# Supplementary material for: Ru-nanoparticles supported on zeolite-Y for ortho-benzylation of phenols and activation of H2O2 for selective synthesis of BINOLs
Source: Royal Society of Chemistry journal article supplement (doi:10.1039/d4cy00429a), 2024-01-01
Supplement: d4cy00429a1.pdf [file d4cy00429a1.pdf]

## Supporting Information

### Ru-nanos at zeolite-Y for *ortho*-benzylation of phenols and activation of H<sub>2</sub>O<sub>2</sub> for selective synthesis of BINOLs

Subir Biswas,<sup>a</sup> Dipankar Barman,<sup>b</sup> Priyanka Dutta,<sup>a</sup> Nand K. Gour,<sup>a</sup> Seonghwan Lee,<sup>c</sup> Donguk Kim,<sup>c</sup> Young-Bin Park,<sup>c</sup> Tonmoy J. Bora,<sup>a</sup> Arpita Devi,<sup>a</sup> Salma A. Khanam,<sup>a</sup> Lakshi Saikia,<sup>d</sup> Galla V. Karunakar,<sup>e</sup> Magdi E. A. Zaki,<sup>f</sup> Kusum K. Bania<sup>\*a</sup>

<sup>a</sup>Department of Chemical Sciences, Tezpur University, Assam 784028, India.

<sup>b</sup>Department of Chemistry, Indian Institute of Technology Guwahati, Assam 781039, India.

<sup>c</sup>Department of Mechanical Engineering, Ulsan National Institute of Science and Technology, UNST-gil 50, Ulsu-gun, Ulsan 44919, Republic of Korea.

<sup>d</sup>Materials Science and Technology Division (MSTD), CSIR-North East Institute of Science and Technology, Jorhat, Assam 785006, India.

<sup>e</sup>Division of Crop Protection Chemicals and Center for NMR and Structural Chemistry, Indian Institute of Chemical Technology, Uppal Road, Tarnaka, Hyderabad, Telangana 500007, India.

<sup>f</sup>Department of Chemistry, Imam Mohammad Ibn Saud Islamic University (IMSIU), Riyadh 11623, Saudi Arabia

Corresponding Authors \*E-mail: kusum@tezu.ernet.in

ORCID: 0000-0001-6535-3913

| Table of Contents |                                                                                                                                                                                                                  |         |
|-------------------|------------------------------------------------------------------------------------------------------------------------------------------------------------------------------------------------------------------|---------|
| SL. No            | Title                                                                                                                                                                                                            | Page No |
| 1                 | Reagents, Chemicals and Solvents                                                                                                                                                                                 | S3      |
| 2                 | Physical Measurements                                                                                                                                                                                            | S3-S5   |
| 3                 | General procedure for synthesis of gram scale substrate study for benzylation of phenol with aromatic alcohol (Scheme S1)                                                                                        | S6      |
| 4                 | <b>Table S1.</b> ICP-OES (EDX-elemental analysis) data for the synthesized materials. The values are given in weight%. The values in the parenthesis are from EDX elemental analysis.                            | S7      |
| 5                 | <b>Table S2.</b> Detected amount of Ru-content in Ru-NaY-1 materials at different concentration of RuCl <sub>3</sub> .xH <sub>2</sub> O (0.001M, 0.005M, 0.01M, 0.02M and 0.05M) from ICP-OES analysis (in wt%). | S7      |
| 6                 | <b>Table S3.</b> Crystallographic data and refinement parameters for the compound <b>5e</b>                                                                                                                      | S8-S9   |
| 7                 | <b>Table S4.</b> Comparison study for (a) for benzylation of phenol with PBA and (b) oxidative C-C coupling of 2-naphthol using H <sub>2</sub> O <sub>2</sub> with previous reports.                             | S10     |
| 8                 | <b>Fig. S1</b> NH <sub>3</sub> -Temperature Programmed Desorption (NH <sub>3</sub> -TPD) plots of (a) neat zeolite-NaY, (b) Ru-NaY-1, (c) Ru-NaY-2 and (d) Ru-NaY-3.                                             | S11     |
| 9                 | <b>Fig. S2</b> HADDF-STEM image and EDX mapping and elemental analysis of Ru-NaY-2                                                                                                                               | S12     |

## Supporting Information

|    |                                                                                                                                                                                                                                                                                                              |         |
|----|--------------------------------------------------------------------------------------------------------------------------------------------------------------------------------------------------------------------------------------------------------------------------------------------------------------|---------|
| 10 | <b>Fig. S3</b> HADDF-STEM image and EDX mapping and elemental analysis of Ru-NaY-3                                                                                                                                                                                                                           | S13     |
| 11 | XPS Analysis<br><b>Fig. S4</b> XP spectrum of Al 2p, Si 2p and O 1s Ru-NaY-1, Ru-NaY-2 and Ru-NaY-3 catalyst                                                                                                                                                                                                 | S14     |
| 12 | <b>Fig. S5</b> XPS Survey scan of Ru-NaY-1, Ru-NaY-2 and Ru-NaY-3 materials                                                                                                                                                                                                                                  | S15     |
| 13 | <b>Fig. S6</b> (a-d) EDX spectra of Ru-NaY-1 catalyst prepared with different of Ru(III)Cl <sub>3</sub> 0.001M, 0.005M, 0.02M and 0.05 M respectively, (e-f) particular region chosen for EDX analysis for respective catalysts.                                                                             | S16     |
| 14 | <b>Fig. S7</b> Graphical representation of optimized wt % Ru content in Ru-NaY-1 catalyst for optimum catalytic activity. % conversions obtained from GC analysis. % yields calculated after separating through column chromatography.                                                                       | S17     |
| 15 | <b>Fig. S8</b> UV-visible spectra of the (a) phenol and (b) BA                                                                                                                                                                                                                                               | S18     |
| 16 | <b>Fig. S9</b> Optimized structures for the benzylation of phenol with benzyl alcohol                                                                                                                                                                                                                        | S19     |
| 17 | <b>Fig. S10</b> Graphical representation of optimized wt % Ru content in Ru-NaY-1 catalyst for optimum catalytic activity. % conversions obtained from GC analysis. % yields calculated after separating through column chromatography.                                                                      | S20     |
| 18 | <b>Fig. S11</b> <sup>1</sup> H and <sup>13</sup> C NMR spectra for reaction solvent recorded after separating the catalyst (Ru-NaY-1) from solvent (toluene).                                                                                                                                                | S21     |
| 19 | <b>Fig. S12</b> X-ray crystallography                                                                                                                                                                                                                                                                        | S22     |
| 20 | <b>Fig. S13</b> Raman study                                                                                                                                                                                                                                                                                  | S23     |
| 21 | <b>Fig. S14</b> Mass spectra                                                                                                                                                                                                                                                                                 | S24     |
| 22 | Recyclability Test<br><b>Fig. S15</b> Graphical representation of each consecutive run (catalytic cycle 1-6) showing % yield of 3a using Ru-NaY-1 catalyst.<br><b>Fig. S16</b> (a) TEM images of reused catalyst after 6 <sup>th</sup> cycle; (b) AFM images of reused catalyst after 6 <sup>th</sup> cycle. | S25-S26 |
| 23 | Characterization of the compound                                                                                                                                                                                                                                                                             |         |
|    | Spectral data of synthesized compounds ( <b>3a-3o</b> )                                                                                                                                                                                                                                                      | S26-S32 |
|    | Characterization data for oxidative coupling reaction ( <b>5a-5h</b> )                                                                                                                                                                                                                                       | S32-S35 |
|    | NMR Spectra of all synthesized products, <b>Compound 3a-3o</b>                                                                                                                                                                                                                                               | S36-S50 |
|    | NMR Spectra of the products, <b>Compound 5a-5h</b>                                                                                                                                                                                                                                                           | S51-S58 |
|    | FT-IR Spectra of all synthesized compounds( <b>3a-3o</b> ) and ( <b>5a-5h</b> )                                                                                                                                                                                                                              | S59-S63 |
| 24 | Cartesian Coordinates of all the optimized geometries at B3LYP/6-311+G(d,p)/SDD level of theory                                                                                                                                                                                                              | S64-S74 |
| 25 | References                                                                                                                                                                                                                                                                                                   | S-75    |

## Supporting Information

### Reagents, Chemicals and Solvents

Catalyst support (like- zeolites, alumina, silica) used here to prepare the materials were obtained from Sigma-Aldrich. Various salts (e.g. ruthenium chloride,  $\text{RuCl}_3 \cdot x\text{H}_2\text{O}$  anhydrous basis) were purchased from Sigma-Aldrich. Stated all the organic reactions were performed in various oven or flame-dried glassware with magnetic stirring bar using optimized reaction conditions under nitrogen or argon atmosphere. The organic substrates used here i.e. phenol derivatives, naphthols derivatives and various aromatic alcohols were procured from Sigma-Aldrich, ThermoFisher Scientific (Alfa Aesar). Various organic solvents and reagents were used here dried and HPLC grade procured from E-Merck and stored over molecular sieves (whether applicable) under dry atmosphere. Dried and clean measuring apparatus, needle and syringes were used whenever required to transfer solvents and reagents.

### Physical Measurements

After synthesizing the materials and overnight vacuum dried the physical measurements were done by several analytical approaches. The powder X-ray diffraction (PXRD) of all materials were performed in a Philips PANalytical Empyrean instrument, enabling low-angle measurement from  $0-70^\circ$  with a minimum step size ( $2\theta$ ) of 0.0001, and BRUKER AXS, GERMANY and Rigaku Corporation, Japan, Model: D8 FOCUS and MINIFIEX instrument in the  $2\theta$  value range of  $5-80^\circ$ . Determination of crystal structure powder samples were carried out by XRD COMMANDER 2, DIFFAC.EVA and Rigaku software. The Fourier transform infrared (FTIR) analyses of solid sample and liquid sample were investigated through PerkinElmer Spectrum Version 10.4.3 instrument. The  $\text{NH}_3$ -Temperature-programmed desorption ( $\text{NH}_3$ -TPD) and  $\text{H}_2$ -Temperature-programmed reduction ( $\text{H}_2$ -TPR) analysis was executed in ChemBET Pulsar TPR/TPD (automated chemisorption analyzer) from Quantachrome Instruments. The  $\text{NH}_3$ -TPD study was performed by taking 0.050 g of the synthesized materials placed in a U-shaped quartz tube, heated with the  $80-800^\circ\text{C}$  with rate of  $10^\circ\text{C}/\text{min}$ . The SU8200 Cold FE-SEM (Hitachi High-Technologies) instrument was used for record Field emission scanning electron microscopy (FESEM) of the synthesized materials with acceleration voltage:  $0.1 \sim 30\text{kV}$  ( $0.01\text{kV}/\text{step}$ ), resolution:  $0.8\text{nm}/15\text{kV}$ ,  $1.1\text{nm}/1\text{kV}$ , magnification: LM  $20 \sim 2,000\text{X}$ , HM  $100 \sim 800,000\text{X}$  and electrical image shift:  $\pm 12\mu\text{m}$  ( $\text{WD}=8\text{mm}$ ). The transmission electron microscopy (TEM), STEM imaging (HAADF), energy dispersive X-ray (EDX) were recorded on a model: JEM-2100F, JEOL, instrument with Lattice resolution: 0.102, with a 200 kV accelerating voltage and having HAADF-STEM resolution: 0.096 nm. The HR-TEM (TEM, STEM-HAADF, EDX) of the samples (*viz* Ru-NaY-1, Ru-NaY-2 and Ru-NaY-3) were carried out taking  $0.1 \text{ mg}/1000 \mu\text{L}$  (samples/ethanol solution) in a bath sonication for 45. Then samples/ethanol solution was taken in TEM grid, Lacey carbon film 300 mesh, Nickel and evaporated at  $40^\circ\text{C}$  for 30 min. After that the imaging technique was done taking various image resolution. The EDX analysis of optimal Ru-content in different concentration of  $\text{RuCl}_3 \cdot x\text{H}_2\text{O}$  (0.001M, 0.005, 0.02M and 0.05M) in Ru-NaY-1 material was done in Material Science and Technology Division (CSIR-North East Institute of Science & Technology, Jorhat, India) using Oxford XMax 20 detector. Shimadzu, UV-2550 spectrophotometer was used for UV-Visible

## Supporting Information

study of reactions. Inductively Coupled Plasma Optical Emission Spectrophotometer (ICP-OES) analysis was performed in PERKIN ELMER, USA, Model: AVIO 220 MAX. Syngistic software was used. Bruker Multi-mode V (Model) instrument with Contact, Tapping, and ScanAsyst imaging modes were used for Atomic force microscopy (AFM) analysis of the materials. The instrument having resolution of  $< 5$  nm and measuring up to  $120 \mu\text{m} \times 120 \mu\text{m}$  areas with vertical range of nearly  $5 \mu\text{m}$ , maximum sample size:  $1 \text{ cm} \times 1 \text{ cm}$ . The AFM analyses of samples were prepared by sonication followed by drop casting method. For sample preparation  $0.1 \text{ g}$  of sample or zeolite-Y was mixed with  $1 \text{ mL}$  of ethanol solution, and then the mixture was sonicated for  $100 \text{ min}$ . After forming fine slurry, the suspension was drop casted on mica disc ( $12 \text{ nm}$ ) and then evaporated at  $60 \text{ }^\circ\text{C}$  for  $30 \text{ min}$ . After that the dried samples were ready for AFM analysis. The synthesized and oven-dried samples (finely ground) were dusted on a graphite sheet (double side stick) and mounted over the sample holder, before being transferred to an analysis chamber. The sample was degassed overnight in a vacuum oven before recording the X-ray photoelectron spectroscopy (XPS) The XPS analysis was performed with KRATOS (ESCA AXIS 165) spectrometer using  $\text{Mg K}\alpha$  ( $1253.6 \text{ eV}$ ) radiation as a source. The binding energy values were corrected with reference to  $\text{C } 1\text{s}$  peak at  $284.8 \text{ eV}$ . The electrochemical measurements of all the materials were executed in CH Instruments, model: CHI-600E potentiostat meter. Glassy Carbon Electrode (GCE) and also platinum (Pt) electrode were used as working electrode in electrochemical cell for cyclic voltammetry analysis. The  $\text{Ag}/\text{AgCl}$  and Pt wire were used as reference electrode and as a counter electrode respectively. Thermo Gravimetric Analysis (TGA) of all the materials were carried out on Mettler Toledo simultaneous TG thermo analyzer. The analyzer was equipped with a platinum (Pt) crucible, 13% thermocouples of Pt/Pt-Rh with flow rate of  $20 \text{ mL}/\text{min}$  of controlling gas (air). Thin-layer chromatography (TLC) technique was executed to monitor the progress of the reaction by taking TLC Silica gel 60 F<sub>254</sub> aluminum pre-coated plates (layer thickness  $\sim 0.25 \text{ mm}$ ) from Merck. The TLC plates (chromatograms) were visualized under UV light at  $254 \text{ nm}$  (short range) using Relitech UV chamber with using suitable TLC stains (e.g. iodine chamber). GC analysis was performed for the calculation of % conversion of phenol and 2-naphthol for benzylation and oxidative coupling reaction respectively. GC-MS Aglient 7980 series with HP-5 column and flame ionization detector was used for the analysis. The results are predicted in mol % using the following formula: % conversion reactant =  $[\text{moles of reactant} \times 100/\text{Initial moles of reactant}]$ . After successful separation of the product the following equation is used for calculation of the % isolated product yield as: % yield =  $[\text{mole of isolated product}/\text{mole of limiting reactant}] \times 100$ . After purification of the product, NMR spectra were recorded on 400, 500 and 600 MHz spectrometers (for  $^1\text{H}$  NMR spectra) and 101, 126 and 151 MHz (for  $^{13}\text{C}$  NMR spectra). The  $^1\text{H}$  and  $^{13}\text{C}$  NMR analyses were done by DRX-400 Varian, Bruker AVANCE III HD 600 MHz, 500 MHz and 400 MHz spectrometers. In NMR analysis, various chemical shifts ( $\delta$ -value) are described in unit of ppm from tetramethylsilane (TMS) as the internal standard (for  $\text{CDCl}_3$  solvent:  $\delta 7.26$  for  $^1\text{H}$  NMR and  $\text{CDCl}_3$ :  $\delta 77.16$  for  $^{13}\text{C}$  NMR analysis). The spin-spin coupling constants (J) were in hertz (Hz) unit, and other data were represented as follows: s (singlet), d

## Supporting Information

(doublet), dd (doublet of doublet), ddd (doublet of doublet of doublet) t (triplet), m (multiplet) q (quartet). The  $^1\text{H}$  NMR data were reported as follow: chemical shift ( $\delta$ ) (multiplicity, coupling constant, integration i.e., number of protons). The mass of the organic molecules was determined by Low-resolution mass spectra (LRMS) for all the compounds. Mass spectra (MS) of the samples were recorded in Thermo Scientific Q-Exactive, Accela 1250 pump. Perkin Elmer 2400 (series II) CHN analyzer was used for elemental analysis (wt% C, H) in the synthesized compounds (taking acetanilide as internal organic analytical standard: C= 71.09%, H= 6.7%1, N=10.36%, PerkinElmer). LRMS were recorded on an Agilent InfinityLab LC/MSD 6125SQ LCMS system using 1260 Quat Pump. Bruker SMART Apex II CCD diffractometer using Mo  $\text{K}\alpha$  ( $\lambda = 0.71073 \text{ \AA}$ ) radiation was used for X-ray diffraction study and data collection.<sup>1</sup> Bruker SMART software was used to collect the X-ray diffraction data of all crystals and also utilized for indexing and determination of the unit cell parameters of the crystals. SHELXTL software was used for solving the cell structures by direct method after refined by full-matrix least squares against F2 of all results. All H-atoms in isotropic approximation, against F2 of all reflections along with all other the non-H-atoms were refined by full-matrix least squares in anisotropic.

## Supporting Information

### General procedure for synthesis of gram scale substrate study for benzylation of phenol with aromatic alcohol

In scale-up reaction of phenol and BA, in a 50 mL RB with phenol, 1a (7 mmol, 0.66g, 1 equiv.) and benzyl alcohol 2a (10.5 mmol, 1.13g, 1.5 equiv.) with ~ 200 mg Ru-NaY-1 in 7 mL of DCE were refluxed at 100 °C for 6 h. After completion, the *ortho*-substituted product 3a was obtained as the major product (~76 %) while the *para*-substituted adduct, 3a' was detected as trace amount and was not isolated (Scheme S1, experiment: a). Another gram-scale study was performed by taking 1a (7 mmol, 0.66g, 1 equiv.) and 4-methoxy benzyl alcohol, 2d (10.5 mmol, 1.4g, 1.5 equiv.) under same condition. The products 3d (5.65 mmol, 1.21 g, isolated yield: 81%) along with *para*-substituted product was also obtained as 3d', white solid, yield ~ 9% (0.6 mmol) (Scheme S1, experiment: b).

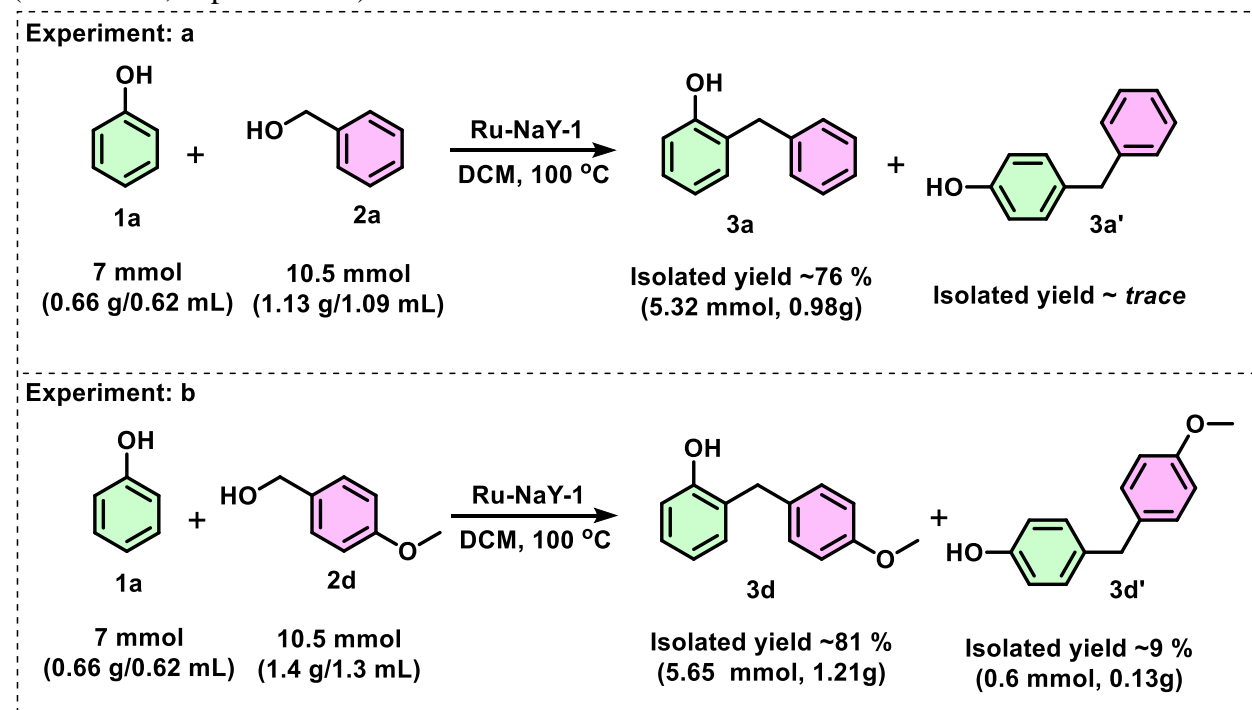

**Scheme S1.** Gram-scale reaction of (a) phenol and benzyl alcohol, (b) phenol and 4-methoxybenzyl alcohol.

## Supporting Information

**Table S1.** ICP-OES (EDX-elemental analysis) data for the synthesized materials. The values are given in weight%. The values in the parenthesis are from EDX elemental analysis.

| Materials | Elements (wt%) |              |              |                 | Metal loading <sup>a</sup><br>(mmol g <sup>-1</sup> of support) |
|-----------|----------------|--------------|--------------|-----------------|-----------------------------------------------------------------|
|           | Si             | Al           | O            | Ru              |                                                                 |
| Ru-NaY-1  | -<br>(29.61)   | -<br>(5.40)  | -<br>(41.56) | 3.60<br>(23.53) | 0.35<br>-                                                       |
| Ru-NaY-2  | -<br>(30.71)   | -<br>(3.28)  | -<br>(43.56) | 3.45<br>(22.45) | 0.34<br>-                                                       |
| Ru-NaY-3  | -<br>(30.54)   | -<br>(11.28) | -<br>(37.41) | 3.41<br>(20.76) | 0.33<br>-                                                       |

$${}^a \text{Metal loading} = \frac{\text{Observed metal \%} \times 10}{\text{Atomic weight of metal}} \text{ (in mmol g}^{-1}\text{)}^2$$

**Table S2.** Detected amount of Ru-content in Ru-NaY-1 materials at different concentration of RuCl<sub>3</sub>.xH<sub>2</sub>O (0.001M, 0.005M, 0.01M, 0.02M and 0.05M) from ICP-OES analysis (in wt%).

| Entry | Conc. of RuCl <sub>3</sub> (in M) | Ru-loading (wt%) |
|-------|-----------------------------------|------------------|
| 1     | 0.001                             | 0.39             |
| 2     | 0.005                             | 1.87             |
| 3     | 0.01                              | 3.60             |
| 4     | 0.02                              | 5.32             |
| 5     | 0.05                              | 7.14             |

## Supporting Information

**X-ray Crystallographic analysis:** All the crystallographic information of crystals is given in the crystallographic table, **Table S3** which contains the crystal parameters and the refinement factor. The structure of **5e** was drawn at MERCURY software.<sup>3</sup> The CIF files of compound **5e** having the whole information of the studied structure was deposited with CCDC, deposition number **2295241** which are easily accessible upon request from the Director, CCDC, 12 Union Road, Cambridge CB21EZ, UK (Fax: +44-1223-336033; email:deposit@ccdc.cam.ac.uk) or from the following website: [www.ccdc.cam.ac.uk/data\\_request/cif](http://www.ccdc.cam.ac.uk/data_request/cif).

**Table S3.** Crystallographic data and refinement parameters for the compound **5e**

|                                            |                                                                                               |
|--------------------------------------------|-----------------------------------------------------------------------------------------------|
| Compound name                              | <b>Compound 5e</b><br><i>(Dimethyl 2,2'-dihydroxy-[1,1'-binaphthalene]-6,6'-dicarboxylate</i> |
| chemical formula                           | C <sub>24</sub> H <sub>18</sub> O <sub>6</sub>                                                |
| CCDC deposition number                     | 2295241                                                                                       |
| formula mass                               | 402.38                                                                                        |
| crystal system                             | monoclinic                                                                                    |
| space group                                | I2/c                                                                                          |
| a/Å, b/Å, c/Å                              | 13.71(3), 8.846(19), 16.24(3)                                                                 |
| α/°, β/°, γ/°                              | 90.00, 93.51(18), 90.00                                                                       |
| V/Å <sup>3</sup>                           | 1966(7)                                                                                       |
| Density (g cm <sup>-3</sup> )              | 1.360                                                                                         |
| T/K                                        | 296(2)                                                                                        |
| Z                                          | 4                                                                                             |
| radiation type                             | Mo Kα                                                                                         |
| absorption coefficient, μ/mm <sup>-1</sup> | 0.098                                                                                         |
| Total no. of reflections measured          | 2385                                                                                          |
| Reflections, I > 2σ(I)                     | 612                                                                                           |
| Complete to 2θ (%)                         | 99.1                                                                                          |
| Ranges (h, k, l)                           | -17 ≤ h ≤ 18                                                                                  |



## Supporting Information

|                                |                                              |
|--------------------------------|----------------------------------------------|
|                                | $-11 \leq k \leq 11$<br>$-21 \leq l \leq 21$ |
| Data/ Restraints/Parameters    | 2385/0/137                                   |
| R indices [ $I > 2\sigma(I)$ ] | 0.0953                                       |
| R indices (all data)           | 0.3392                                       |
| wR2 (all data)                 | 0.1902                                       |
| Goodness of fit                | 1.063                                        |

## Supporting Information

**Table S4.** Comparison study for (a) for benzylation of phenol with PBA and (b) oxidative C-C coupling of 2-naphthol using H<sub>2</sub>O<sub>2</sub> with previous reports.

| (a) Comparative study for benzylation of phenol with PBA                                           |                                                                                                        |                                                         |                                        |                  |                              |                         |
|----------------------------------------------------------------------------------------------------|--------------------------------------------------------------------------------------------------------|---------------------------------------------------------|----------------------------------------|------------------|------------------------------|-------------------------|
|                                                                                                    |                                                                                                        |                                                         |                                        |                  |                              |                         |
| Entry                                                                                              | Catalyst                                                                                               | Conditions                                              | Product (specific to this scheme)      | Yield of 3a (%)  | Selectivity                  | Ref.                    |
| 1                                                                                                  | [(C <sub>6</sub> H <sub>6</sub> )(PCy <sub>3</sub> )(CO)RuH] <sup>+</sup> BF <sub>4</sub> <sup>-</sup> | 100 °C, Toluene, C <sub>5</sub> H <sub>8</sub> , 6-12 h | 1 (22 overall, both 1° and 2° alcohol) | 92               | 3a                           | 4                       |
| 2                                                                                                  | Zr-Modified Superacid:U DCaT-5                                                                         | 140 °C, 1 h                                             | 15 (both 1° and 2° alcohol)            | 65               | 3a + 3a'                     | 5                       |
| 3                                                                                                  | HCl                                                                                                    | 180 °C, 0.05 M HCl, 16 h                                | 11 (both 1° and 2° alcohols)           | 78               | 3a + 3a'                     | 6                       |
| 4                                                                                                  | Bi(OTf) <sub>3</sub>                                                                                   | -, MeNO <sub>2</sub> , 2 h                              | 2 (22 overall, both 1° and 2°)         | 66               | 3a + 3a' + 3a''              | 7                       |
| 5                                                                                                  | ZrO <sub>2</sub> /SBA-15                                                                               | 90 °C, 12-Tungstophosphoric acid, Silica; 3 h           | 1                                      | 77               | 3a + 3a'+ ethers             | 8                       |
| <b>6</b>                                                                                           | <b><i>Ru-NaY-1</i></b>                                                                                 | <b><i>100 °C, DCE, 6 h</i></b>                          | <b><i>15</i></b>                       | <b><i>82</i></b> | <b><i>3a + trace 3a'</i></b> | <b><i>This work</i></b> |
| (b) Comparative study for oxidative C-C coupling of 2-naphthol using H <sub>2</sub> O <sub>2</sub> |                                                                                                        |                                                         |                                        |                  |                              |                         |
|                                                                                                    |                                                                                                        |                                                         |                                        |                  |                              |                         |
| Entry                                                                                              | Catalyst                                                                                               | Conditions                                              | No. Product                            | Yield of 5a (%)  | Ref.                         |                         |
| 1                                                                                                  | Au/SrTiO <sub>3</sub>                                                                                  | rt, dark                                                | 1                                      | -                | 9                            |                         |
| 2                                                                                                  | Benzothioephene S-oxide                                                                                | DCM/TFA, TFAA, ligand 0°C to rt, >2 h                   | 27                                     | 84               | 10                           |                         |
| 3                                                                                                  | Pd-Au-Y                                                                                                | Toluene, 60 °C, 4h                                      | 1                                      | 58               | 11                           |                         |
| 4                                                                                                  | AuVOx-MWCNT                                                                                            | Toluene, 60 min, MW-450                                 | 1                                      | 78               | 12                           |                         |
| <b>5</b>                                                                                           | <b><i>Ru-NaY-1</i></b>                                                                                 | <b><i>Toluene, rt, 15 min</i></b>                       | <b><i>8</i></b>                        | <b><i>91</i></b> | <b><i>This study</i></b>     |                         |

*This comparative study is only based on reactions which utilized H<sub>2</sub>O<sub>2</sub> as oxidant.*

NH<sub>3</sub>-Temperature Programmed Desorption (NH<sub>3</sub>-TPD) plots of synthesized materials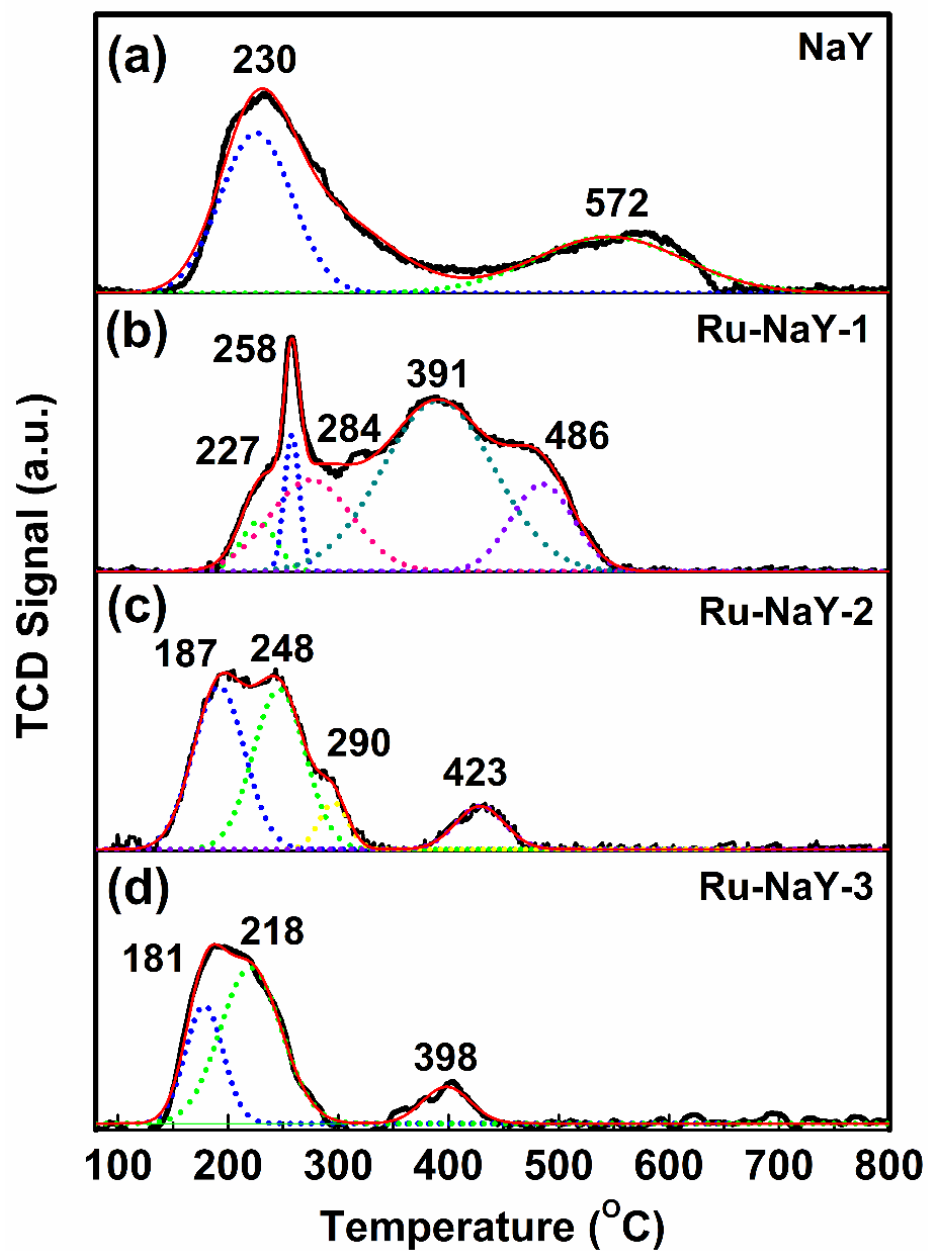

**Fig. S1** NH<sub>3</sub>-Temperature Programmed Desorption (NH<sub>3</sub>-TPD) plots for (a) neat zeolite-NaY, (b) Ru-NaY-1, (c) Ru-NaY-2 and (d) Ru-NaY-3.

## Supporting Information

### Characterization of the synthesized materials HADDF-STEM image and EDX mapping and elemental analysis Ru-NaY-2

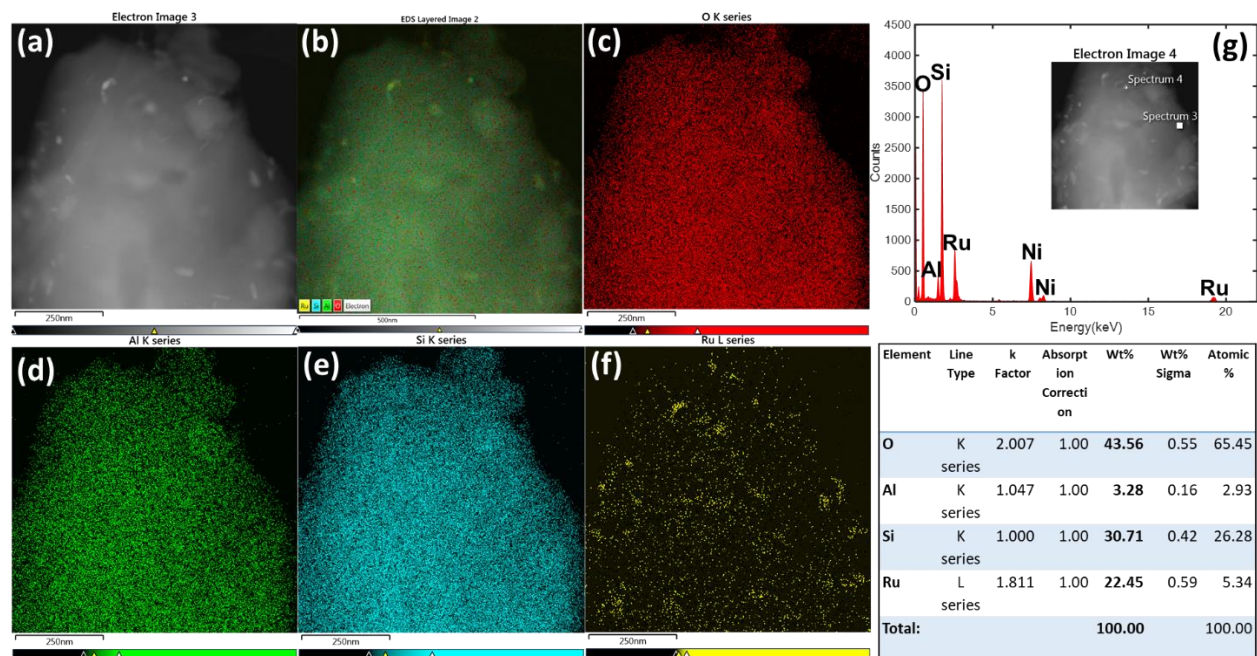

**Fig. S2** (a-b) HADDF-STEM images showing the Ru-NPs located on Ru-NaY-2, (c-f) EDX mapping showing the presence of all the elements in Ru-NaY-2 (g) EDX spectra and details of all elements.

## Supporting Information

### HADDF-STEM image and EDX mapping and elemental analysis of Ru-NaY-3

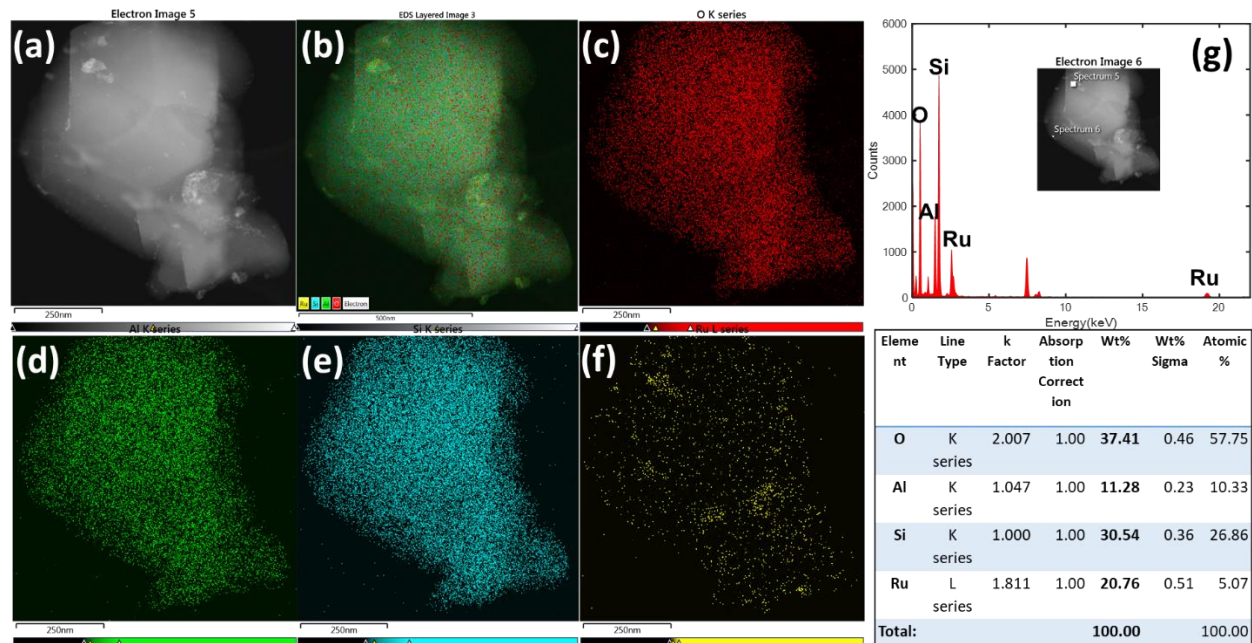

**Fig. S3** (a-b) HADDF-STEM images showing the Ru-NPs located on Ru-NaY-3, (c-f) EDX mapping showing the presence of all the elements in Ru-NaY-3 (g) EDX spectra and details of all elements.

## Supporting Information

### XPS analysis

#### XP spectrum of Al 2p, Si 2p and O 1s of Ru-NaY-1, Ru-NaY-2 and Ru-NaY-3 catalyst

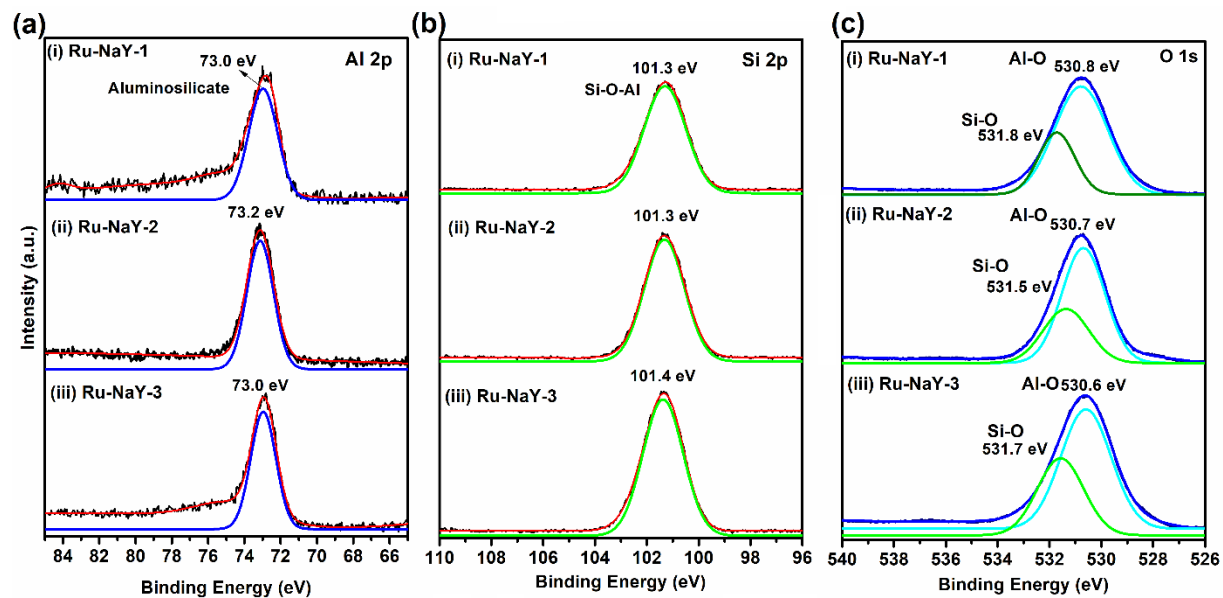

**Fig. S4** The XP spectra of (a) Al 2p, (b) Si 2p and (c) O 1s in of Ru-NaY-1, Ru-NaY-2 and Ru-NaY-3 catalyst.

## XPS Survey scan of Ru-NaY-1, Ru-NaY-2 and Ru-NaY-3 materials

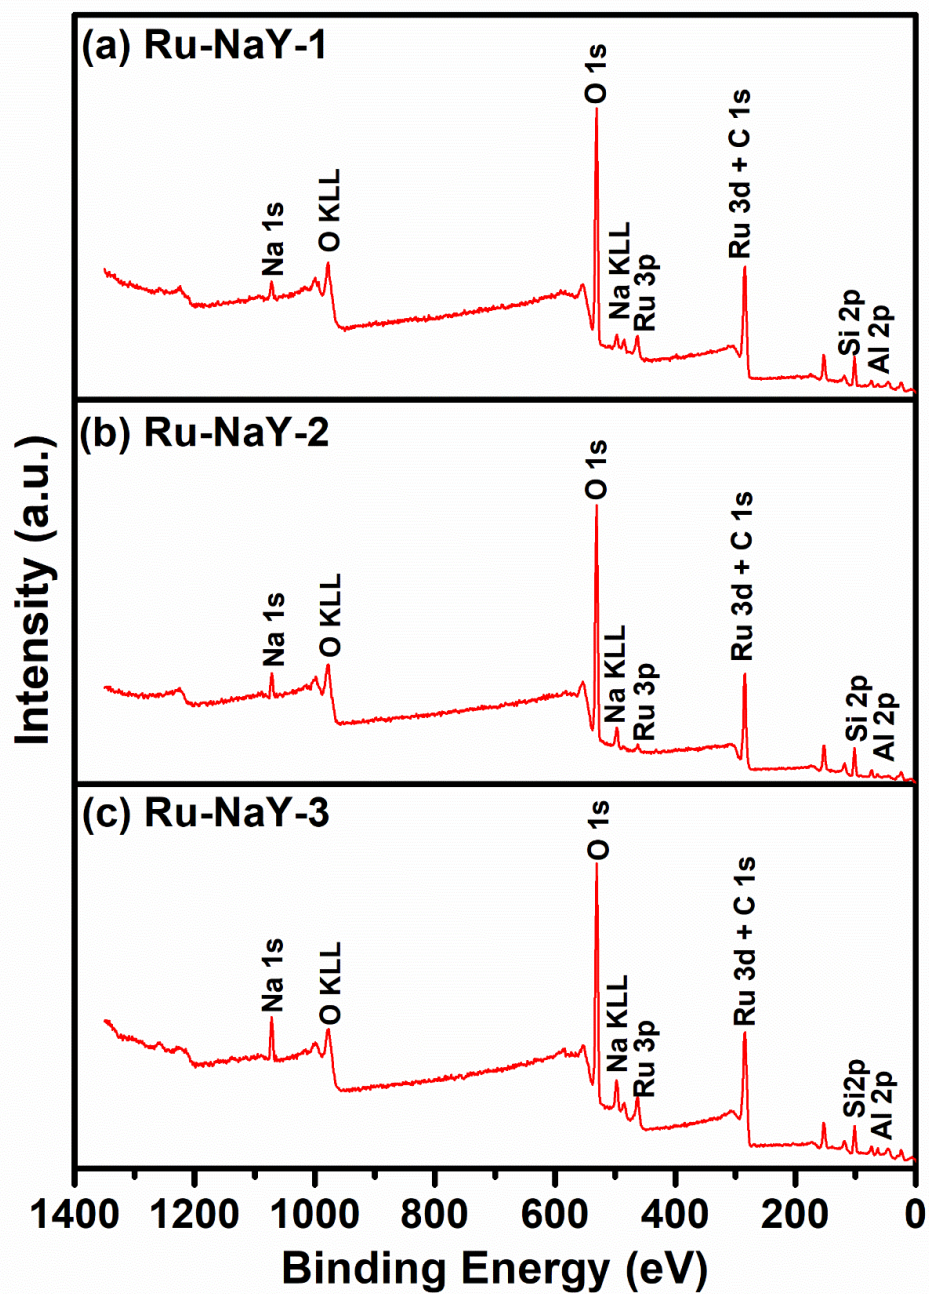

Fig. S5 Full XPS survey scan of (a) Ru-NaY-1, (b) Ru-NaY-2 and (c) Ru-NaY-3 materials.

## Supporting Information

### EDX analysis of synthesized materials

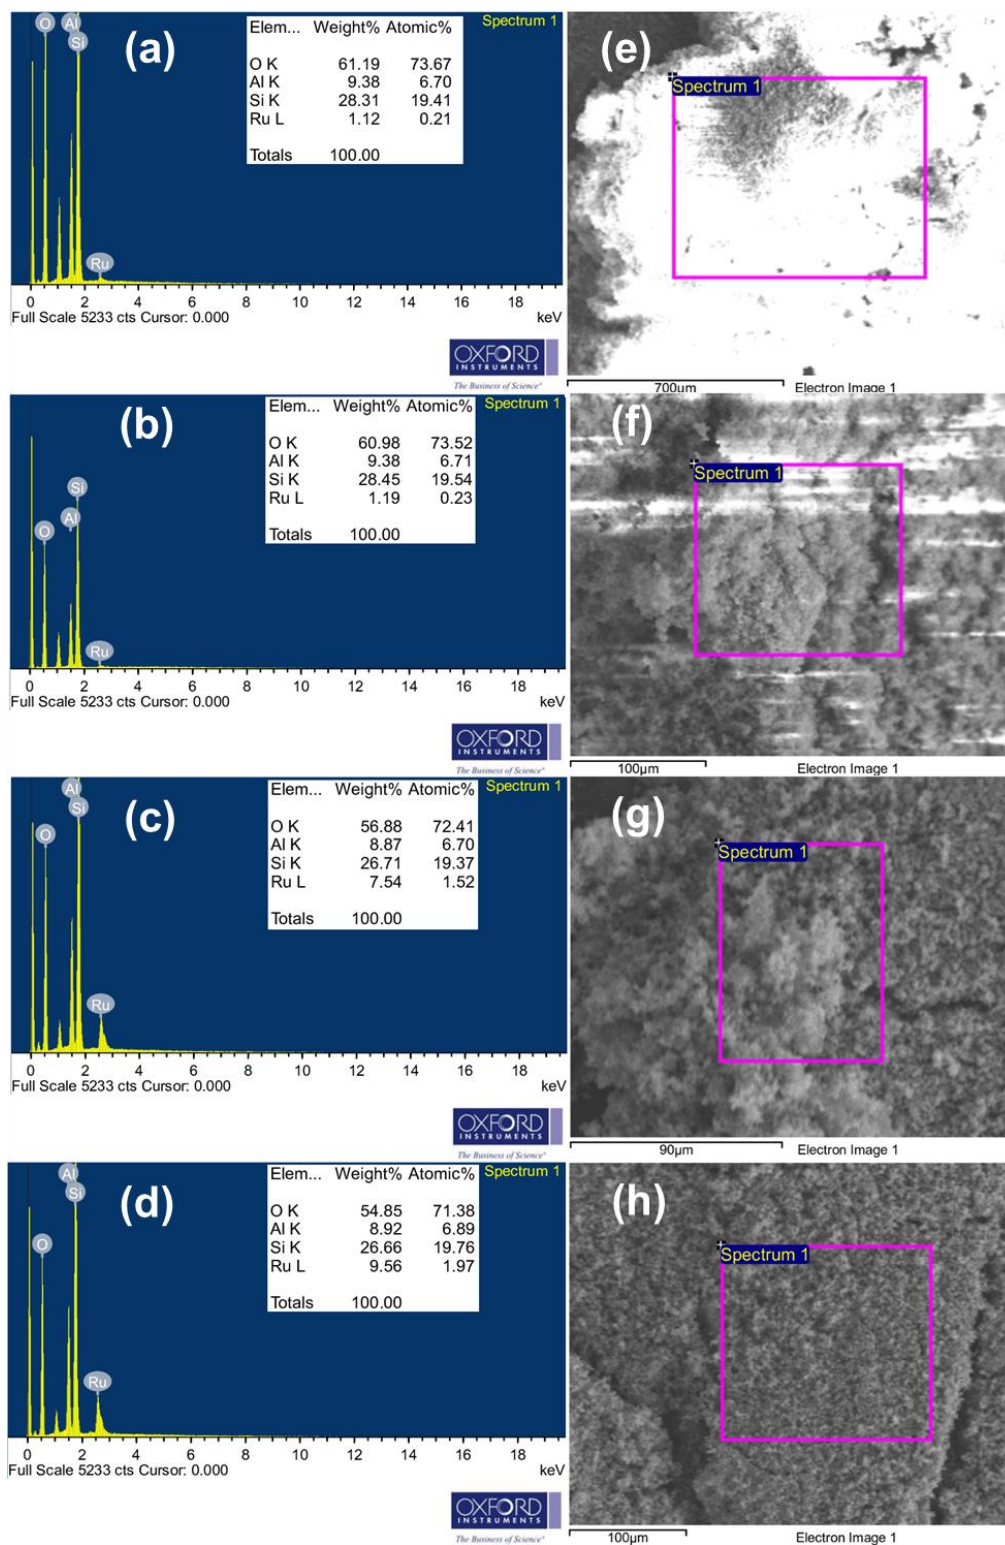

**Fig. S6** (a-d) EDX spectra of Ru-NaY-1 catalyst prepared with different of  $\text{RuCl}_3 \cdot x\text{H}_2\text{O}$  0.001M, 0.005M, 0.02M and 0.05 M, respectively, (e-f) particular region chosen for EDX analysis for respective catalysts.



## Supporting Information

Optimization of Ru content in Ru-NaY-1 catalyst for optimum catalytic performance for benzylation reaction

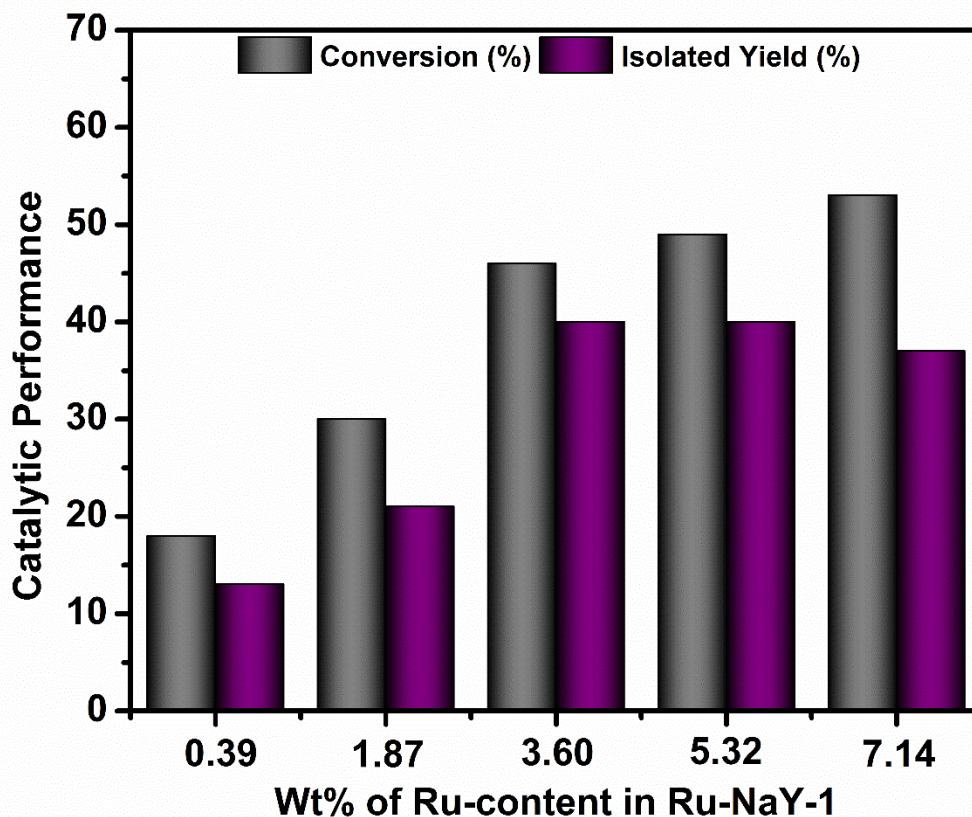

**Fig. S7** Graphical representation of optimized wt % Ru content in Ru-NaY-1 catalyst for optimum catalytic activity. % conversions obtained from GC analysis. % yields calculated after separating through column chromatography.

## Supporting Information

### UV-visible spectra

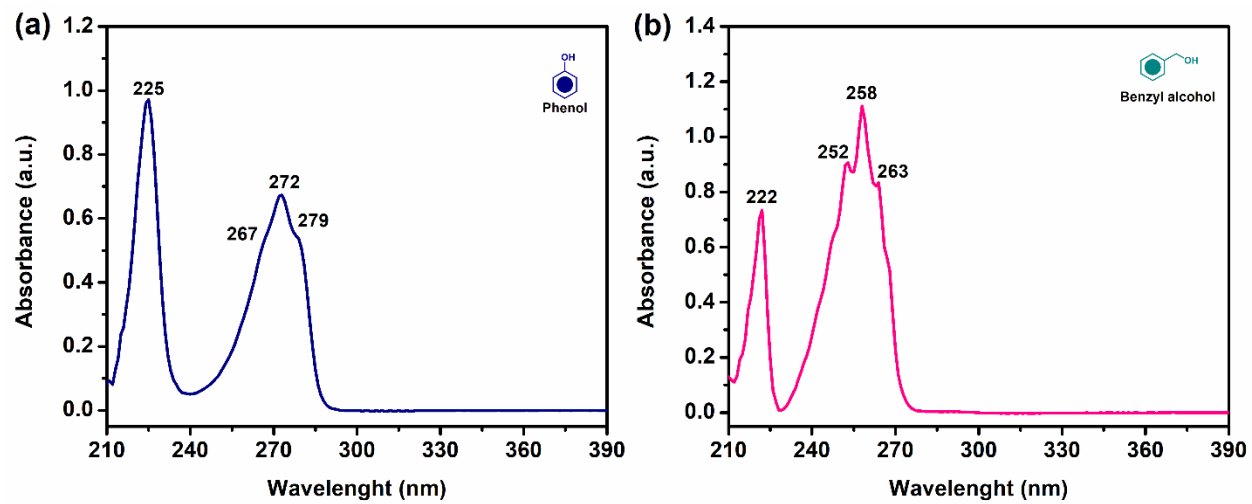

Fig. S8 UV-visible spectra of the (a) phenol and (b) BA

## Supporting Information

### Optimized structures for the benzylation of phenol with benzyl alcohol

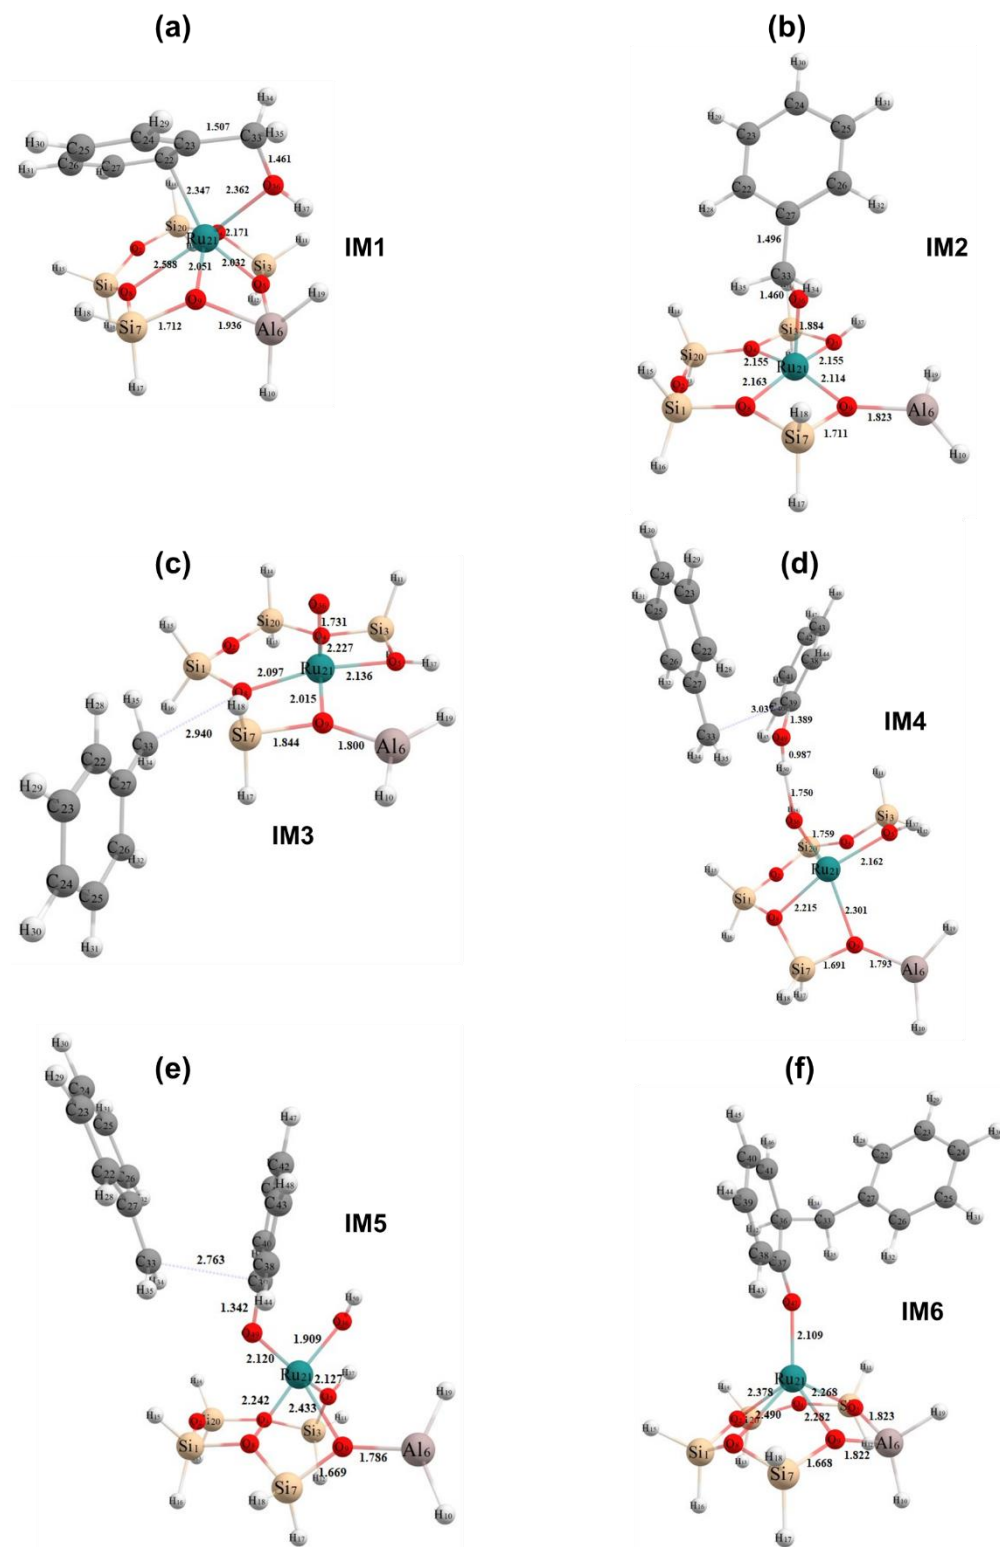

**Fig. S9** Optimized structures for the benzylation of phenol with benzyl alcohol at B3LYP/6-311+G(d,p)/SDD level of theory.

## Supporting Information

Optimization of Ru content in Ru-NaY-1 catalyst for optimum catalytic performance for 2-naphthol oxidation reaction

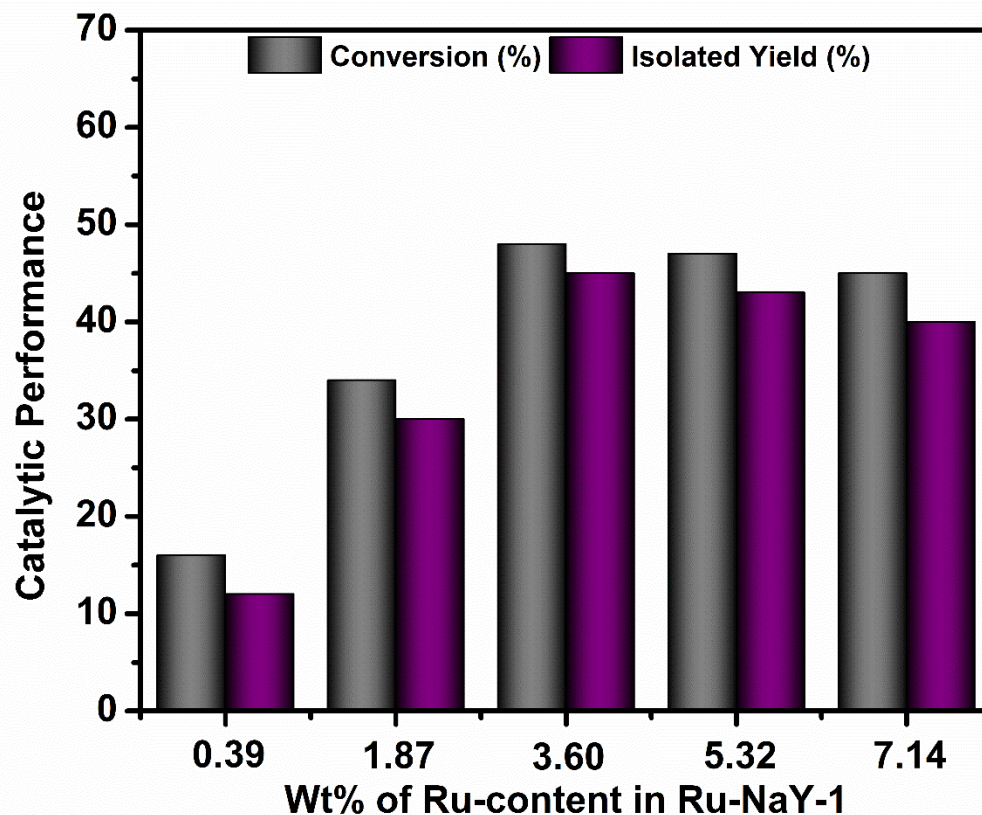

**Fig. S10** Graphical representation of optimized wt % Ru content in Ru-NaY-1 catalyst for optimum catalytic activity. % conversions obtained from GC analysis. % yields calculated after separating through column chromatography.

## Supporting Information

### NMR spectra of solvent after reaction

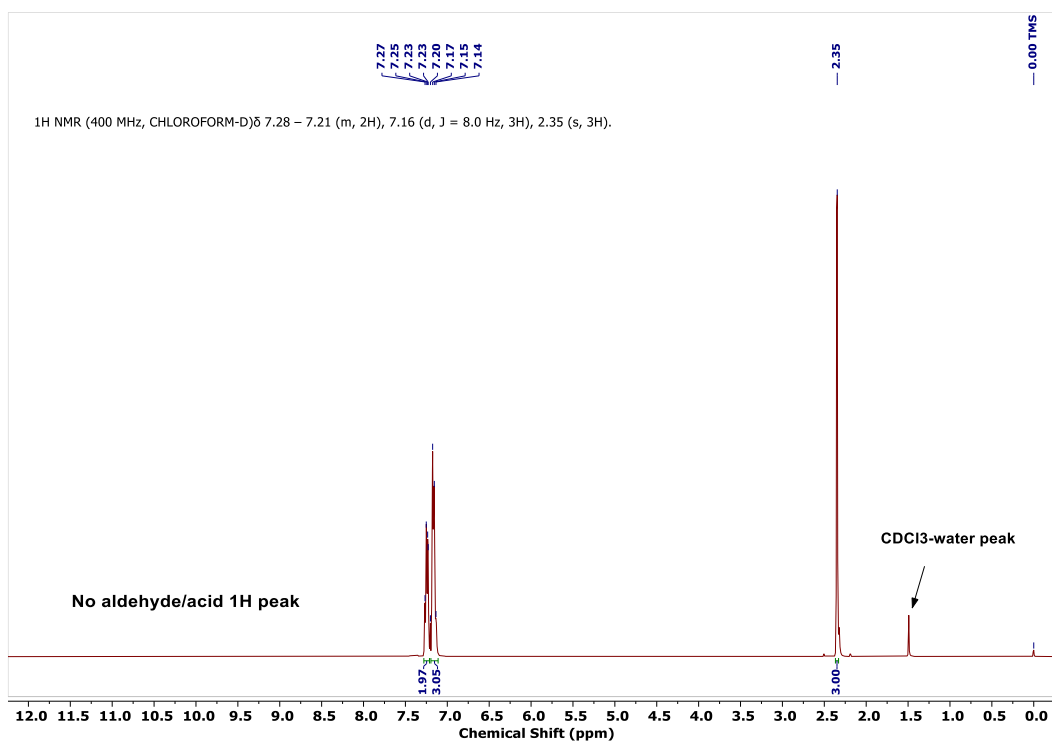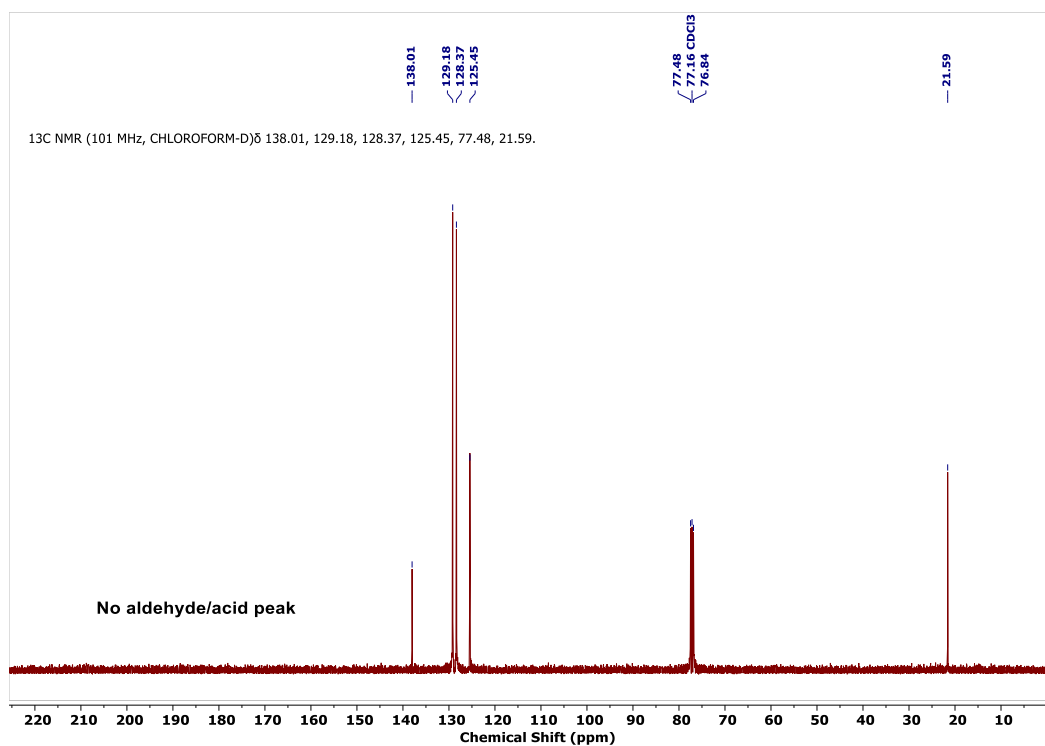

**Fig. S11** <sup>1</sup>H and <sup>13</sup>C NMR spectra for reaction solvent recorded after separating the catalyst (Ru-NaY-1) from solvent (toluene).

## Supporting Information

### X-ray structure of 5e

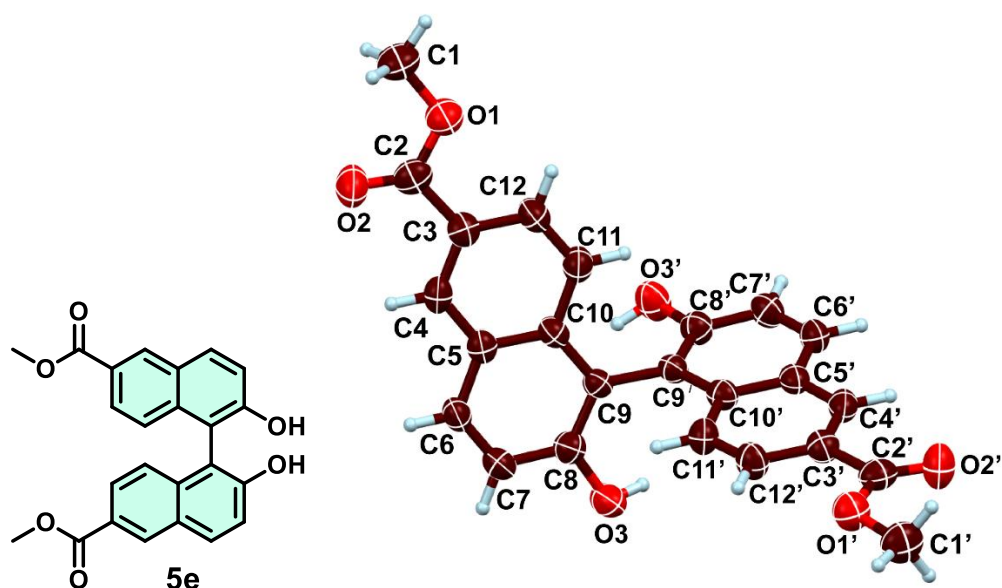

**Fig. S12** ORTEP view (40% thermal ellipsoid probability) of **5e** (CCDC 2295241).

## Supporting Information

### Raman study

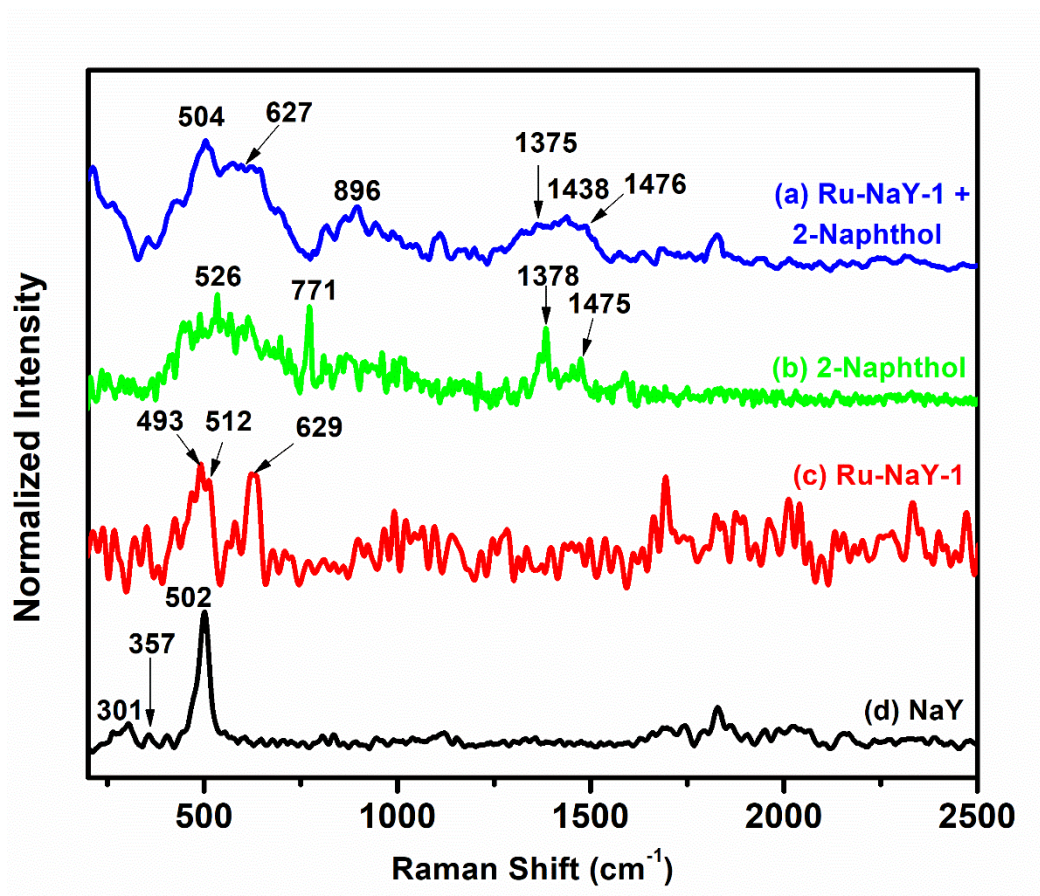

**Fig. S13** Raman spectra of (a) Ru-NaY-1 + 2-naphthol, (b) 2-naphthol, (c) Ru-NaY-1 and (d) neat zeolite-NaY.

# Supporting Information

## Mass spectra of radical trapping experiment

Print of window 80: MS Spectrum

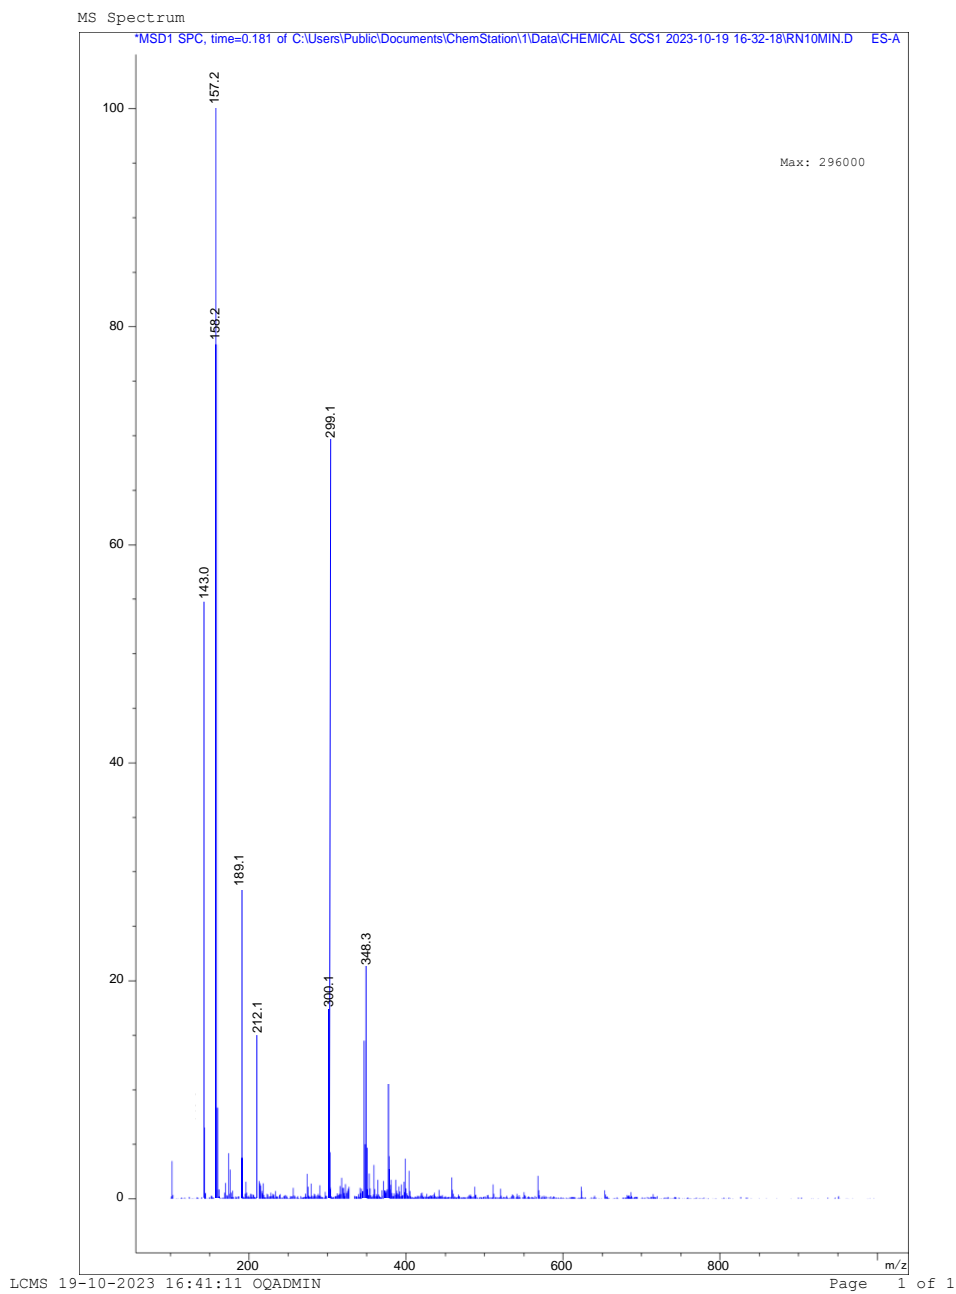

**Fig. S14** LCMS spectra of reaction mixture after 10 min.



## Supporting Information

### Catalytic recyclability study

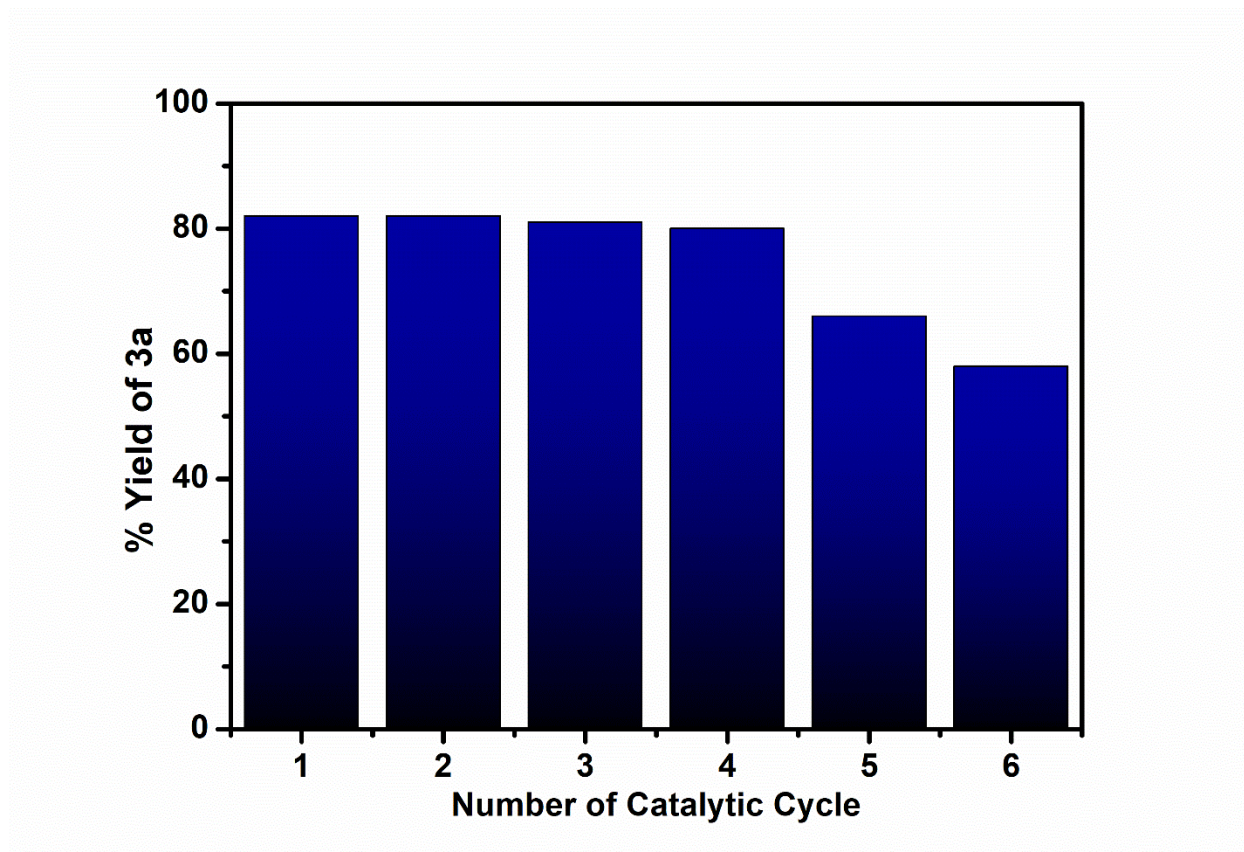

**Fig. S15** Graphical representation of each consecutive run (catalytic cycle 1-6) showing % yield of 3a using Ru-NaY-1 catalyst.

## Supporting Information

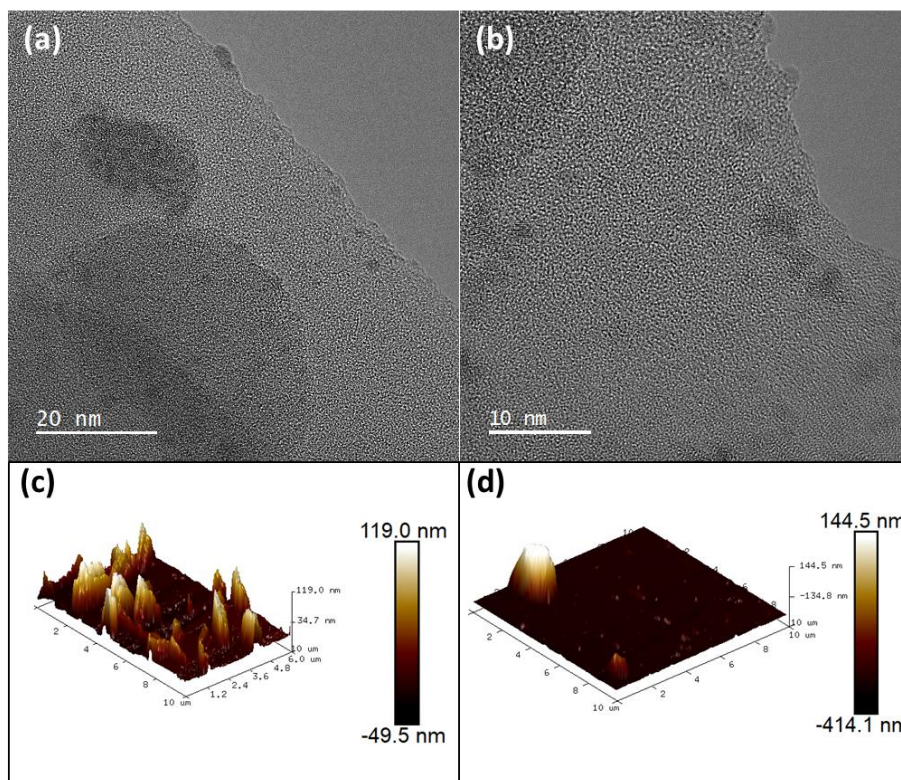

**Fig. S16** (a) TEM images of reused catalyst after 6<sup>th</sup> cycle; (b) AFM images of reused catalyst after 6<sup>th</sup> cycle.

### Characterization of the compound

#### Spectral data of synthesized compounds (3a-3o)

After the monitoring the reaction at optimized conditions the different isolated benzylated products are characterized by <sup>1</sup>H, <sup>13</sup>C NMR, FTIR, mass and elemental analysis.

#### Compound 3a: 2-benzylphenol <sup>4</sup>

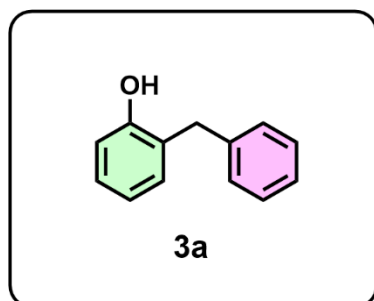

The titled compound (Compound 3a) was synthesized by using GP-A using phenol (1 mmol) and benzyl alcohol (1.5 mmol). After completion, the product was separated and purified by column chromatography on 100-200 mesh silica gel (gradient from 0-5% ethyl acetate/n-hexanes solvent system) to afford 3a as a light brown semi-solid (82% yield). **NMR Analysis:** <sup>1</sup>H NMR (400 MHz, CDCl<sub>3</sub>): δ 8.04 (d, *J* = 8.6 Hz NMR Analysis: <sup>1</sup>H NMR (400 MHz, CDCl<sub>3</sub>): δ 7.32 – 7.26 (m, 2H), 7.24 – 7.18 (m, 3H), 7.13 (dd, *J* = 11.9, 4.4 Hz, 2H), 6.89 (t, *J* = 7.8 Hz, 1H), 6.78 (d, *J* = 7.8 Hz, 1H), 4.64 (s, 1H), 4.00 (s, 2H). <sup>13</sup>C NMR (126 MHz, CDCl<sub>3</sub>): δ 153.8, 140.0, 131.1, 128.8, 128.0, 127.1, 126.5, 121.1, 115.8, 36.5. **FTIR (KBr):** 3293, 3063, 3026, 2920, 2842, 1602, 1589, 1494, 1350, 1273, 1210, 1205, 1088, 850, 766, 698 cm<sup>-1</sup>. **LRMS (ESI):** *m/z* calculated for C<sub>13</sub>H<sub>11</sub>O [M-H]<sup>+</sup>: 183.1, found 183.1 (100%). **Elemental Analysis:** Anal. calcd for C<sub>13</sub>H<sub>12</sub>O: C, 84.75; H, 6.57; found: C, 85.01.58, H, 6.51. The characterization data of synthesized compound are in accordance with the reported one.

## Supporting Information

### Compound 3b: 2-(4-methylbenzyl)phenol <sup>13</sup>

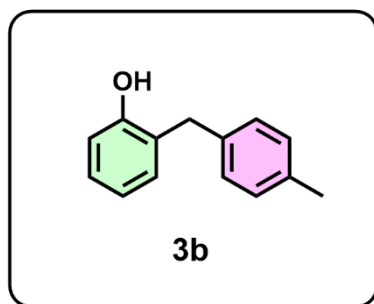

The titled compound (3b) was synthesized by using GP-A using phenol (1.0 mmol) and 4-methylbenzyl alcohol (1.5 mmol). The final crude was purified by column chromatography on 100-200 mesh silica gel (gradient from 0-5% ethyl acetate/n-hexanes solvent system) to afford 3b as a yellow liquid (85% yield). **NMR Analysis:** <sup>1</sup>H NMR (400 MHz, CDCl<sub>3</sub>): δ 7.17 – 7.06 (m, 6H), 6.88 (t, *J* = 7.8 Hz, 1H), 6.78 (d, *J* = 8.1 Hz, 1H), 4.63 (s, 1H), 3.95 (s, 2H), 2.31 (s, 3H). <sup>13</sup>C NMR (126 MHz, CDCl<sub>3</sub>): δ 153.9, 136.7, 136.1, 131.1, 129.5, 128.7, 127.9, 127.3, 121.1, 115.9, 36.2, 21.2. **FTIR (KBr):** 3291, 3044, 3019, 2920, 2857, 1610, 1590, 1513, 1504, 1357, 1232, 1169, 1096, 911, 815, 760, 709 cm<sup>-1</sup>. **LRMS (ESI):** m/z calculated for C<sub>14</sub>H<sub>13</sub>O [M-H]<sup>+</sup>: 197.1, found 197.1 (100%). **Elemental Analysis:** Anal. calcd for C<sub>14</sub>H<sub>14</sub>O: C, 84.81; H, 7.12; found: C, 84.98, H, 7.36. The reported data of synthesized compound are in accordance with the literature one.

### Compound 3c: 2-(4-isopropylbenzyl)phenol <sup>14</sup>

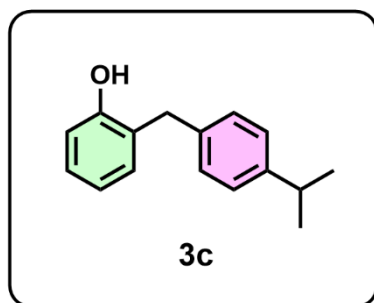

The titled compound (3c) was synthesized by using GP-A using phenol (1.0 mmol) and 4-isopropylbenzyl alcohol (1.5 mmol). Crude was separated and purified by chromatographic method on 100-200 mesh silica gel (gradient from 0.5-2% ethyl acetate/n-hexanes solvent system) to afford 3c as a brown-yellow liquid (86% yield). **NMR Analysis:** <sup>1</sup>H NMR (400 MHz, CDCl<sub>3</sub>): δ 7.16 – 7.09 (m, 6H), 6.88 (t, *J* = 7.4 Hz, 1H), 6.77 (d, *J* = 8.1 Hz, 1H), 4.75 (s, 1H), 3.96 (s, 2H), 2.92 – 2.81 (m, 1H), 1.22 (d, *J* = 6.9 Hz, 6H). <sup>13</sup>C NMR (126 MHz, CDCl<sub>3</sub>): δ 153.9, 147.1, 137.1, 131.1, 128.7, 127.9, 127.2, 126.9, 121.0, 115.9, 36.2, 33.8, 24.2. **FTIR (KBr):** 3531, 3021, 2960, 2926, 2870, 1607, 1592, 1511, 1489, 1455, 1328, 1257, 1212, 1090, 814, 752 cm<sup>-1</sup>. **LRMS (ESI):** m/z calculated for C<sub>16</sub>H<sub>17</sub>O [M-H]<sup>+</sup>: 225.1, found 225.1 (100%). **Elemental Analysis:** Anal. calcd for C<sub>16</sub>H<sub>18</sub>O: C, 84.91; H, 8.02; found: C, 85.13, H, 8.16. The reported data of synthesized compound 3c are in accordance with the literature report.

### Compound 3d: 2-(4-methoxybenzyl)phenol <sup>15</sup>

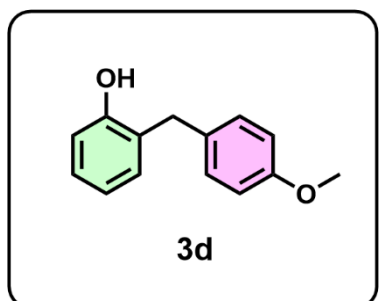

The compound 3d was synthesized by using GP-A using phenol (1.0 mmol) and 4-methoxybenzyl alcohol (1.5 mmol). After completion of the reaction under standard optimized parameters, the final product was collected after column chromatography on 100-200 mesh silica gel (gradient from 0-5% ethyl acetate/n-hexanes solvent system). Isolated pure product appeared as a brown-white solid (89% yield). **NMR Analysis:** <sup>1</sup>H NMR (400 MHz, CDCl<sub>3</sub>): δ 7.13 (dd, *J* = 11.8, 8.9 Hz, 4H), 6.89 (t, *J* = 7.0 Hz, 1H), 6.83 (d, *J* = 8.6 Hz, 2H), 6.78 (d, *J* = 8.0 Hz, 1H), 4.66 (s, 1H), 3.94 (s, 2H), 3.78 (s, 3H). <sup>13</sup>C NMR (126 MHz, CDCl<sub>3</sub>): δ 158.3, 153.9, 131.8, 131.0, 129.8, 127.9, 127.4, 121.0,

## Supporting Information

115.9, 114.2, 55.4, 35.7. **FTIR (KBr):** 3354, 3033, 2991, 2919, 2841, 1607, 1593, 1508, 1454, 1357, 1238, 1179, 1027, 912, 812, 759, 675  $\text{cm}^{-1}$ . **LRMS (ESI):**  $m/z$  calculated for  $\text{C}_{14}\text{H}_{13}\text{O}_2$   $[\text{M}-\text{H}]^+$ : 213.1, found 213.1 (100%). **Elemental Analysis:** Anal. calcd for  $\text{C}_{14}\text{H}_{14}\text{O}_2$ : C, 78.48; H, 6.59; found: C, 78.72, H, 6.62. The reported characterization data of compound 3d are in matched with the literature.

### Compound 3e: 2-([1,1'-biphenyl]-4-ylmethyl)phenol <sup>16</sup>

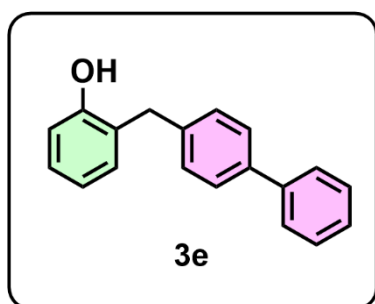

The compound 3e was synthesized by using GP-A using phenol (1.0 mmol) and biphenyl-4-methanol (1.5 mmol). The crude was separated after completion of the reaction under optimized conditions and purified by silica gel column chromatographic method (gradient from 100% n-hexanes to 1.5% ethyl acetate/n-hexanes solvent system) to give 3e as a white solid (72% isolated yield). **NMR Analysis:**  $^1\text{H}$  NMR (400 MHz,  $\text{CDCl}_3$ ):  $\delta$  7.59 – 7.49 (m, 4H), 7.42 (t,  $J = 7.6$  Hz, 2H), 7.31 (dd,  $J = 12.6, 7.7$  Hz, 3H), 7.15 (dd,  $J = 9.8, 7.6$  Hz, 2H), 6.91 (t,  $J = 7.4$  Hz, 1H), 6.80 (d,  $J = 7.9$  Hz, 1H), 4.69 (s, 1H), 4.04 (s, 2H).  $^{13}\text{C}$  NMR (126 MHz,  $\text{CDCl}_3$ ):  $\delta$  153.9, 141.1, 139.5, 139.2, 131.2, 129.2, 128.9, 128.0, 127.5, 127.2, 121.2, 115.9, 36.1. **FTIR (KBr):** 3366, 3055, 3030, 2925, 2852, 1588, 1499, 1486, 1454, 1232, 1111, 1040, 861, 752, 696  $\text{cm}^{-1}$ . **LRMS (ESI):**  $m/z$  calculated for  $\text{C}_{19}\text{H}_{15}\text{O}$   $[\text{M}-\text{H}]^+$ : 259.1, found 259.1 (100%). **Elemental Analysis:** Anal. calcd for  $\text{C}_{19}\text{H}_{16}\text{O}$ : C, 87.66; H, 6.20; found: C, 87.90, H, 6.53. All the characterization data are in good matched with the previous report.

### Compound 3f: 2-(benzo[d][1,3]dioxol-5-ylmethyl)phenol

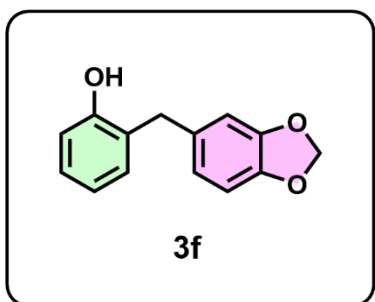

Compound 3f was prepared by using the GP-A taking phenol (1.0 mmol) along with benzo[d][1,3]dioxol-5-ylmethanol (1.5 mmol) under optimized condition. The organic product was isolated and separated by column chromatographic technique using 100-200 mesh silica gel (gradient from 0-5% ethyl acetate/n-hexanes solvent system), afforded to 3f as brown semi-solid (65% yield) **NMR Analysis:**  $^1\text{H}$  NMR (400 MHz,  $\text{CDCl}_3$ ):  $\delta$  7.14 – 7.08 (m, 2H), 6.89 (t,  $J = 7.4$  Hz, 1H), 6.73 (ddd,  $J = 13.5, 12.1, 6.2$  Hz, 4H), 5.91 (s, 2H), 4.74 (s, 1H), 3.91 (s, 2H).  $^{13}\text{C}$  NMR (126 MHz,  $\text{CDCl}_3$ ):  $\delta$  154.0, 148.1, 146.3, 133.8, 131.0, 128.0, 127.2, 121.5, 121.1, 115.9, 109.3, 108.4, 101.0, 36.3. **FTIR (KBr):** 3460, 3067, 2920, 1607, 1501, 1488, 1455, 1443, 1243, 1186, 1039, 927, 846, 810, 754  $\text{cm}^{-1}$ . **LRMS (ESI):**  $m/z$  calculated for  $\text{C}_{14}\text{H}_{11}\text{O}_3$   $[\text{M}-\text{H}]^+$ : 227.1, found 227.1 (100%). **Elemental Analysis:** Anal. calcd for  $\text{C}_{14}\text{H}_{12}\text{O}_3$ : C, 73.67; H, 5.30; found: C, 73.85, H, 5.39.

### Compound 3g: 2-cinnamylphenol <sup>17</sup>

## Supporting Information

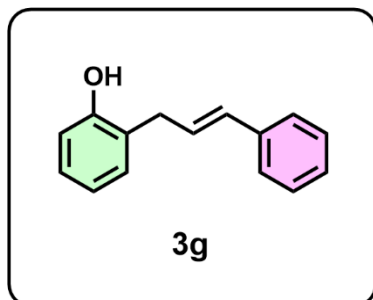

Prepared the compound (3g) using GP-A taking phenol (1.0 mmol), and cinnamyl alcohol (1.5 mmol) in 1 mL DCE at 80 °C for 6 h. The final organic product was purified by silica gel column chromatographic method (30 cm long column pack) 100-200 mesh silica gel (n-hexanes/EtOAc 100:0 to 99:1 v/v). The obtained product 3g was collected as a yellow liquid (88% yield). **NMR Analysis:**  $^1\text{H NMR}$  (400 MHz,  $\text{CDCl}_3$ ):  $\delta$  7.37 – 7.26 (m, 4H), 7.24 – 7.10 (m, 3H), 6.90 (t,  $J = 7.4$  Hz, 1H), 6.81 (d,  $J = 8.0$  Hz, 1H), 6.51 (d,  $J = 15.9$  Hz, 1H), 6.38 (dt,  $J = 15.9, 6.4$  Hz, 1H), 4.92 (s, 1H), 3.57 (d,  $J = 6.3$  Hz, 2H).  $^{13}\text{C NMR}$  (151 MHz,  $\text{CDCl}_3$ ):  $\delta$  154.1, 137.2, 131.6, 130.6, 128.7, 128.0, 127.4, 126.3, 125.8, 121.1, 115.9, 34.2. **FTIR (KBr):** 3418, 3028, 2925, 2852, 1660, 1624, 1595, 1496, 1455, 1234, 1169, 1098, 968, 833, 753, 737, 692  $\text{cm}^{-1}$ . **LRMS (ESI):** m/z calculated for  $\text{C}_{15}\text{H}_{13}\text{O}$   $[\text{M}-\text{H}]^+$ : 209.1, found 209.1 (100%). **Elemental Analysis:** Anal. calcd for  $\text{C}_{15}\text{H}_{14}\text{O}$ : C, 85.68; H, 6.71; found: C, 85.79, H, 6.83. The spectral information of the compound is matched with previous reports.

### Compound 3h: 2-cinnamyl-4-methylphenol <sup>18</sup>

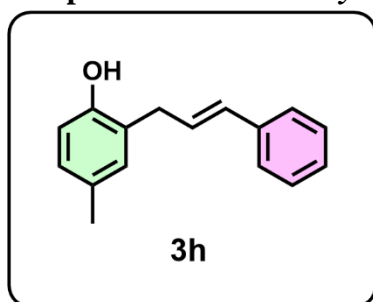

Prepared 3h applying GP-A taking p-cresol (1.0 mmol), and cinnamyl alcohol (1.5 mmol) in 1 mL of optimized solvent at 80 °C for 6 h. The product was purified and separated by silica gel column chromatographic process using 100-200 mesh silica gel (taking gradient from n-hexanes/EtOAc 100:0 to 99:1 v/v). The obtained product 3h was collected as a yellow oil (89% yield). **NMR Analysis:**  $^1\text{H NMR}$  (400 MHz,  $\text{CDCl}_3$ ):  $\delta$  7.38 – 7.26 (m, 4H), 7.20 (t,  $J = 7.2$  Hz, 1H), 6.94 (dd,  $J = 13.0, 5.0$  Hz, 2H), 6.71 (d,  $J = 8.0$  Hz, 1H), 6.50 (d,  $J = 15.9$  Hz, 1H), 6.37 (dt,  $J = 15.8, 6.5$  Hz, 1H), 4.81 (s, 1H), 3.52 (d,  $J = 6.3$  Hz, 2H), 2.26 (s, 3H).  $^{13}\text{C NMR}$  (126 MHz,  $\text{CDCl}_3$ ):  $\delta$  151.9, 137.3, 131.5, 131.1, 130.3, 128.7, 128.4, 128.2, 127.4, 126.3, 125.6, 115.7, 34.2, 20.6. **FTIR (KBr):** 3420, 3025, 2923, 2854, 1612, 1508, 1448, 1259, 1205, 1106, 966, 812, 748, 692  $\text{cm}^{-1}$ . **LRMS (ESI):** m/z calculated for  $\text{C}_{16}\text{H}_{15}\text{O}$   $[\text{M}-\text{H}]^+$ : 223.1, found 223.1 (100%). **Elemental Analysis:** Anal. calcd for  $\text{C}_{16}\text{H}_{16}\text{O}$ : C, 85.68; H, 7.19; found: C, 85.78, H, 7.26. The characterization data matches with previously reported data.

### Compound 3i: 2-benzyl-4-methylphenol <sup>16</sup>

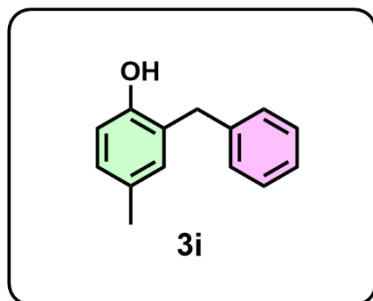

The compound 3i was synthesized by using GP-A using p-cresol (1.0 mmol) and benzyl alcohol (1.5 mmol). After completion under standard conditions, the organic crude part was separated and purified by silica gel column chromatography on 100-200 mesh silica gel (gradient from 0-1% ethyl acetate/n-hexanes solvent system) to afford 3i as a colorless oil (84% yield)  $^1\text{H NMR}$  (400 MHz,  $\text{CDCl}_3$ ):  $\delta$  7.23 (tt,  $J = 14.9, 7.2$  Hz, 5H), 6.91 (d,  $J = 6.7$  Hz, 2H), 6.66 (d,  $J = 8.7$  Hz, 1H), 4.91 (s, 1H), 3.95 (s, 2H), 2.24 (s, 3H).  $^{13}\text{C NMR}$  (151 MHz,  $\text{CDCl}_3$ ):  $\delta$  151.6, 140.3, 131.6, 130.1, 128.8, 128.7,

## Supporting Information

128.3, 126.9, 126.4, 36.4, 20.6. **FTIR (KBr):** 3380, 2979, 2923, 2853, 1740, 1511, 1485, 1463, 1376, 1206, 1040, 859, 806, 760  $\text{cm}^{-1}$ . **LRMS (ESI):**  $m/z$  calculated for  $\text{C}_{14}\text{H}_{13}\text{O}$   $[\text{M}-\text{H}]^+$ : 197.1, found 197.1 (100%). **Elemental Analysis:** Anal. calcd for  $\text{C}_{14}\text{H}_{14}\text{O}$ : C, 84.81; H, 7.12; found: C, 85.01, H, 7.17. The spectral data accordance with previously reported data.

### Compound 3j: 4-methyl-2-(4-methylbenzyl)phenol

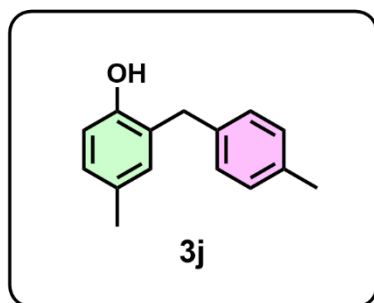

The titled compound (3j) was prepared by applying GP-A taking p-cresol (1.0 mmol) and 4-methylbenzyl alcohol (1.5 mmol) as reactant. After completion, the required organic product was isolated and purified by silica gel column chromatographic technique using 100-200 mesh silica gel (gradient from 0-2% ethyl acetate/n-hexanes solvent system) to afford 3j as a colorless oil (86%).  **$^1\text{H}$  NMR (400 MHz,  $\text{CDCl}_3$ ):**  $\delta$  7.14 – 7.06 (m, 4H), 6.91 (d,  $J = 7.6$  Hz, 2H), 6.67 (d,  $J = 7.8$  Hz, 1H), 4.55 (s, 1H), 3.91 (s, 2H), 2.31 (s, 3H), 2.25 (s, 3H).  **$^{13}\text{C}$  NMR (151 MHz,  $\text{CDCl}_3$ ):**  $\delta$  151.6, 136.9, 136.0, 131.6, 130.2, 129.5, 128.6, 128.3, 127.0, 115.8, 36.2, 21.2, 20.6. **FTIR (KBr):** 3339, 3026, 2923, 2853, 1601, 1509, 1493, 1449, 1427, 1258, 1210, 1120, 1031, 883, 832, 777, 725, 692, 623  $\text{cm}^{-1}$ . **LRMS (ESI):**  $m/z$  calculated for  $\text{C}_{15}\text{H}_{15}\text{O}$   $[\text{M}-\text{H}]^+$ : 211.1, found 211.1 (100%). **Elemental Analysis:** Anal. calcd for  $\text{C}_{15}\text{H}_{16}\text{O}$ : C, 84.87; H, 7.60; found: C, 85.12, H, 7.72.

### Compound 3k: 2-(4-isopropylbenzyl)-4-methylphenol

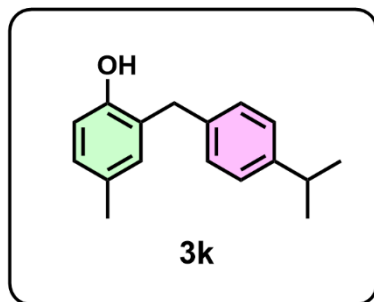

Prepared from the standard GP-A using p-cresol (1.0 mmol) and 4-isopropylbenzyl alcohol (1.5 mmol) as starting materials. After completion, the pure product was isolated from crude materials and purified by chromatographic technique using silica gel (60-120 mesh) with appropriate solvent system (1.5-5% ethyl acetate/n-hexanes) affording to 3k as colorless oil (86% yield). **NMR Analysis:**  **$^1\text{H}$  NMR (400 MHz,  $\text{CDCl}_3$ ):**  $\delta$  7.14 (s, 4H), 6.95 – 6.89 (m, 2H), 6.68 (d,  $J = 8.0$  Hz, 1H), 4.55 (s, 1H), 3.92 (s, 2H), 2.87 (hept,  $J = 6.9$  Hz, 1H), 2.25 (s, 3H), 1.22 (d,  $J = 6.9$  Hz, 6H).  **$^{13}\text{C}$  NMR (151 MHz,  $\text{CDCl}_3$ ):**  $\delta$  151.7, 147.0, 137.3, 131.7, 130.2, 128.6, 128.3, 126.9, 126.9, 115.8, 36.2, 33.8, 24.1, 20.7. **FTIR (KBr):** 3435, 3011, 2959, 2924, 2868, 1613, 1510, 1462, 1418, 1382, 1259, 1187, 1106, 812, 720  $\text{cm}^{-1}$ . **LRMS (ESI):**  $m/z$  calculated for  $\text{C}_{17}\text{H}_{19}\text{O}$   $[\text{M}-\text{H}]^+$ : 239.1, found 239.1 (100%). **Elemental Analysis:** Anal. calcd for  $\text{C}_{17}\text{H}_{20}\text{O}$ : C, 84.96; H, 8.39; found: C, 85.12, H, 8.41.

### Compound 3l: 2-benzyl-4-methoxyphenol<sup>16</sup>

## Supporting Information

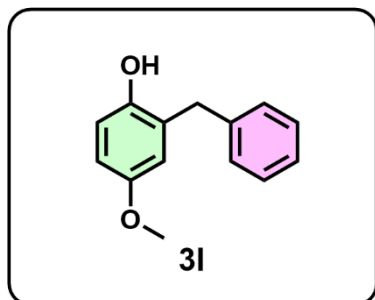

Prepared the mentioned compound 3l using the standard GP-A using 4-methoxy phenol (1.0 mmol) and benzyl alcohol (1.5 mmol) as starting materials. Under standard condition, the crude product was isolated and refined by silica gel column chromatography packing with silica (60-120 mesh) with using 1.5% to 7 % ethyl acetate/n-hexanes solvent system producing 3l as colorless oil (88% yield). **NMR Analysis:**  $^1\text{H NMR}$  (500 MHz,  $\text{CDCl}_3$ ):  $\delta$  7.29 (t,  $J = 7.5$  Hz, 2H), 7.21 (dd,  $J = 12.9, 7.1$  Hz, 3H), 6.73 (d,  $J = 8.3$  Hz, 1H), 6.70 – 6.64 (m, 2H), 4.35 (s, 1H), 3.96 (s, 2H), 3.73 (s, 3H).  $^{13}\text{C NMR}$  (101 MHz,  $\text{CDCl}_3$ ):  $\delta$  153.9, 147.8, 139.8, 128.8, 128.3, 126.5, 116.8, 116.6, 112.5, 55.8, 36.8. **FTIR (KBr):** 3325, 3085, 3027, 2921, 2835, 1600, 1508, 1494, 1438, 1388, 1266, 1213, 1187, 1039, 801, 726, 696  $\text{cm}^{-1}$ . **LRMS (ESI):** m/z calculated for  $\text{C}_{14}\text{H}_{13}\text{O}_2$  [M-H] $^+$ : 213.1, found 213.1 (100%). **Elemental Analysis:** Anal. calcd for the  $\text{C}_{14}\text{H}_{14}\text{O}_2$ : C, 78.48; H, 6.59; found: C, 78.56, H, 6.53. The data are in good agreement with the previous literature reports.

### Compound 3m: 2-(4-chlorobenzyl)-4-methoxyphenol

The titled compound 3m was synthesized by applying the standard GP-A taking 4-methoxy phenol (1.0 mmol) and 4-chlorobenzyl alcohol (1.5 mmol) as starting materials. After completion, the crude product was isolated and purified by column chromatography with silica gel (60-120 mesh) with solvent gradient from 1% to 5 % ethyl acetate/n-hexanes producing 3m as colorless oil (54% yield).

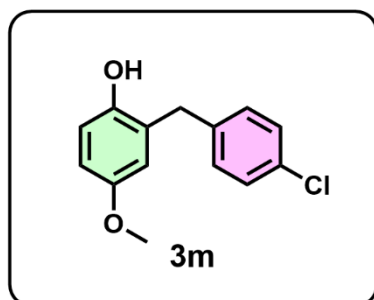

$^1\text{H NMR}$  (500 MHz,  $\text{CDCl}_3$ ):  $\delta$  7.26 – 7.22 (m, 2H), 7.15 (d,  $J = 8.3$  Hz, 2H), 6.70 (d,  $J = 8.3$  Hz, 1H), 6.68 – 6.63 (m, 2H), 4.48 (s, 1H), 3.91 (s, 2H), 3.73 (s, 3H).  $^{13}\text{C NMR}$  (101 MHz,  $\text{CDCl}_3$ ):  $\delta$  153.9, 147.6, 138.6, 132.1, 130.2, 128.7, 128.0, 116.7, 116.4, 112.5, 55.8, 35.9. **FTIR (KBr):** 3376, 2926, 2850, 1602, 1508, 1491, 1436, 1270, 1208, 1089, 1036, 840, 823, 742, 717  $\text{cm}^{-1}$ . **LRMS (ESI):** m/z calculated for  $\text{C}_{14}\text{H}_{12}\text{ClO}_2$  [M-H] $^+$ : 247.0, found 247.0 (100%). **Elemental Analysis:** Anal. calcd for  $\text{C}_{14}\text{H}_{13}\text{ClO}_2$ : C, 67.61; H, 5.27; found: C, 67.82, H, 5.35.

### Compound 3n: 4-methyl-2-(thiophen-2-ylmethyl)phenol

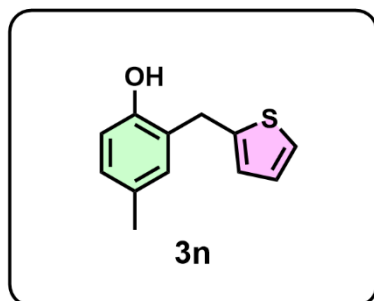

Compound 3n was produced by using the standard GP-A taking p-cresol (1.0 mmol) and 2-Thiophenemethanol (1.5 mmol) as starting reactant materials. After completion of the reaction, product was isolated and purified by silica gel column chromatography. The chromatographic method was executed by using silica gel (100-200 mesh) with solvent pair gradient from 0.5% to 5 % ethyl acetate/n-hexanes affording the required product 3n as yellow oil (79% yield).  $^1\text{H NMR}$  (400 MHz,  $\text{CDCl}_3$ ):  $\delta$  7.15 (dd,  $J = 5.1, 1.1$  Hz, 1H), 6.97 (s, 1H), 6.96 – 6.90 (m, 2H), 6.84 (dd,  $J = 3.4, 1.0$  Hz, 1H), 6.69 (d,  $J = 8.1$  Hz, 1H), 4.69 (s, 1H), 4.13 (s, 2H), 2.26 (s, 3H).  $^{13}\text{C NMR}$  (126 MHz,  $\text{CDCl}_3$ ):  $\delta$  151.5, 143.3, 131.2, 130.4, 128.7, 127.0, 126.4, 125.3, 124.3, 115.9, 30.9, 20.6. **FTIR**

## Supporting Information

**(KBr):** 3421, 2923, 2853, 1612, 1508, 1434, 1324, 1262, 1188, 1097, 1037, 850, 812, 696  $\text{cm}^{-1}$ . **LRMS (ESI):**  $m/z$  calculated for  $\text{C}_{12}\text{H}_{13}\text{OS}^+$   $[\text{M}+\text{H}]^+$ : 205.1, found 205.1 (100%). **Elemental Analysis:** Anal. calcd for  $\text{C}_{12}\text{H}_{12}\text{OS}$ : C, 70.55; H, 6.92; found: C, 70.69, H, 6.98.

### Compound 3o: 4-benzyl-2,6-dimethylphenol<sup>19</sup>

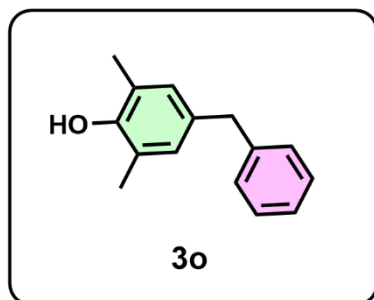

Compound 3o was synthesized via standard GP-A by using 2,6-dimethyl phenol (1.0 mmol) and benzyl alcohol (1.5 mmol) as reactant. After completion of the reaction, the final product was purified by column chromatography taking 100-200 mesh silica gel (using solvent system from 100% n-hexanes to 3 % ethyl acetate/n-hexanes affording to 3o as white solid (43% yield). **<sup>1</sup>H NMR (400 MHz,  $\text{CDCl}_3$ ):**  $\delta$  7.28 (d,  $J$  = 7.8 Hz, 2H), 7.18 (dd,  $J$  = 7.1, 5.2 Hz, 3H), 6.80 (s, 2H), 4.46 (s, 1H), 3.84 (s, 2H), 2.20 (s, 6H). **<sup>13</sup>C NMR (151 MHz,  $\text{CDCl}_3$ ):**  $\delta$  150.6, 141.9, 132.9, 129.2, 128.9, 128.5, 41.2, 16.0. **FTIR (KBr):** 3392, 3065, 3025, 2922, 2850, 1602, 1492, 1451, 1347, 1303, 1211, 1146, 1029, 878, 779, 726, 695  $\text{cm}^{-1}$ . **LRMS (ESI):**  $m/z$  calculated for  $\text{C}_{15}\text{H}_{15}\text{O}$   $[\text{M}-\text{H}^+]$ : 211.1, found 211.1 (100%). **Elemental Analysis:** Anal. calcd for  $\text{C}_{15}\text{H}_{16}\text{O}$ : C, 84.87; H, 7.60; found: C, 85.01, H, 7.69. The characterization data of the synthesized compound are in accordance with the reported data.

### Characterization data for oxidative coupling reaction (5a-5h)

The isolated C-C coupling products (5a-5h) were characterized by analytical tools such as <sup>1</sup>H-NMR, <sup>13</sup>C-NMR, FT-IR, LCMS mass spectra, elemental analysis HRMS analysis.

### ❖ Compound 5a: [1,1'-binaphthalene]-2,2'-diol<sup>10</sup>

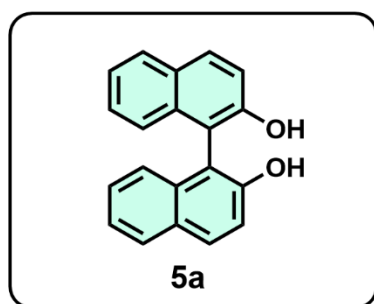

[1,1'-binaphthalene]-2,2'-diol (5a) was synthesized by acquiring general procedure C (GP-C) taking 2-naphthol (2 mmol) as substrate. The final product was isolated and purified by using silica gel (60-120 mesh) column chromatographic technique (eluent- ethyl acetate/n-hexanes) produced 5a as gray solid (91% yield). **NMR Analysis: <sup>1</sup>H NMR (500 MHz,  $\text{CDCl}_3$ ):**  $\delta$  7.98 (d,  $J$  = 8.9 Hz, 2H), 7.89 (d,  $J$  = 8.0 Hz, 2H), 7.37 (dd,  $J$  = 11.7, 4.8 Hz, 4H), 7.31 (t,  $J$  = 8.1 Hz, 2H), 7.15 (d,  $J$  = 8.4 Hz, 2H), 5.06 (s, 2H). **<sup>13</sup>C NMR (126 MHz,  $\text{CDCl}_3$ ):**  $\delta$  152.9, 133.5, 131.6, 129.6, 128.6, 127.6, 124.3, 124.2, 117.9, 111.0. **FTIR (KBr):** 3509, 3433, 3057, 1617, 1594, 1511, 1468, 1382, 1347, 1317, 1271, 1220, 1182, 1147, 1126, 979, 962, 950, 870, 815, 748, 663, 564  $\text{cm}^{-1}$ . **LRMS (ESI+):**  $m/z$  calculated  $\text{C}_{20}\text{H}_{14}\text{O}_2$   $[\text{M}-\text{H}]^+$ : 285.1, found: 285.1 (100%). **Elemental Analysis:** Anal. calcd for  $\text{C}_{20}\text{H}_{14}\text{O}_2$ : C, 80.90; H, 4.93; found: C, 80.78, H, 4.98. All the spectral data are according to the literature reports.

### ❖ Compound 5b: [1,1'-binaphthalene]-2,2',7,7'-tetraol<sup>20</sup>



## Supporting Information

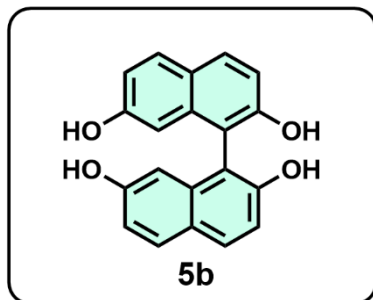

As described in GP-C 2,7-dihydroxynaphthalene (2 mmol) was taken as substrate. Compound [1,1'-binaphthalene]-2,2',7,7'-tetraol was isolated by silica gel (100-200 mesh) column chromatographic technique using the eluent ethyl acetate/n-hexanes solvent system (gradient from 5%-25%) as gray solid (94% yield). **NMR Analysis:**  $^1\text{H NMR}$  (600 MHz, MeOD):  $\delta$  7.76 (d,  $J = 8.8$  Hz, 2H), 7.70 (d,  $J = 8.8$  Hz, 2H), 7.10 (d,  $J = 8.8$  Hz, 2H), 6.86 (d,  $J = 8.7$  Hz, 2H), 6.44 (s, 2H) ppm.  $^{13}\text{C NMR}$  (151 MHz, MeOD):  $\delta$  156.8, 154.5, 137.4, 130.6, 130.3, 125.5, 116.2, 115.9, 114.7, 107.7 ppm. **FTIR (KBr):** 3489, 3325, 2924, 1621, 1514, 1450, 1392, 1369, 1343, 1297, 1213, 1162, 1187, 1138, 962, 880, 826, 681, 635, 569, 485  $\text{cm}^{-1}$ . **LRMS (ESI+):**  $m/z$  calculated  $\text{C}_{20}\text{H}_{13}\text{O}_4$   $[\text{M}-\text{H}]^+$ : 317.1, found: 317.1 (100%). **Elemental Analysis:** Anal. calcd for  $\text{C}_{20}\text{H}_{14}\text{O}_4$ : C, 75.46; H, 4.43; found: C, 75.58, H, 4.53. The spectral information are good agreement with the previous report.

### ❖ Compound 5c: 7,7'-dimethoxy-[1,1'-binaphthalene]-2,2'-diol <sup>21</sup>

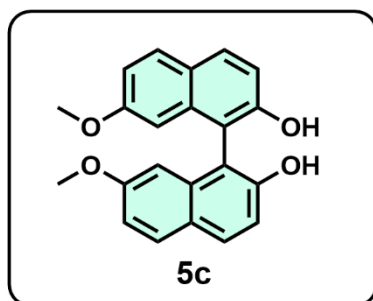

The title compound 7,7'-dimethoxy-[1,1'-binaphthalene]-2,2'-diol (5c) was produced by applying the described GP-C and the compound were isolated by column chromatography taking silica gel (mesh 60-120) with eluent: ethyl acetate/n-hexanes (gradient from 5-15%). The final product was collected as pinkish-gray solid (92%). **NMR Analysis:**  $^1\text{H NMR}$  (400 MHz,  $\text{CDCl}_3$ ):  $\delta$  7.85 (d,  $J = 8.8$  Hz, 2H), 7.76 (d,  $J = 8.9$  Hz, 2H), 7.20 (d,  $J = 8.9$  Hz, 2H), 7.02 (dd,  $J = 8.9, 2.5$  Hz, 2H), 6.47 (d,  $J = 2.3$  Hz, 2H), 5.10 (s, 2H), 3.56 (s, 6H) ppm.  $^{13}\text{C NMR}$  (151 MHz,  $\text{CDCl}_3$ ):  $\delta$ (ppm) 159.2, 153.4, 134.8, 131.2, 130.1, 124.9, 116.1, 115.2, 110.2, 103.3, 55.3 ppm. **FTIR (KBr):** 3367, 2996, 2923, 2852, 1711, 1628, 1516, 1464, 1430, 1382, 1337, 1270, 1221, 1186, 1019, 978, 902, 816, 775, 598, 521  $\text{cm}^{-1}$ . **LRMS (ESI+):**  $m/z$  calculated  $\text{C}_{22}\text{H}_{17}\text{O}_4$   $[\text{M}-\text{H}]^+$ : 345.1, found: 345.1 (100%). **Elemental Analysis:** Anal. calcd for  $\text{C}_{22}\text{H}_{18}\text{O}_4$ : C, 76.29; H, 5.24; found: C, 76.40, H, 5.31. The characterization data are matched with previous ones.

### ❖ Compound 5d: [1,1'-binaphthalene]-2,2',3,3'-tetraol <sup>20</sup>

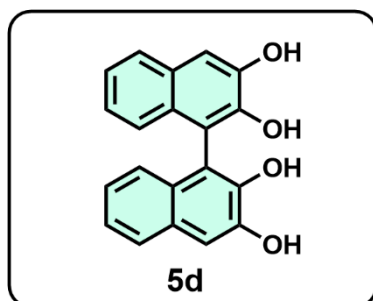

Compound named [1,1'-binaphthalene]-2,2',3,3'-tetraol (5d) was synthesized by as described the GP-C. The gray solid product was isolated by silica (60-120 mesh) gel column chromatography with solvent gradient from 15-35% ethyl acetate/n-hexanes system (88%). **NMR Analysis:**  $^1\text{H NMR}$  (400 MHz, MeOD):  $\delta$  7.67 (d,  $J = 8.1$  Hz, 2H), 7.30 (s, 2H), 7.21 (t,  $J = 7.4$  Hz, 2H), 7.02 (t,  $J = 7.6$  Hz, 2H), 6.95 (d,  $J = 8.2$  Hz, 2H) ppm.  $^{13}\text{C NMR}$  (151 MHz, MeOD):  $\delta$  147.3, 145.8, 131.0, 130.3, 127.1, 125.7,

## Supporting Information

124.3, 124.2, 116.7, 110.4 ppm. **FTIR (KBr):** 3466, 3401, 2922, 2851, 2523, 1602, 1514, 1448, 1384, 1341, 1300, 1243, 1146, 1105, 921, 863, 829, 745, 699, 642, 532  $\text{cm}^{-1}$ . **LRMS (ESI):**  $m/z$  calculated  $\text{C}_{20}\text{H}_{13}\text{O}_4$   $[\text{M}-\text{H}]^+$ : 317.1, found: 317.1 (100%). **Elemental Analysis:** Anal. calcd for  $\text{C}_{20}\text{H}_{14}\text{O}_4$ : C, 75.46; H, 4.43; found: C, 75.55, H, 4.50. All the data regarding its characterization as good agreement with literature data.

### ❖ Compound 5e: dimethyl 2,2'-dihydroxy-[1,1'-binaphthalene]-6,6'-dicarboxylate <sup>22</sup>

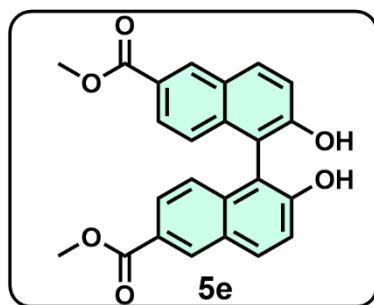

The title compound dimethyl 2,2'-dihydroxy-[1,1'-binaphthalene]-6,6'-dicarboxylate (5e) was produced via GP-C. The red-orange solid was collected after column chromatographic separation technique. The process used silica gel (60-120 mesh) and ethyl acetate/n-hexanes solvents system as eluent (yield: 85%). **NMR Analysis:**  $^1\text{H}$  NMR (400 MHz, DMSO):  $\delta$  9.81 (s, 2H), 8.59 (s, 2H), 8.10 (d,  $J = 9.0$  Hz, 2H), 7.69 (dd,  $J = 8.9, 1.7$  Hz, 2H), 7.42 (d,  $J = 8.9$  Hz, 2H), 7.01 (d,  $J = 8.9$  Hz, 2H), 3.86 (s, 6H) ppm.  $^{13}\text{C}$  NMR (151 MHz,  $\text{CDCl}_3$ ):  $^{13}\text{C}$  NMR (151 MHz, DMSO)  $\delta$  166.5, 155.6, 136.5, 131.0, 130.8, 127.1, 125.1, 124.6, 123.4, 119.5, 115.1, 52.0 ppm. **FTIR (KBr):** 3419, 2921, 2852, 1650, 1438, 1407, 1316, 1288, 1141, 1022, 953, 709  $\text{cm}^{-1}$ . **LRMS (ESI):**  $m/z$  calculated  $\text{C}_{24}\text{H}_{17}\text{O}_6$   $[\text{M}-\text{H}]^+$ : 401.1, found: 401.1 (100%). **Elemental Analysis:** Anal. calcd for  $\text{C}_{24}\text{H}_{18}\text{O}_6$ : C, 71.64; H, 4.51; found: C, 71.87, H, 4.62. The crystal structure of the compound was also characterized and the required data and **CCDC-2295241** number were also provided. The spectral data of the compound are in matched with previous report.

### ❖ Compound 5f: 6,6'-dibromo-[1,1'-binaphthalene]-2,2'-diol <sup>23</sup>

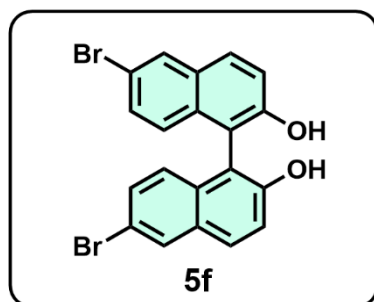

Compound 6,6'-dibromo-[1,1'-binaphthalene]-2,2'-diol (5f) was synthesized by using GP-C using 6-bromo-2-naphthol as starting materials. The gray solid was isolated and collected from silica column. The yield of 5f was 84%. **NMR Analysis:**  $^1\text{H}$  NMR (400 MHz,  $\text{CDCl}_3$ ):  $\delta$  8.05 (d,  $J = 1.8$  Hz, 2H), 7.89 (d,  $J = 8.9$  Hz, 2H), 7.43 – 7.33 (m, 4H), 6.96 (d,  $J = 8.9$  Hz, 2H), 5.06 (s, 2H).  $^{13}\text{C}$  NMR (151 MHz,  $\text{CDCl}_3$ ):  $\delta$  153.1, 132.0, 131.0, 130.8, 130.7, 130.6, 126.0, 119.1, 118.1, 110.8. **FTIR (KBr):** 3401, 3062, 2923, 2852, 1710, 1588, 1497, 1464, 1379, 1337, 1265, 1211, 1078, 965, 928, 877, 812, 751, 671, 549  $\text{cm}^{-1}$ . **LRMS (ESI):**  $m/z$  calculated  $\text{C}_{20}\text{H}_{13}\text{Br}_2\text{O}_2$   $[\text{M}+\text{H}]^+$ : 442.9, found: 442.9 (100%). **Elemental Analysis:** Anal. calcd for  $\text{C}_{20}\text{H}_{12}\text{Br}_2\text{O}_2$ : C, 54.09; H, 2.72; found: C, 54.18, H, 2.79. The compound 5f was characterized and the data are matched with reported data.

### ❖ Compound 5g: [1,1'-binaphthalene]-2,2',7-triol <sup>24</sup>

## Supporting Information

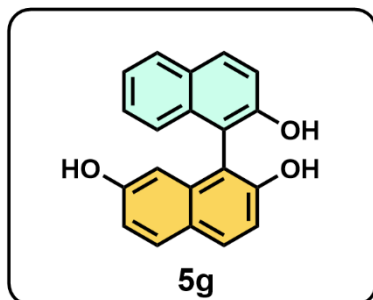

The cross product of 2-naphthol and 2,7-dihydroxynaphthalene, compound (5g) [1,1'-binaphthalene]-2,2',7-triol was synthesized by applying GP-C. The final product was collected from column chromatography using silica gel (60-120 mesh), with 7-11% ethyl acetate/n-hexanes solvent system. The product was collected as gray solid with 81% yield. **NMR Analysis:**  $^1\text{H NMR}$  (400 MHz,  $\text{CDCl}_3$ ):  $\delta$  7.97 (d,  $J = 8.9$  Hz, 1H), 7.92 – 7.86 (m, 2H), 7.79 (d,  $J = 8.8$  Hz, 1H), 7.41 – 7.35 (m, 2H), 7.32 (t,  $J = 6.9$  Hz, 1H), 7.22 (d,  $J = 8.9$  Hz, 1H), 7.17 (d,  $J = 8.3$  Hz, 1H), 6.97 (dd,  $J = 8.8, 2.5$  Hz, 1H), 6.41 (s, 1H), 5.21 (d,  $J = 118.6$  Hz, 3H).  $^{13}\text{C NMR}$  (151 MHz,  $\text{CDCl}_3$ ):  $\delta$  155.2, 153.6, 152.9, 135.1, 133.4, 131.6, 131.4, 130.6, 129.6, 128.6, 127.7, 124.9, 124.3, 124.2, 117.9, 115.7, 115.4, 111.0, 109.5, 106.5. **FTIR (KBr):** 3402, 2922, 2851, 1620, 1515, 1463, 1378, 1184, 972, 820, 748  $\text{cm}^{-1}$ . **LRMS (ESI):**  $m/z$  calculated for  $\text{C}_{20}\text{H}_{13}\text{O}_3$   $[\text{M}-\text{H}]^+$ : 301.1, found: 301.1 (100%). **Elemental Analysis:** Anal. calcd for  $\text{C}_{20}\text{H}_{14}\text{O}_3$ : C, 79.46; H, 4.67; found: C, 79.59, H, 4.63. The spectral data are in according to the previous one.

### ❖ Compound 5h: 6-bromo-[1,1'-binaphthalene]-2,2'-diol <sup>24</sup>

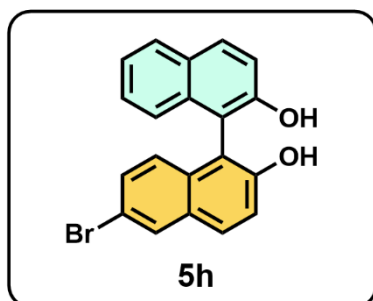

The cross product of 2-naphthol and 6-bromo-2-naphthol, compound (5h) 6-bromo-[1,1'-binaphthalene]-2,2'-diol was produced by using GP-C. The final product was isolated and collected from silica gel (60-120 mesh) column chromatography using appropriate solvents system (2-4% ethyl acetate/n-hexanes). The product was collected as white solid as 70% **NMR Analysis:**  $^1\text{H NMR}$  (400 MHz,  $\text{CDCl}_3$ ):  $\delta$  8.03 (d,  $J = 1.9$  Hz, 1H), 7.96 (d,  $J = 8.9$  Hz, 1H), 7.87 (t,  $J = 8.4$  Hz, 2H), 7.41 – 7.28 (m, 5H), 7.08 (d,  $J = 8.4$  Hz, 1H), 7.00 (d,  $J = 8.9$  Hz, 1H), 5.05 (d,  $J = 36.7$  Hz, 2H).  $^{13}\text{C NMR}$  (151 MHz,  $\text{CDCl}_3$ ):  $\delta$  153.1, 152.8, 133.4, 132.1, 131.8, 130.8, 130.7, 130.5, 130.5, 129.6, 128.6, 127.8, 126.2, 124.3, 124.1, 119.1, 118.0, 117.9, 111.4, 110.4. **FTIR (KBr):** 3421, 2924, 2853, 2347, 1594, 1460, 1377, 1176, 817, 747  $\text{cm}^{-1}$ . **LRMS (ESI):**  $m/z$  calculated for  $\text{C}_{20}\text{H}_{14}\text{BrO}_2$   $[\text{M}+\text{H}]^+$ : 365.0, found 365.0 (100%). **Elemental Analysis:** Anal. calcd for  $\text{C}_{20}\text{H}_{13}\text{BrO}_2$ : C, 65.77; H, 3.59; found: C, 65.91, H, 3.53. The spectral information of compound 5h is in good agreement with previous report.

## Supporting Information

### ❖ NMR Spectra of all synthesized products, Compound 3a-3o

#### • $^1\text{H}$ NMR and $^{13}\text{C}$ NMR Spectra of Compound 3a ( $\text{CDCl}_3$ )

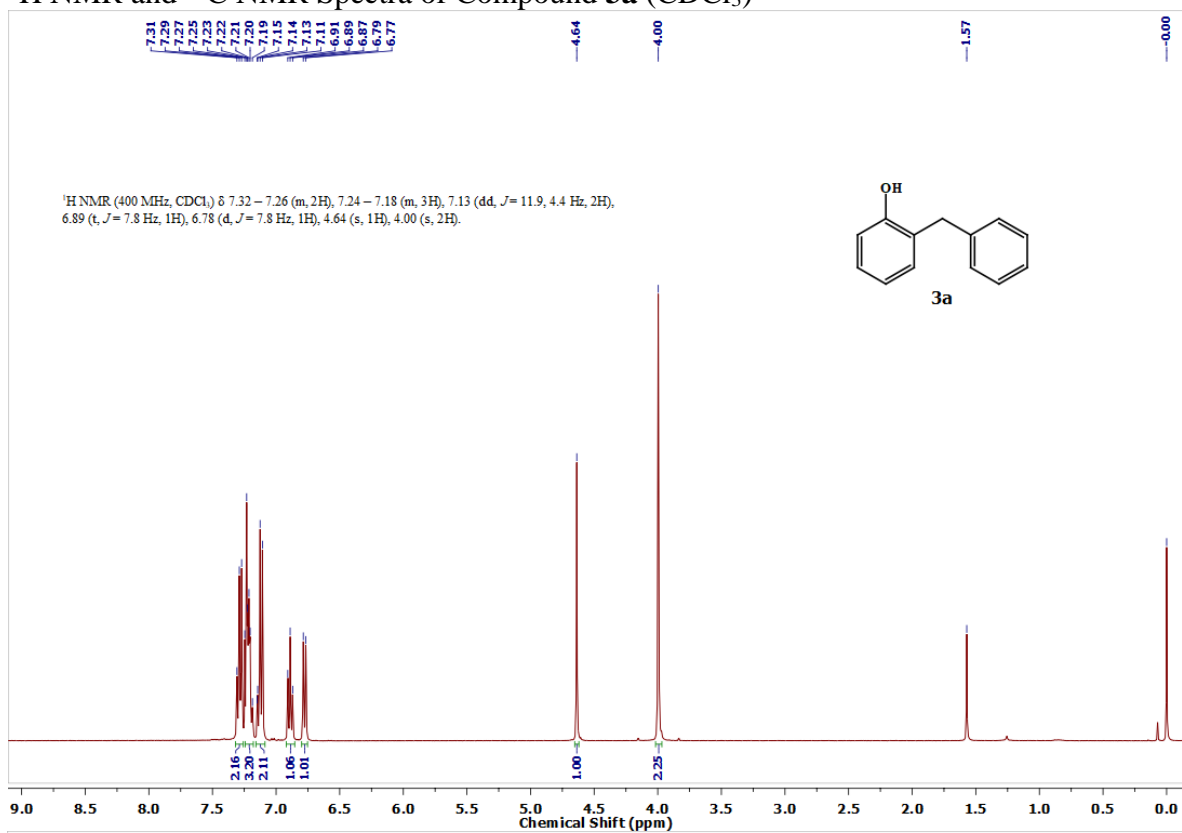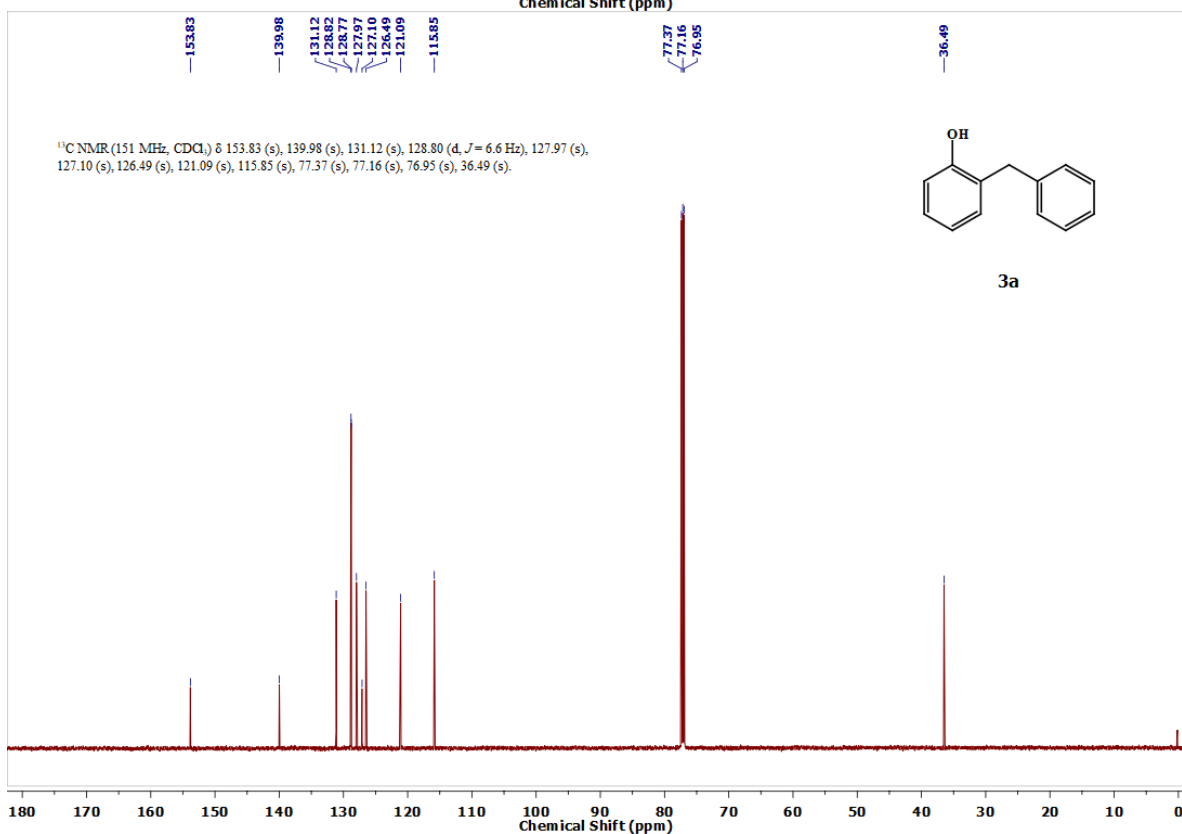

## Supporting Information

- $^1\text{H}$  NMR and  $^{13}\text{C}$  NMR Spectra of Compound **3b** ( $\text{CDCl}_3$ )

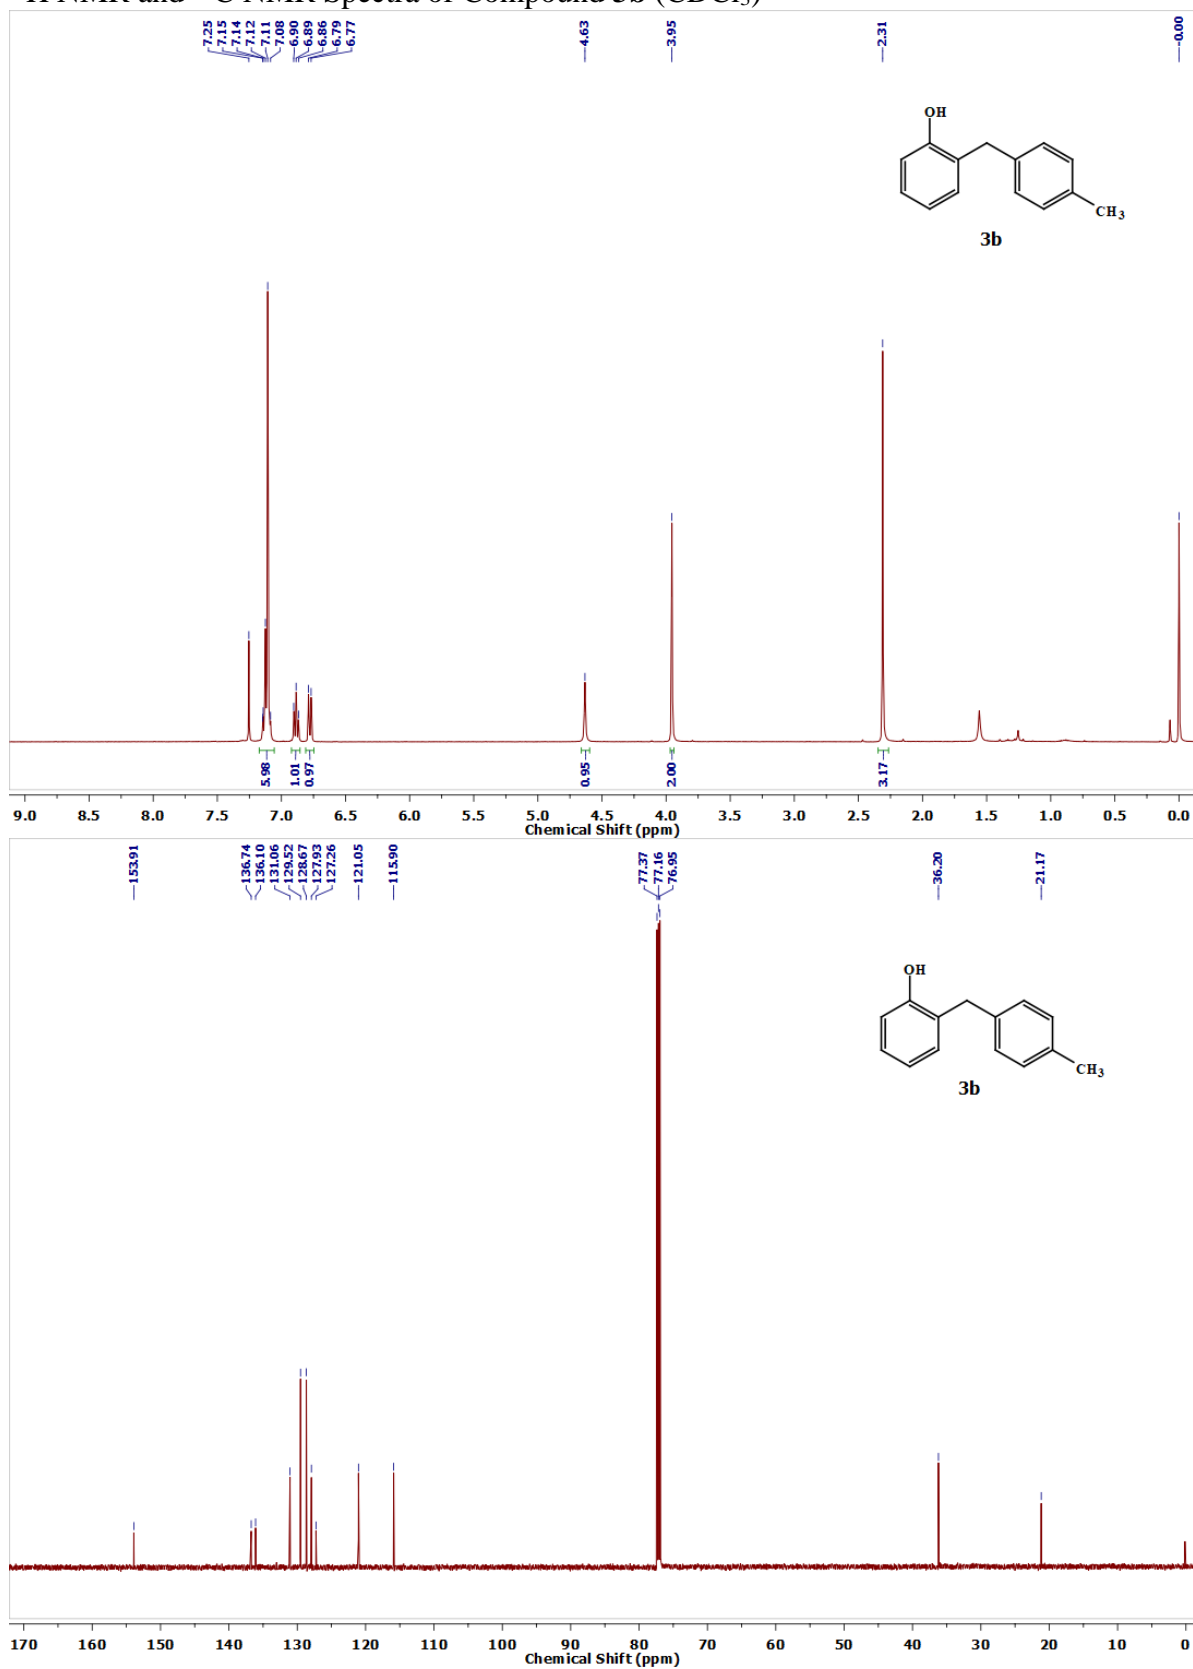

## Supporting Information

- $^1\text{H}$  NMR and  $^{13}\text{C}$  NMR Spectra of Compound **3c** ( $\text{CDCl}_3$ )

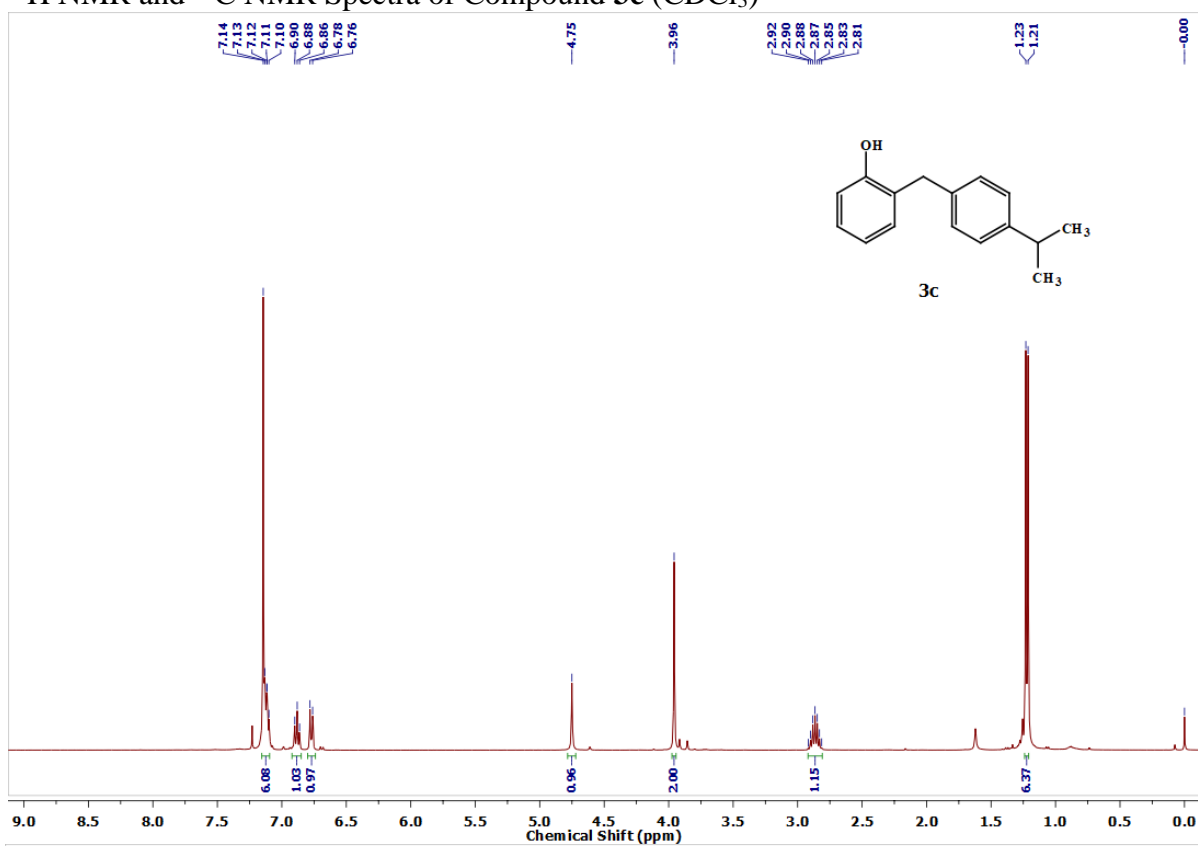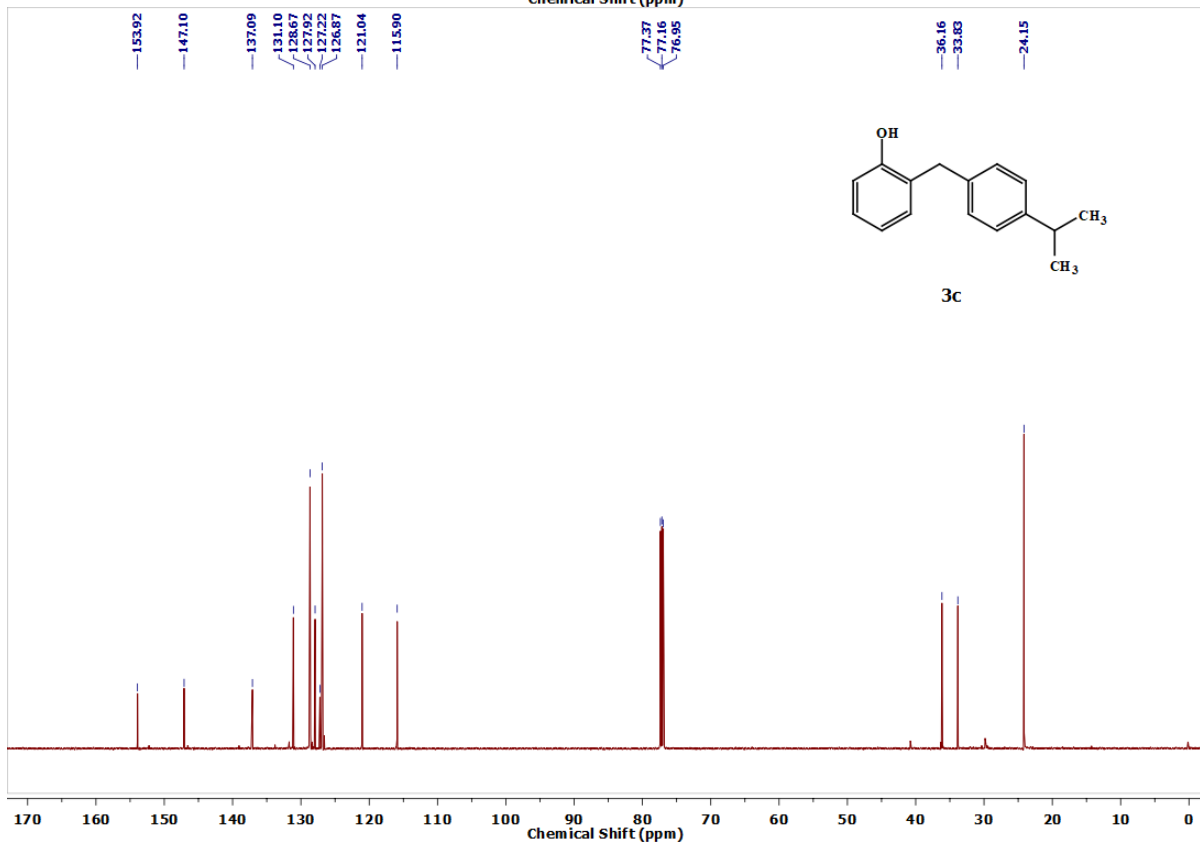

## Supporting Information

- $^1\text{H}$  NMR and  $^{13}\text{C}$  NMR Spectra of Compound **3d** ( $\text{CDCl}_3$ )

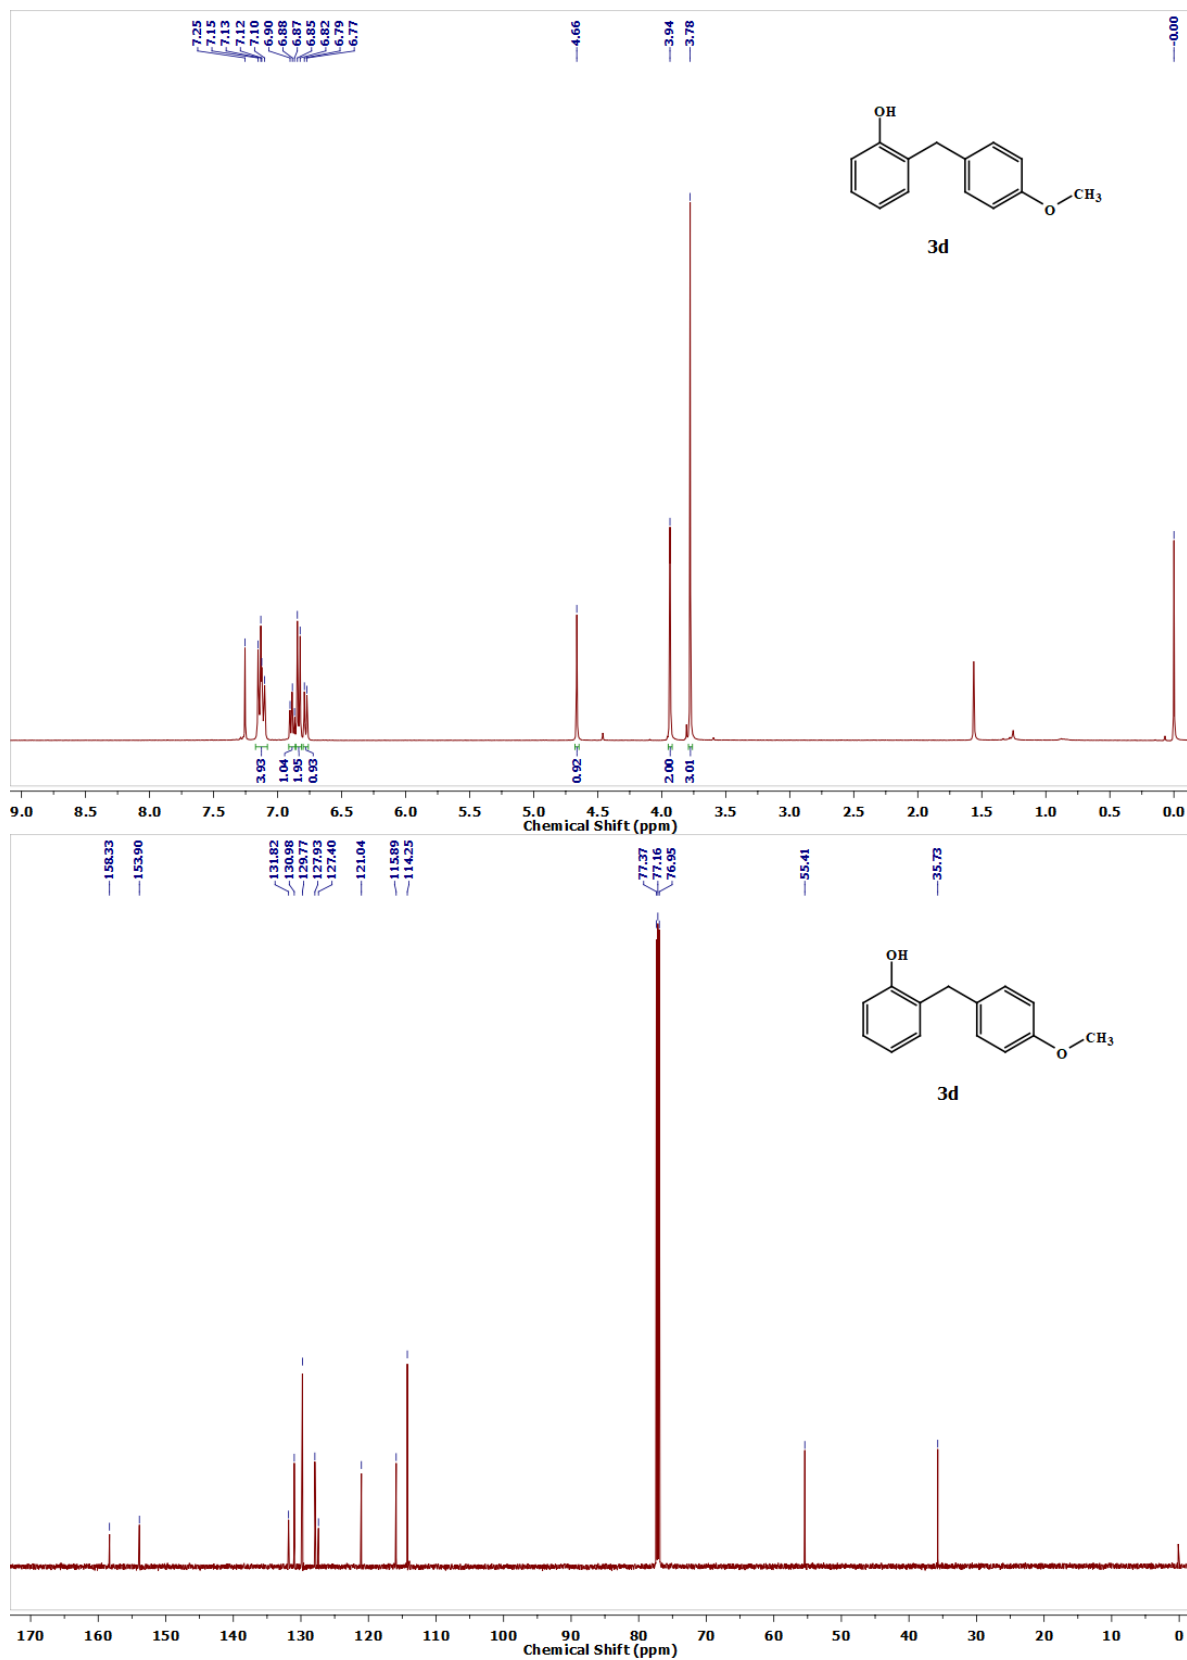

## Supporting Information

- $^1\text{H}$  NMR and  $^{13}\text{C}$  NMR Spectra of Compound **3e** ( $\text{CDCl}_3$ )

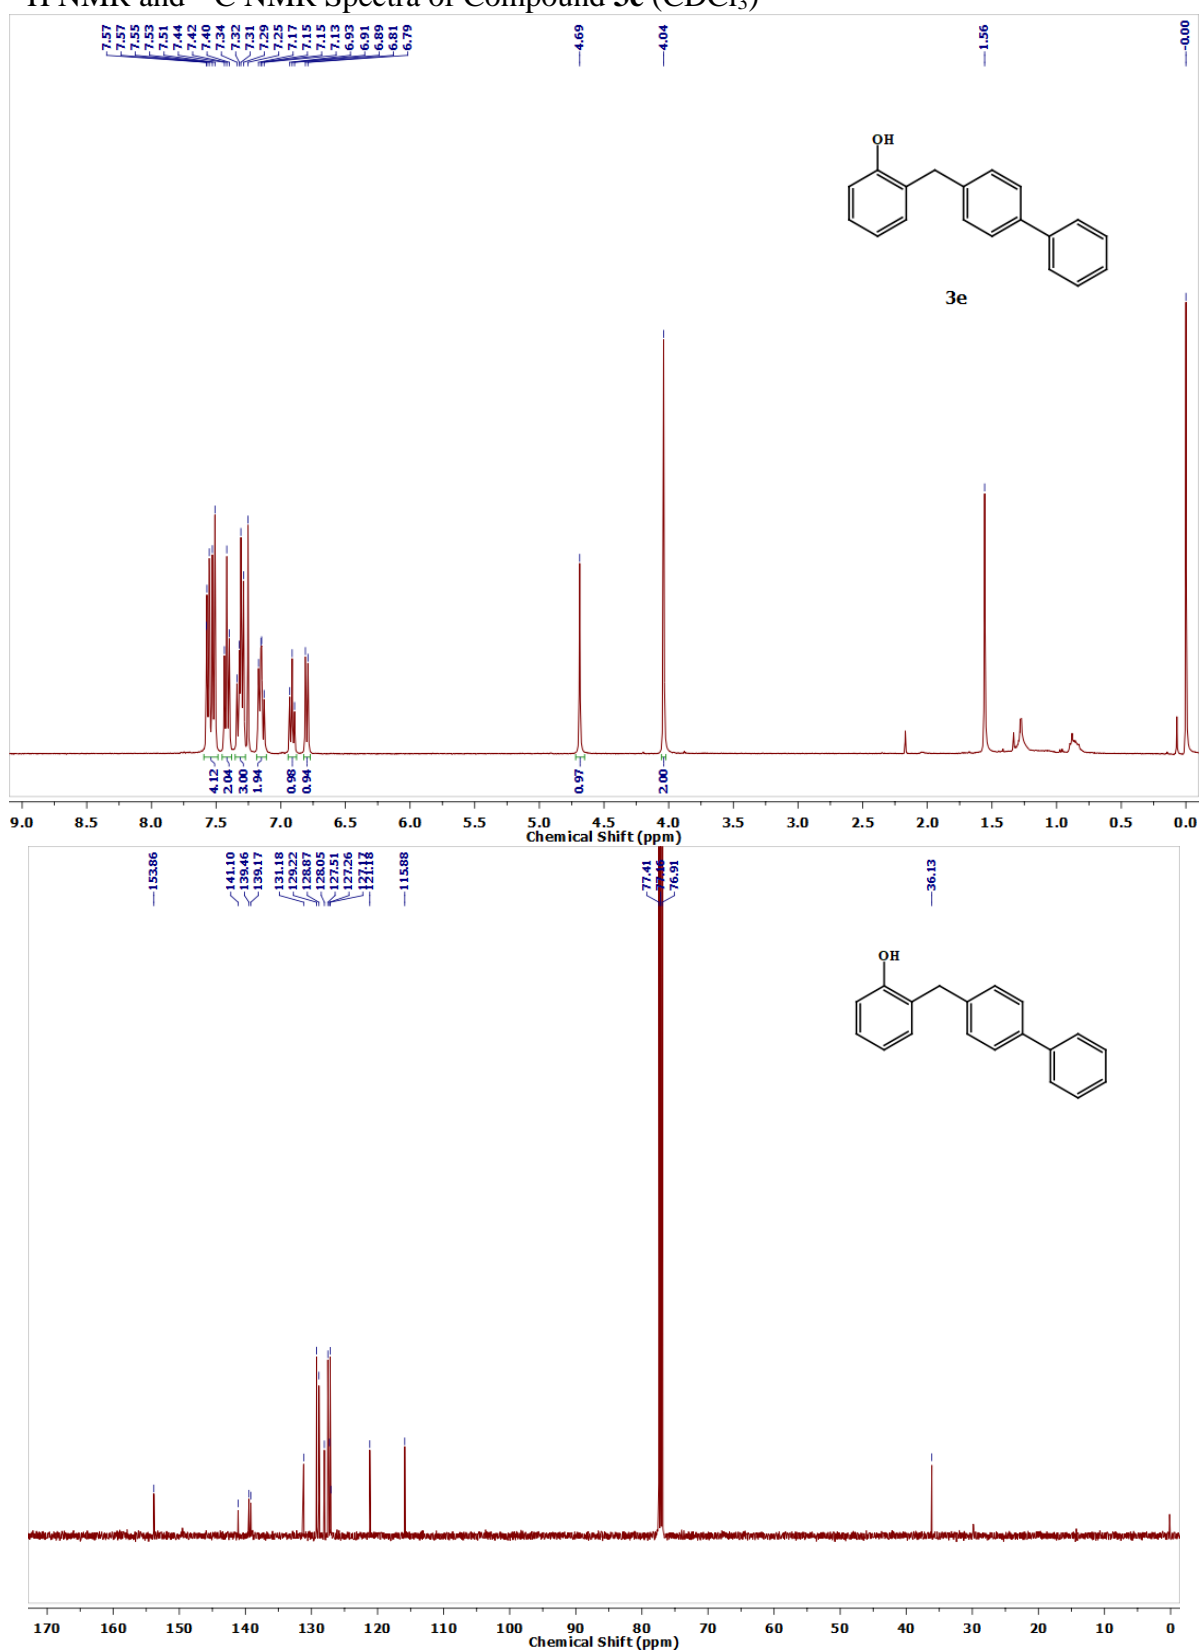



## Supporting Information

- $^1\text{H}$  NMR and  $^{13}\text{C}$  NMR Spectra of Compound **3f** ( $\text{CDCl}_3$ )

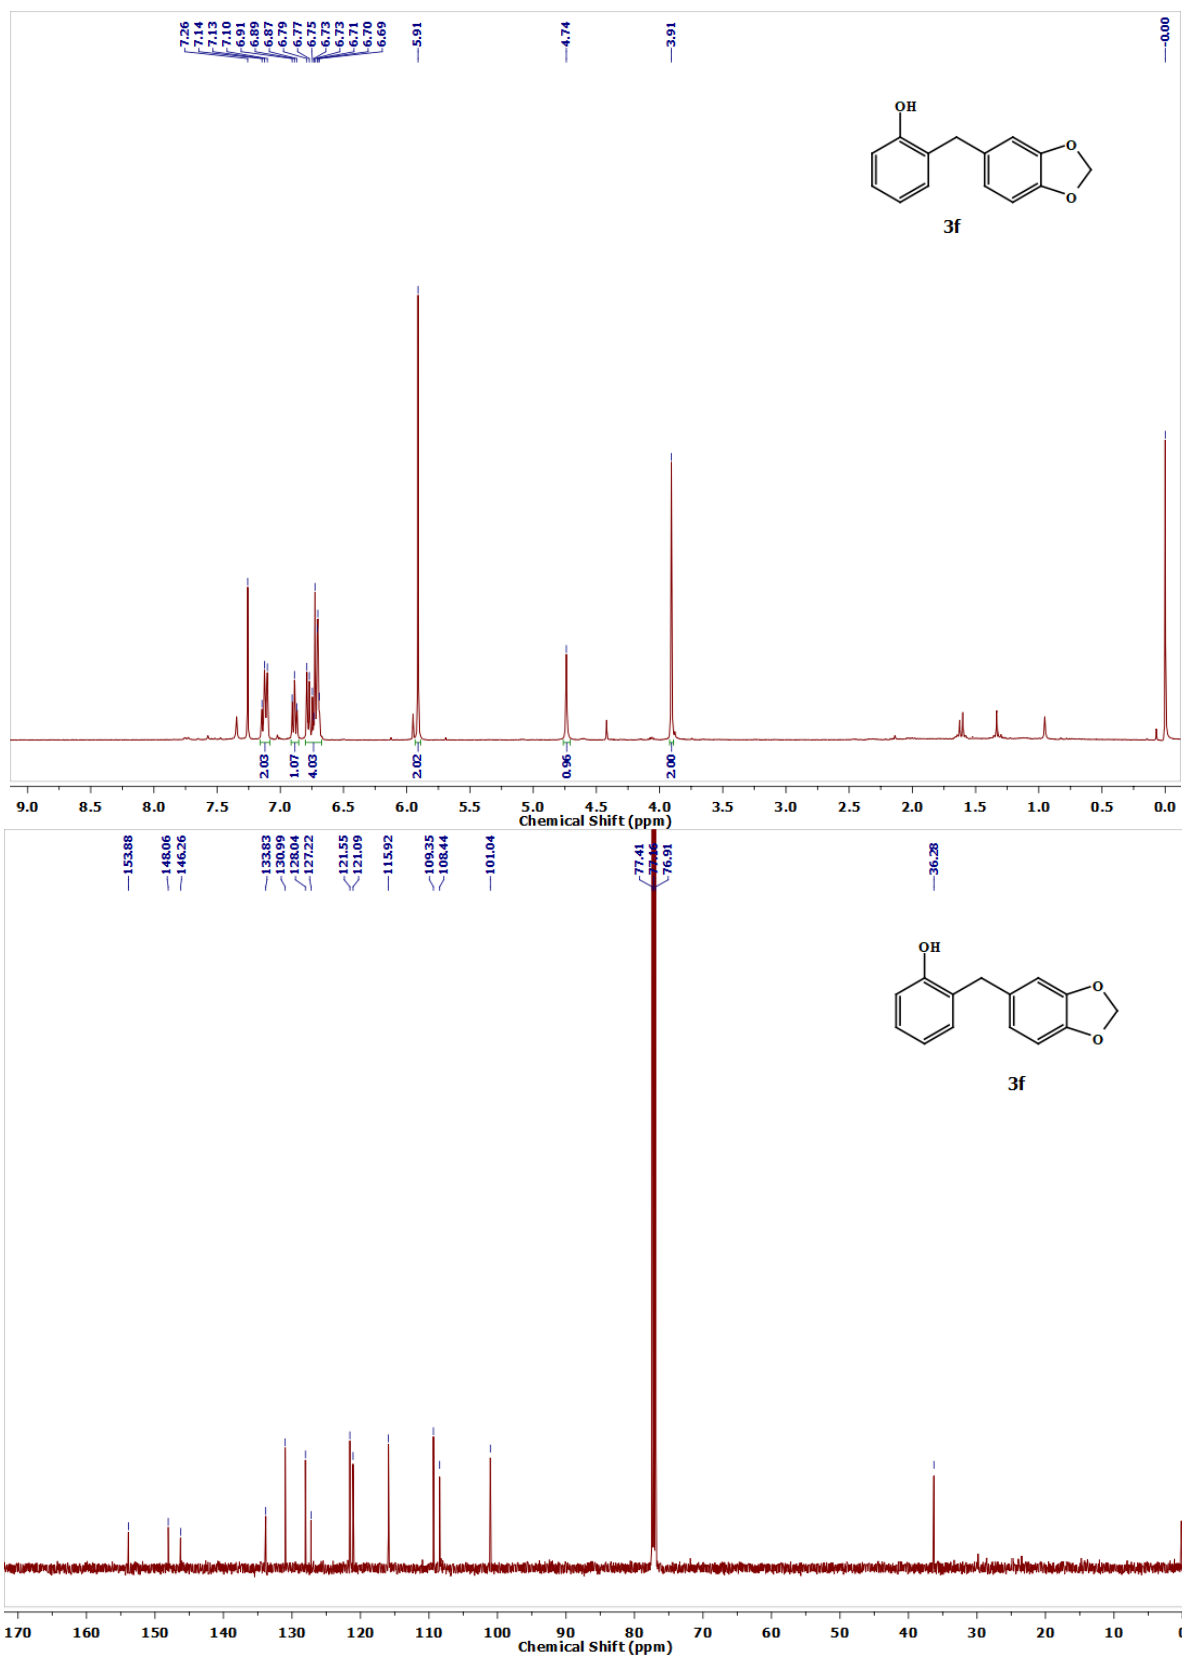

## Supporting Information

- $^1\text{H}$  NMR and  $^{13}\text{C}$  NMR Spectra of Compound **3g** ( $\text{CDCl}_3$ )

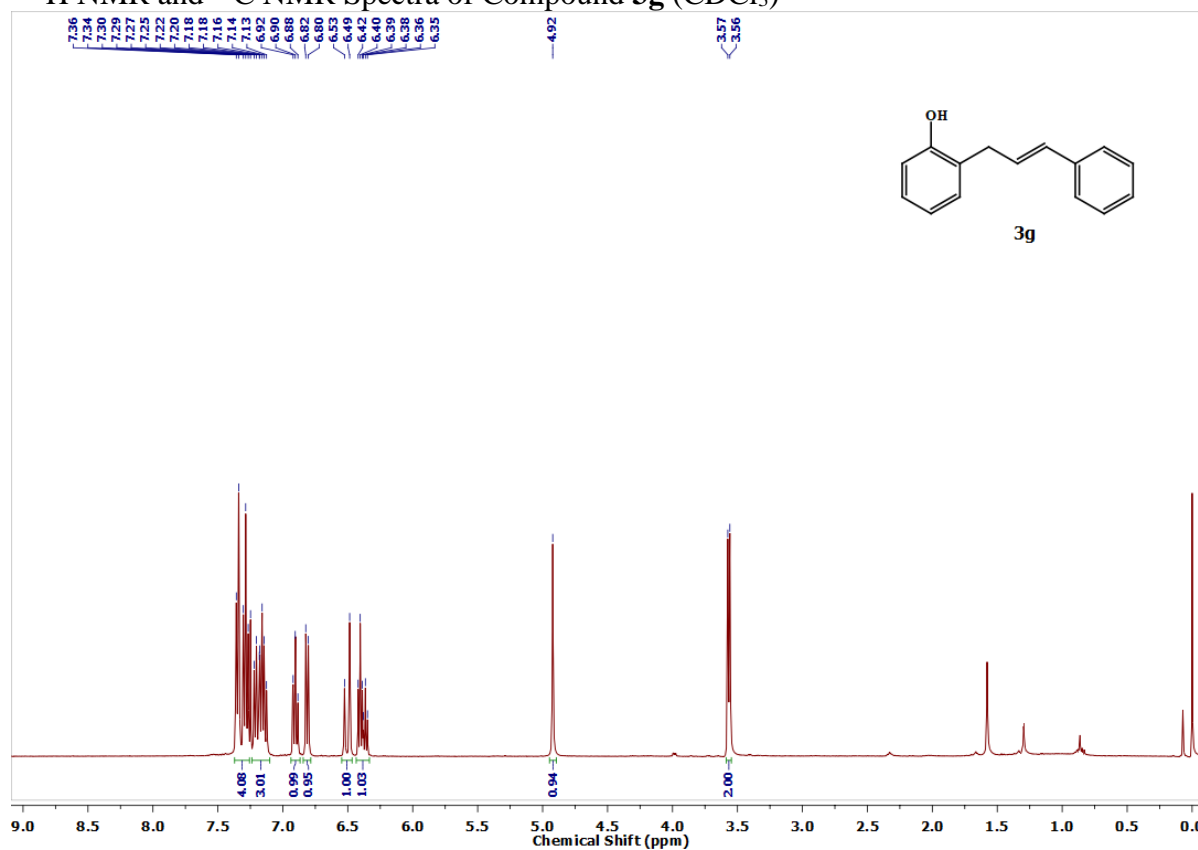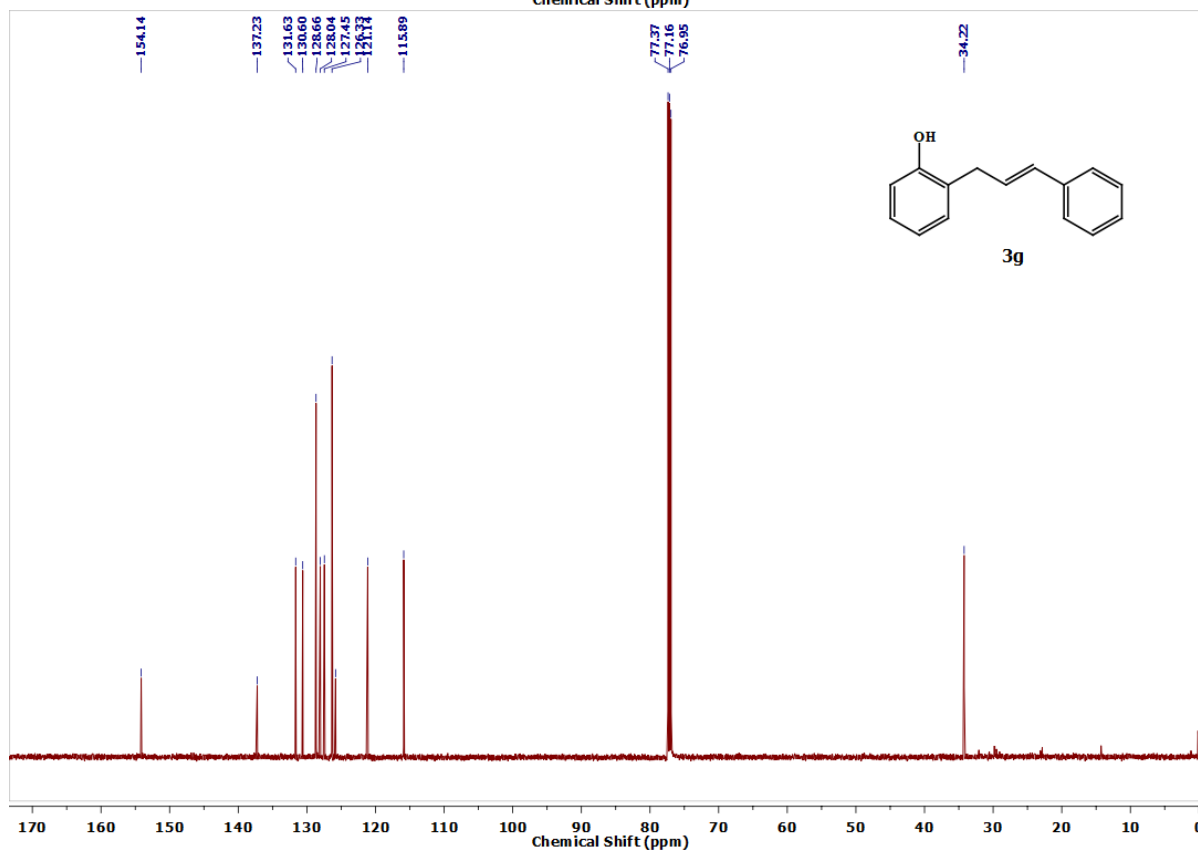

## Supporting Information

- $^1\text{H}$  NMR and  $^{13}\text{C}$  NMR Spectra of Compound **3h** ( $\text{CDCl}_3$ )

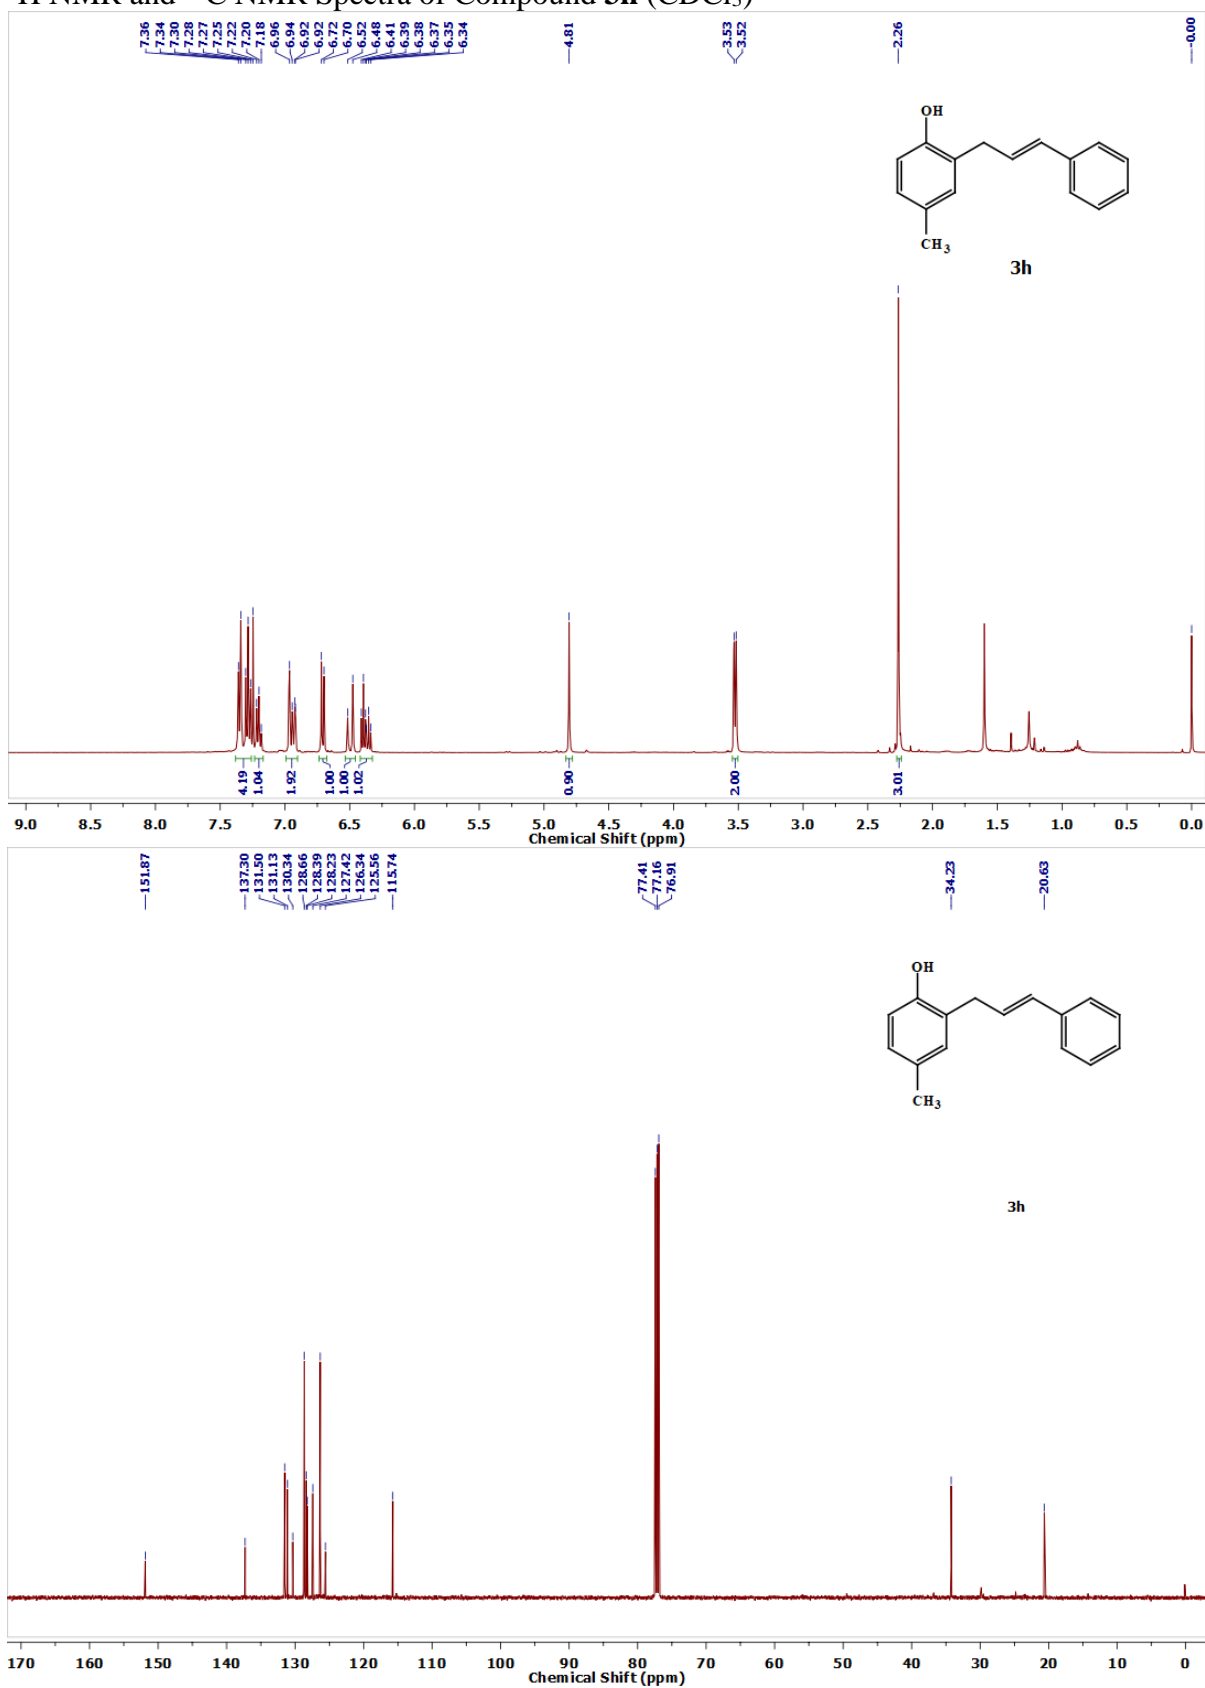

## Supporting Information

- $^1\text{H}$  NMR and  $^{13}\text{C}$  NMR Spectra of Compound **3i** ( $\text{CDCl}_3$ )

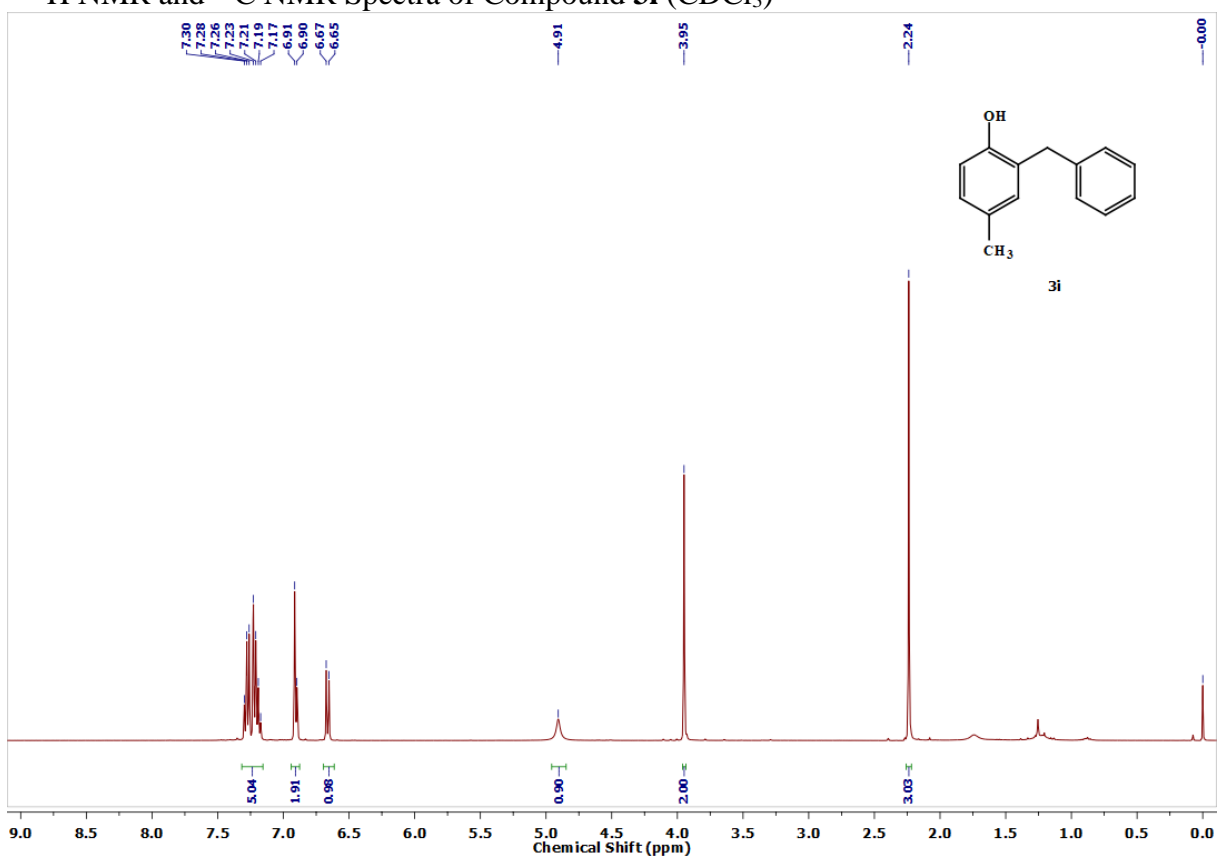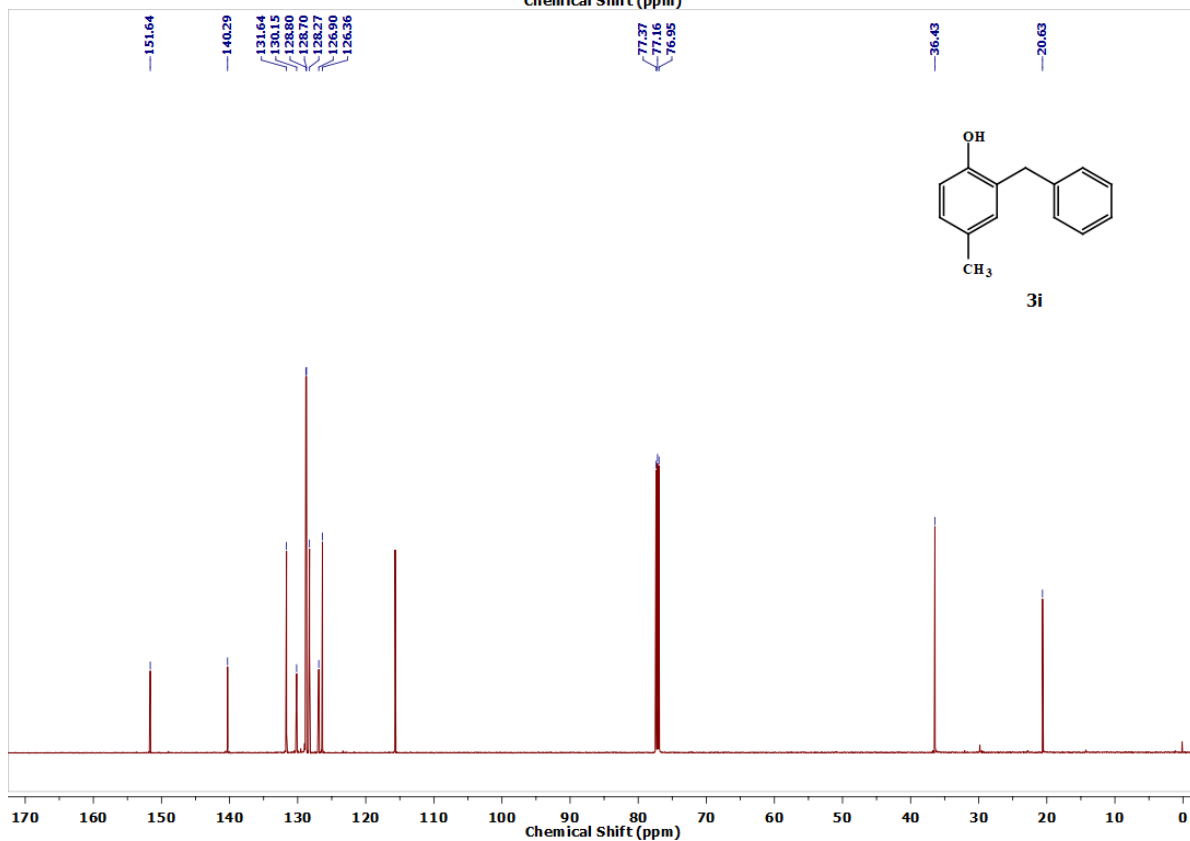

## Supporting Information

- $^1\text{H}$  NMR and  $^{13}\text{C}$  NMR Spectra of Compound **3j** ( $\text{CDCl}_3$ )

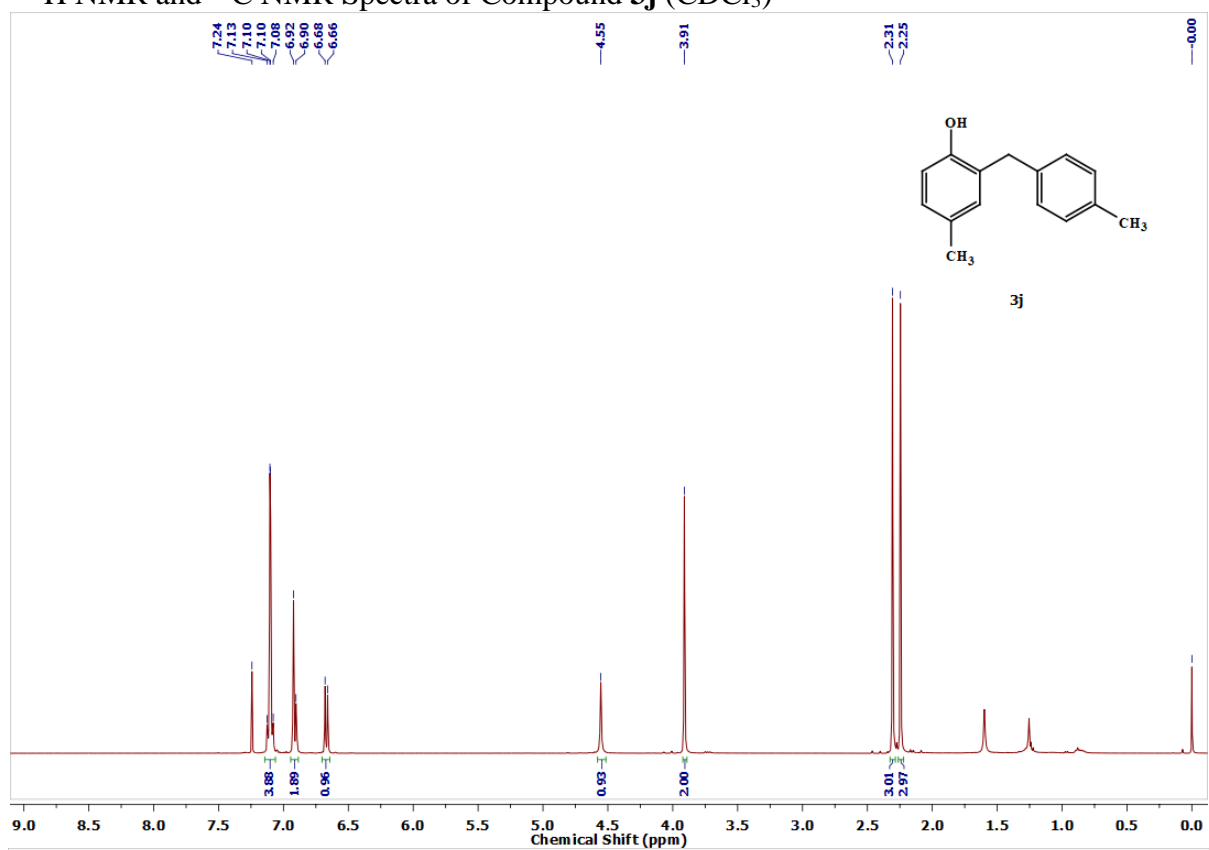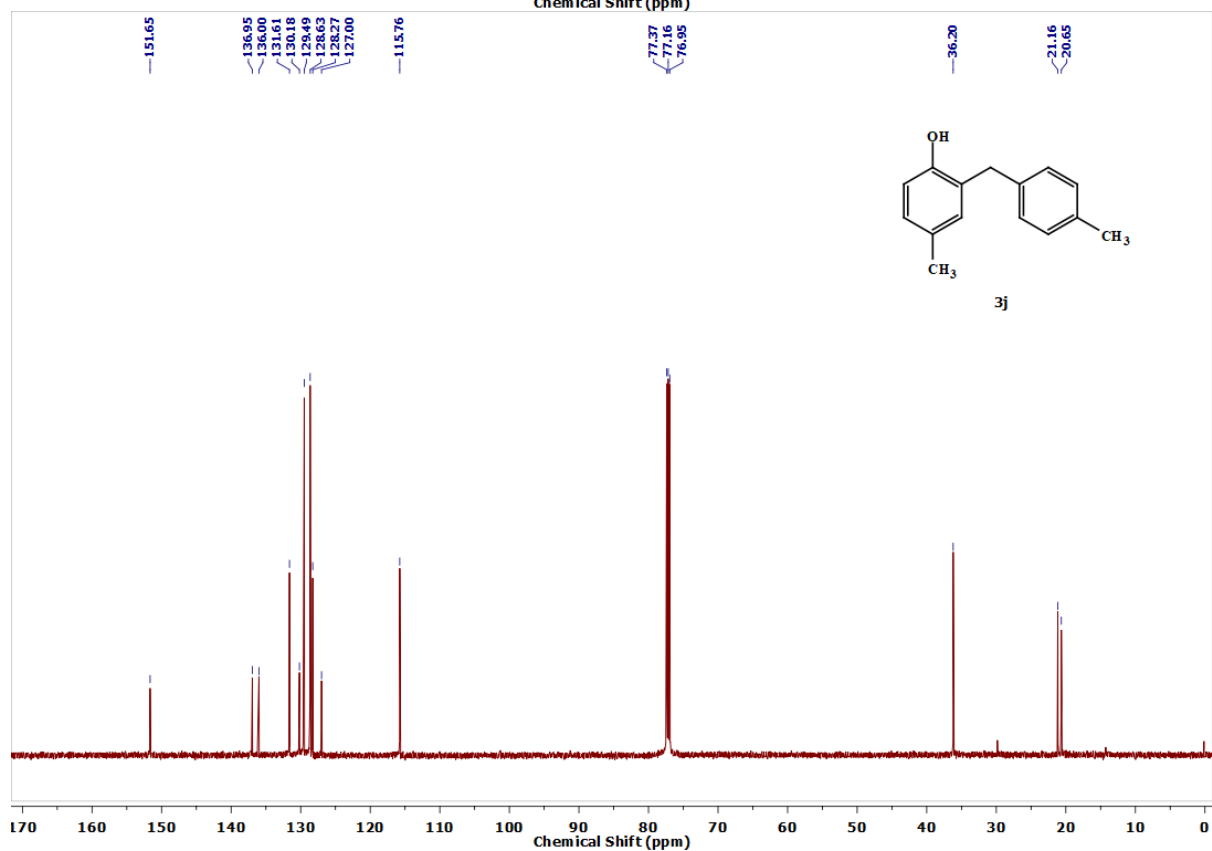

## Supporting Information

- $^1\text{H}$  NMR and  $^{13}\text{C}$  NMR Spectra of Compound **3k** ( $\text{CDCl}_3$ )

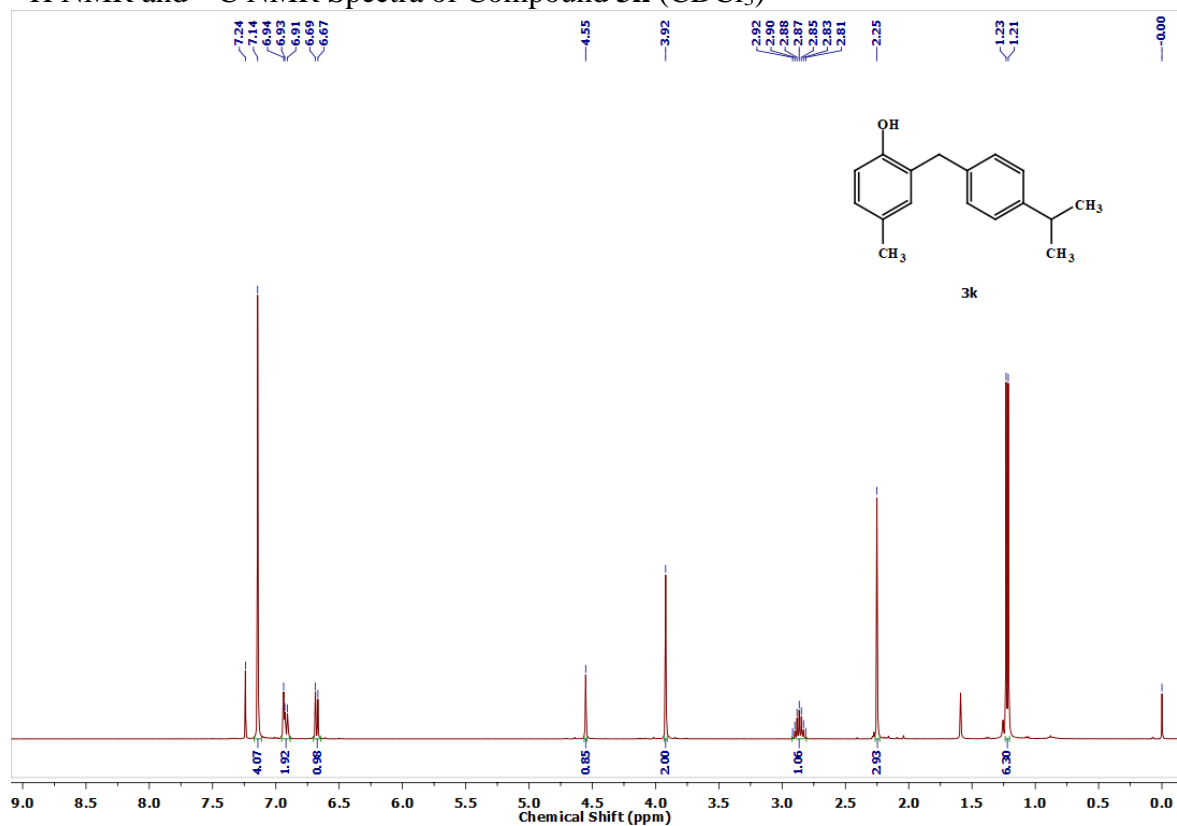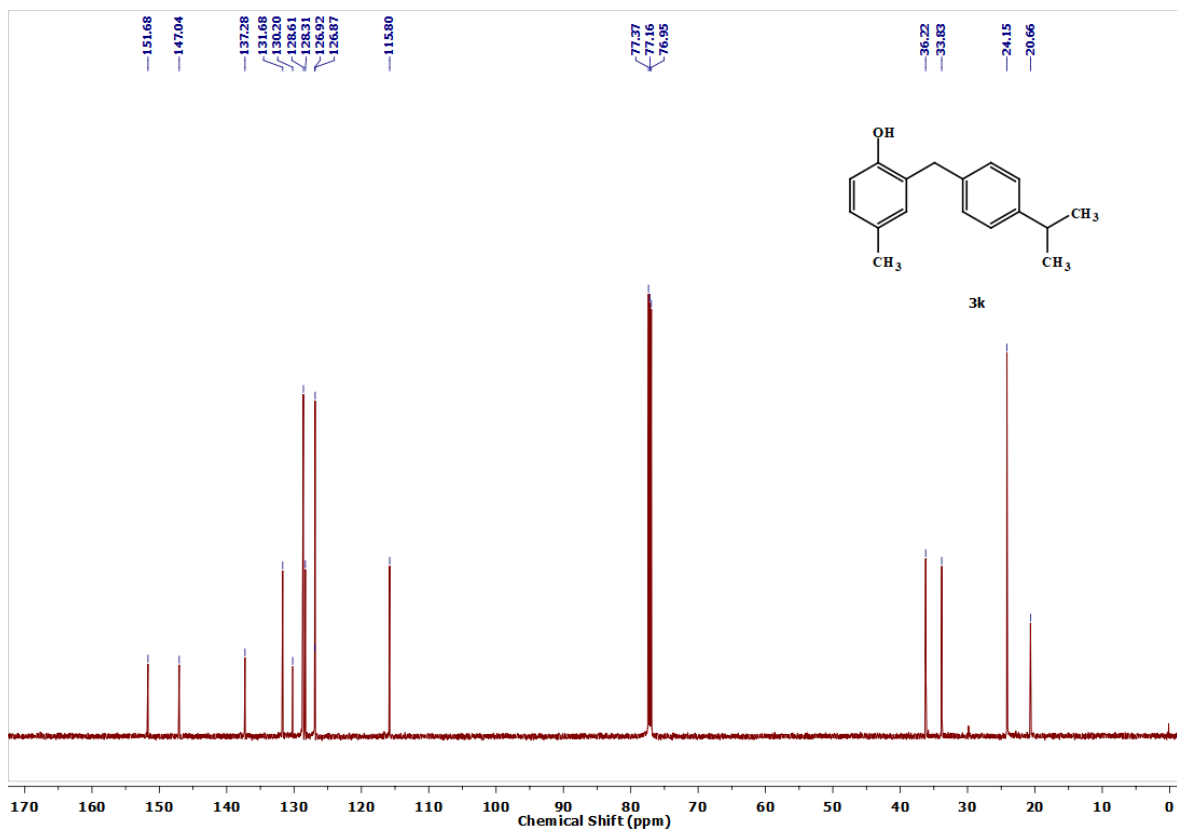

## Supporting Information

- $^1\text{H}$  NMR and  $^{13}\text{C}$  NMR Spectra of Compound **31** ( $\text{CDCl}_3$ )

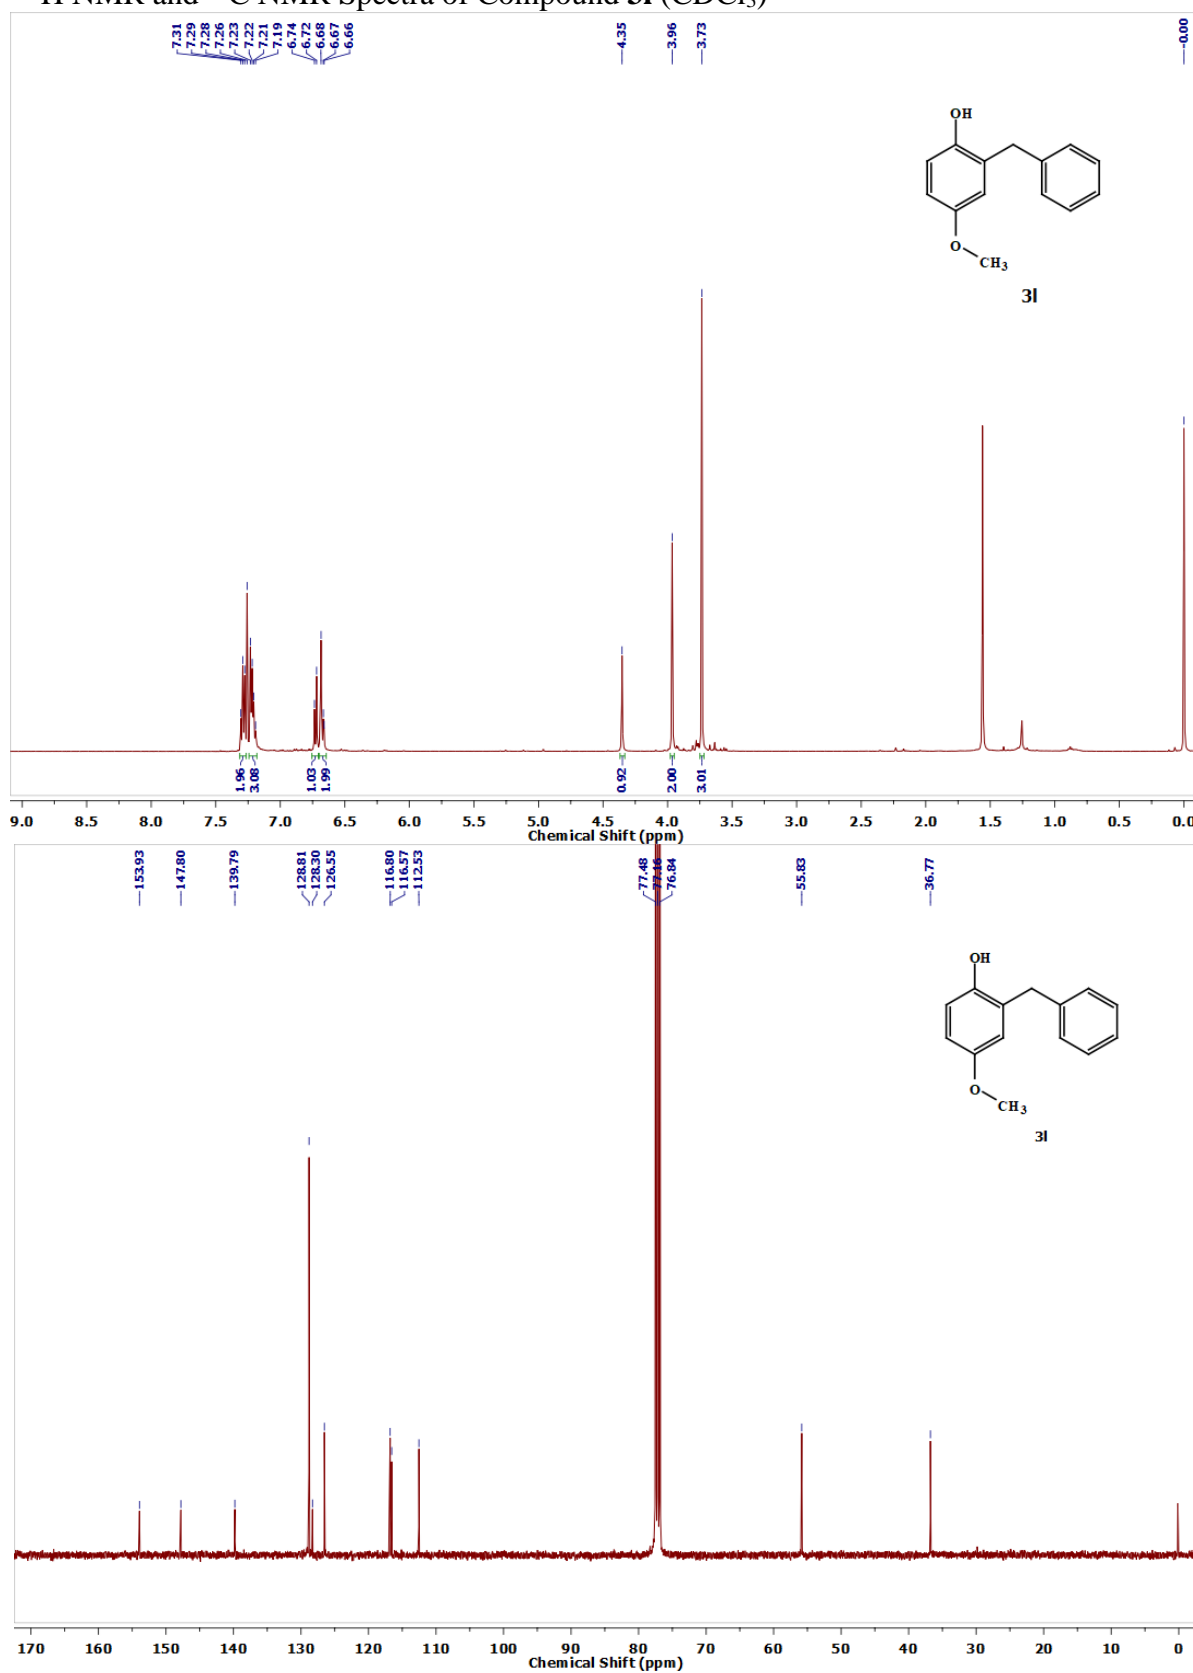

## Supporting Information

- $^1\text{H}$  NMR and  $^{13}\text{C}$  NMR Spectra of Compound **3m** ( $\text{CDCl}_3$ )

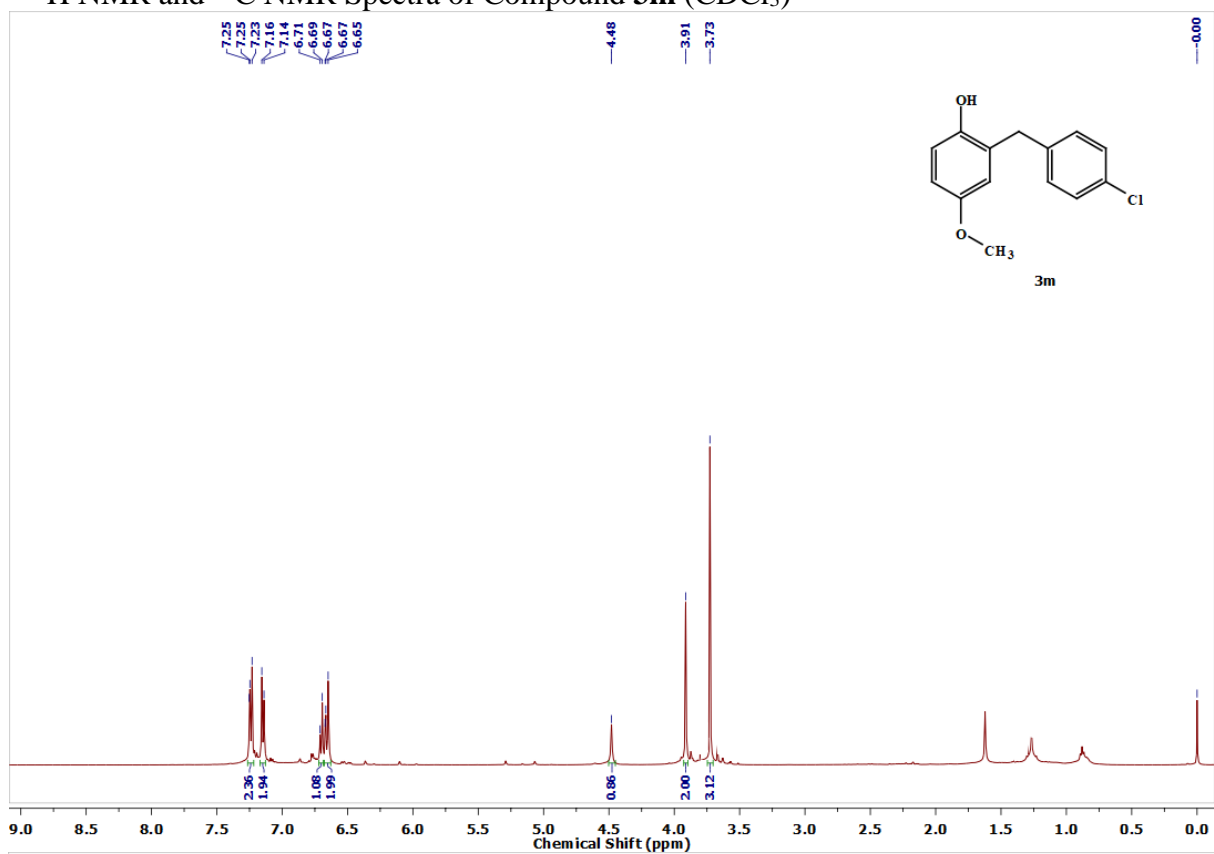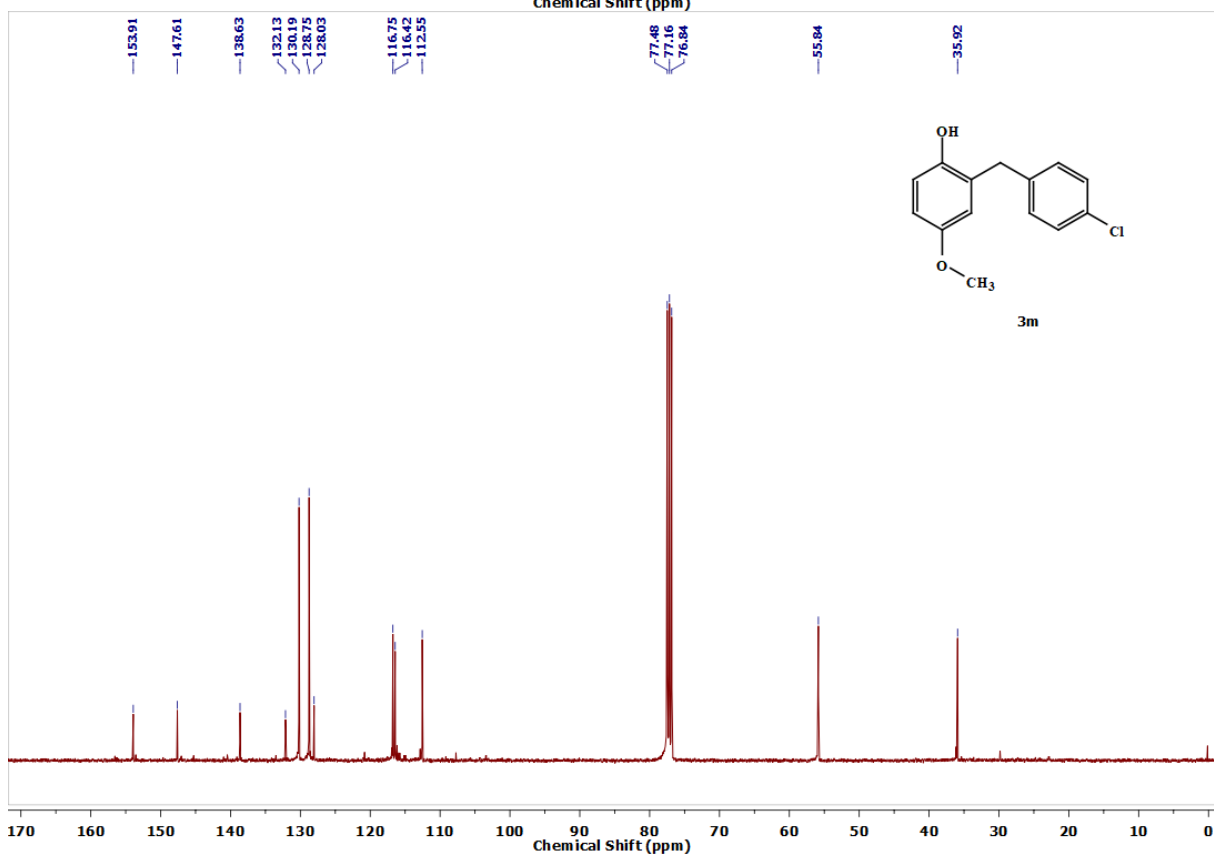



## Supporting Information

- $^1\text{H}$  NMR and  $^{13}\text{C}$  NMR Spectra of Compound **3n** ( $\text{CDCl}_3$ )

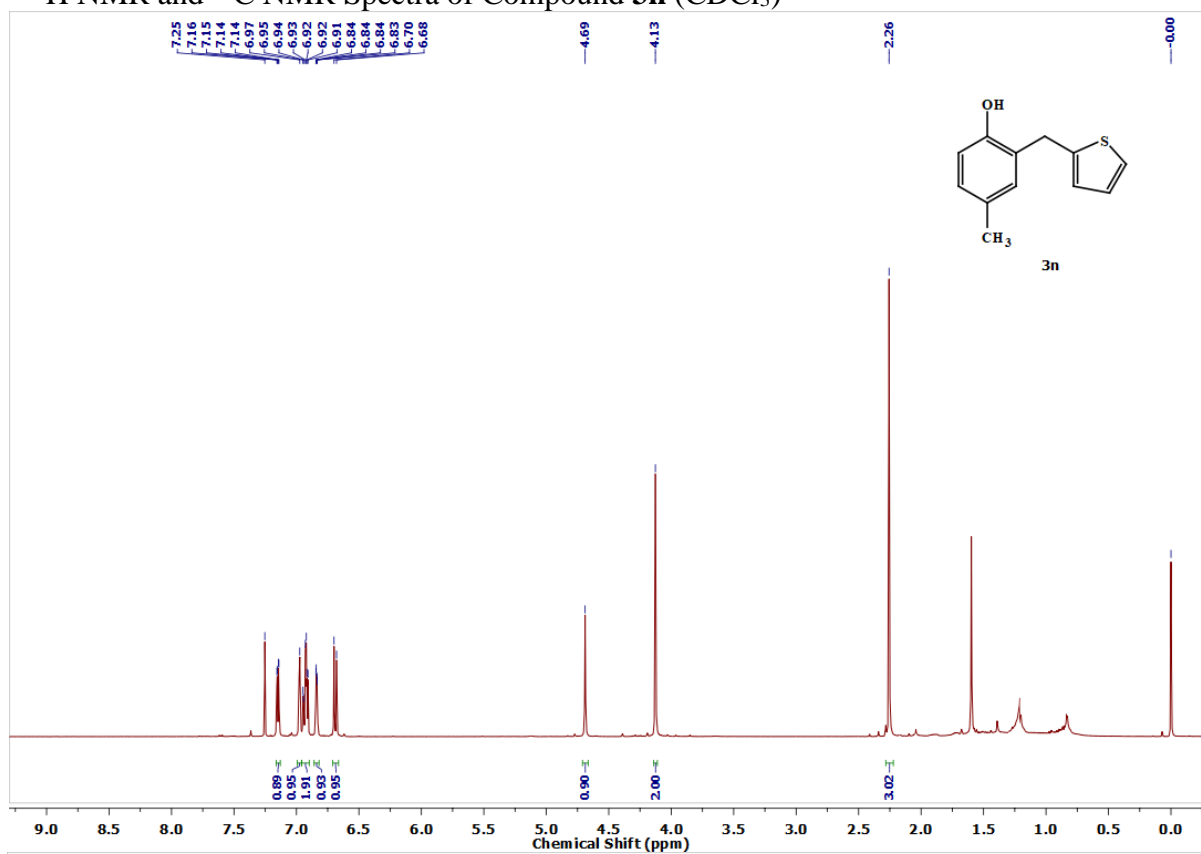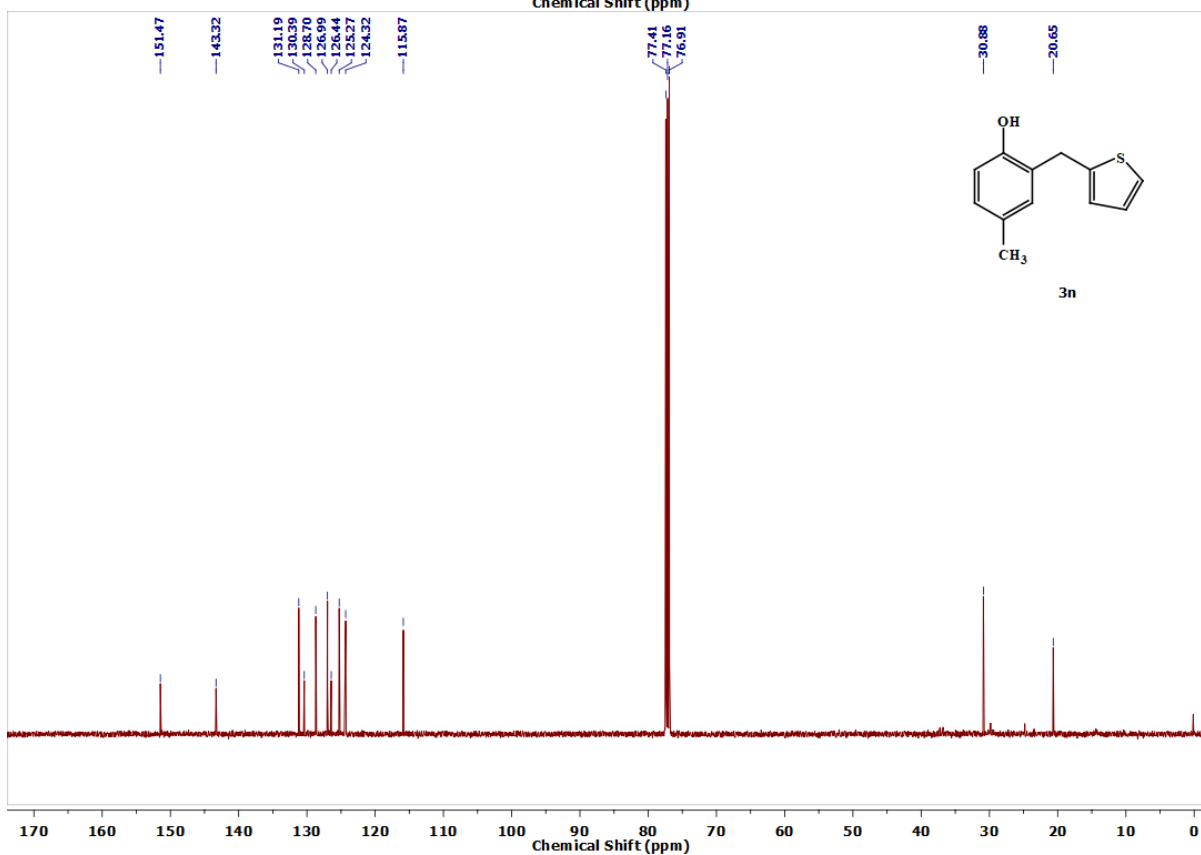

## Supporting Information

- $^1\text{H}$  NMR and  $^{13}\text{C}$  NMR Spectra of Compound **3o** ( $\text{CDCl}_3$ )

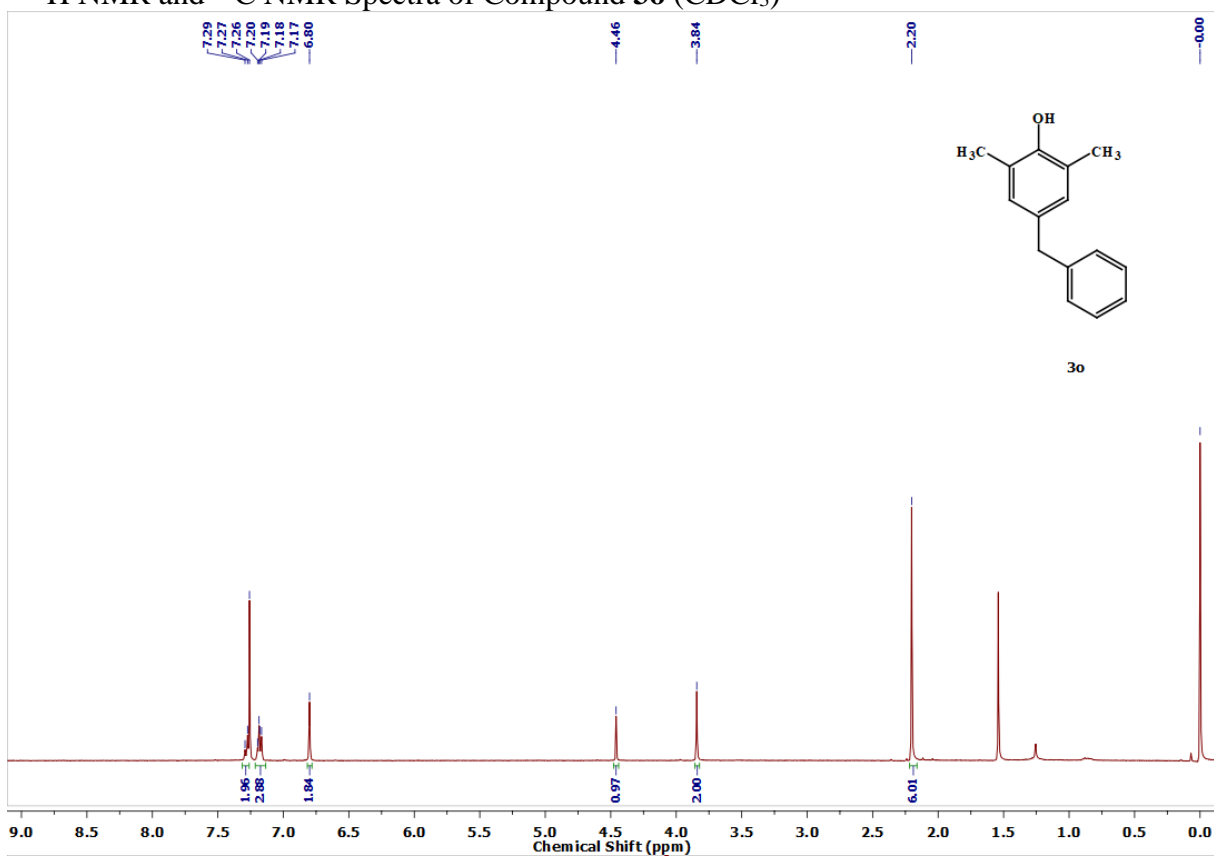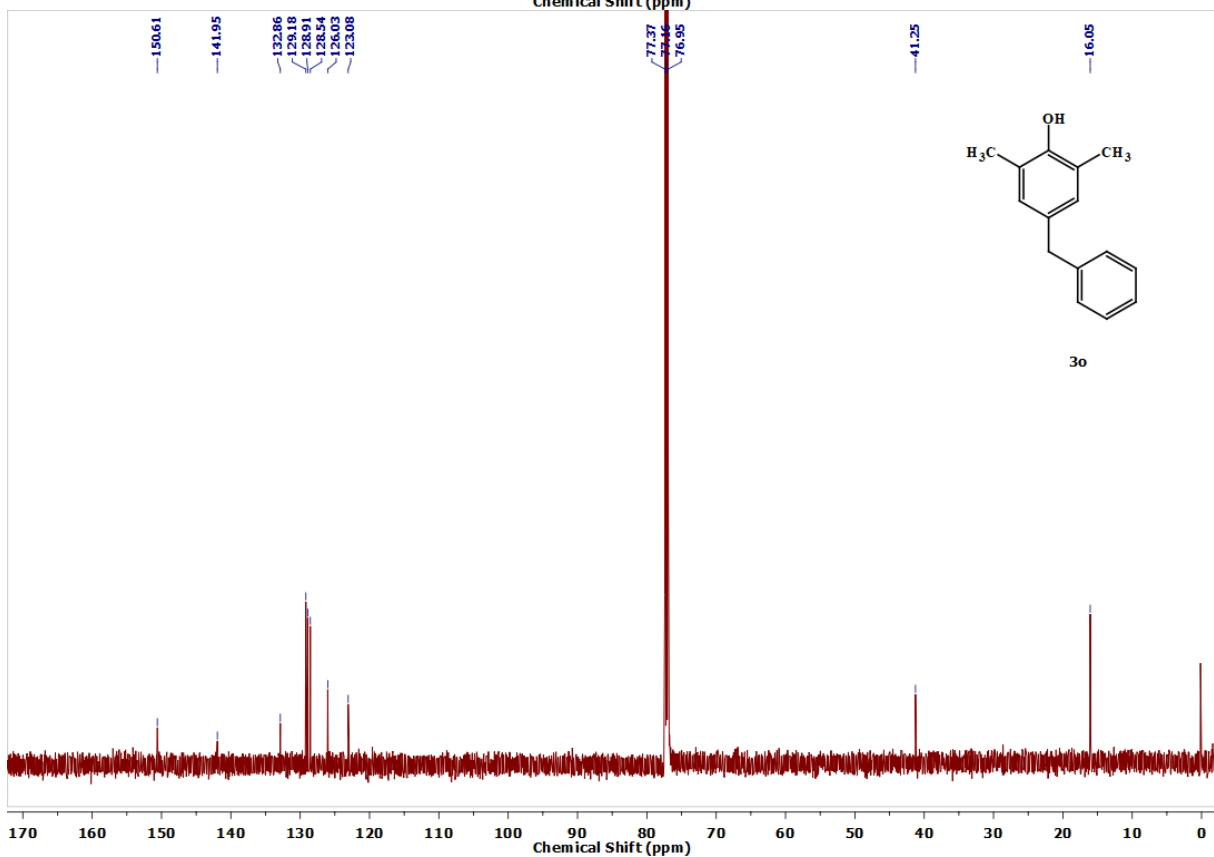

## Supporting Information

### NMR Spectra of the products, Compound 5a-5h

#### ❖ $^1\text{H}$ NMR and $^{13}\text{C}$ NMR Spectra of Compound 5a ( $\text{CDCl}_3$ )

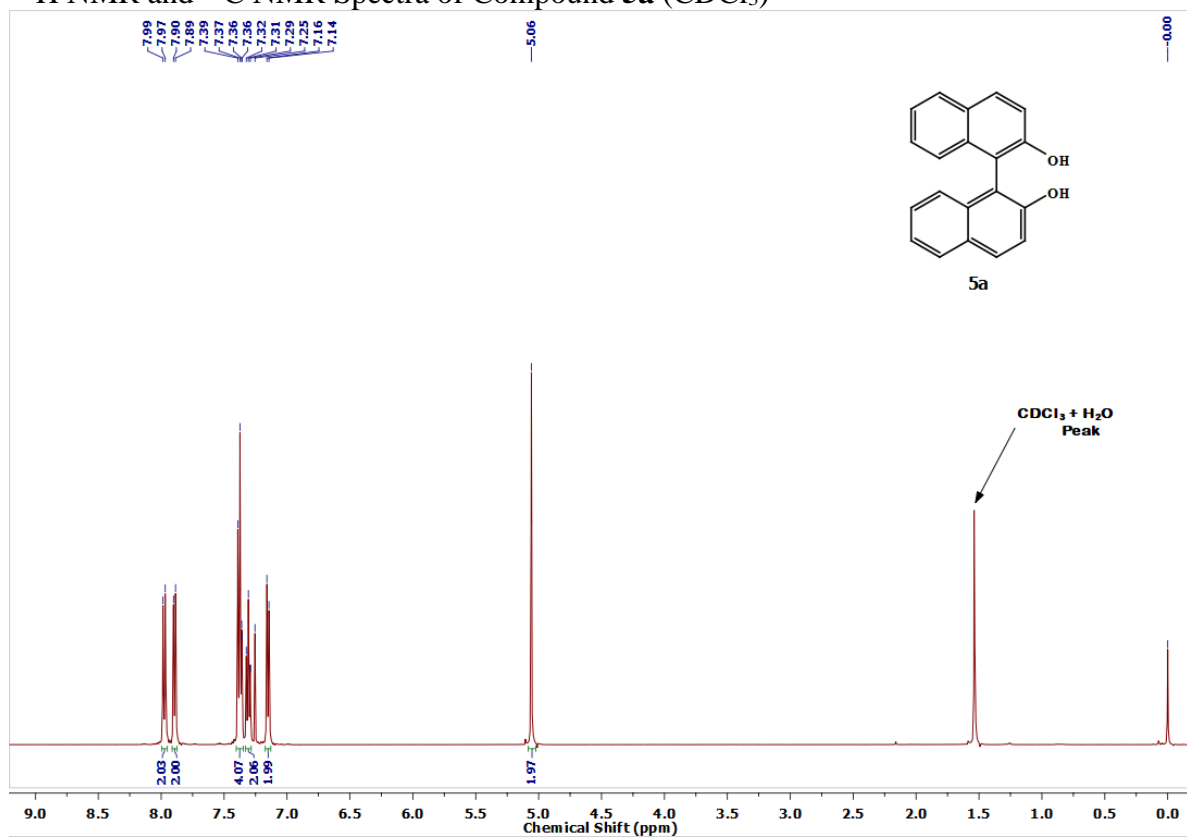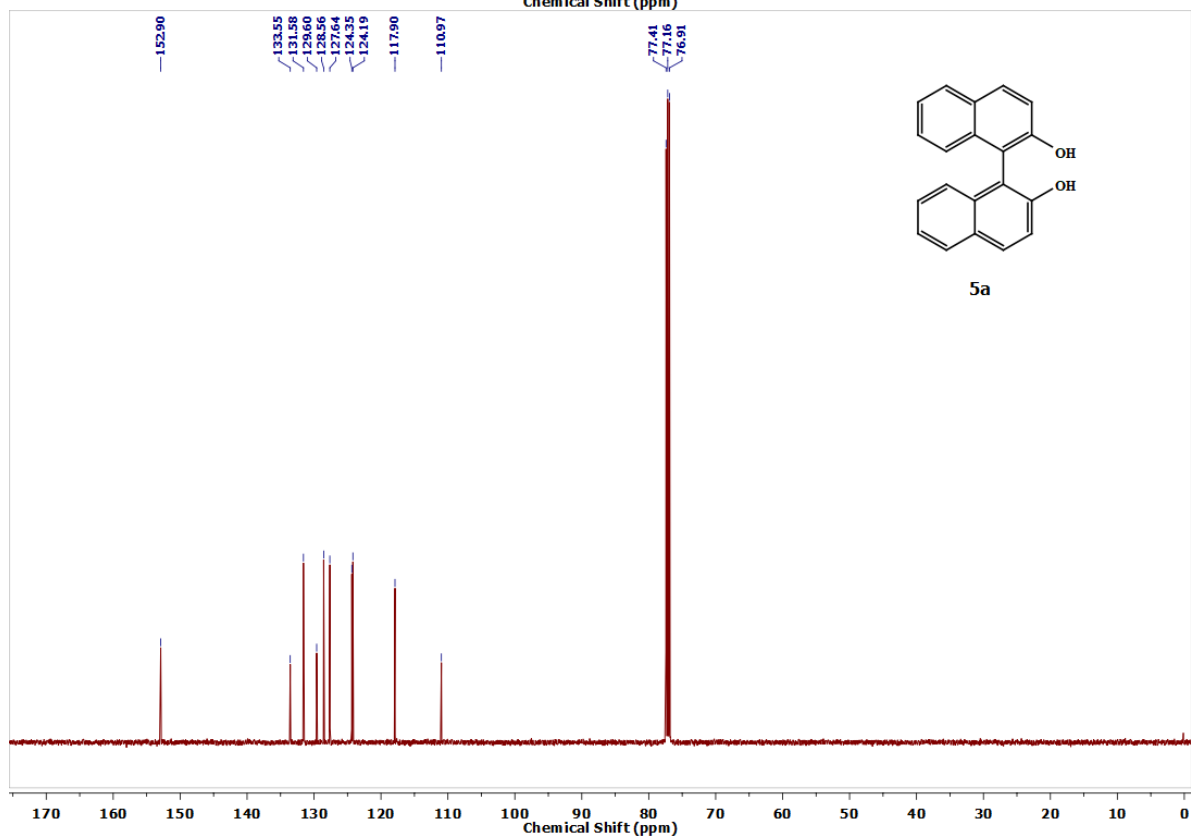

## Supporting Information

- $^1\text{H}$  NMR and  $^{13}\text{C}$  NMR Spectra of Compound **5b** (Methanol- $d_4$ )

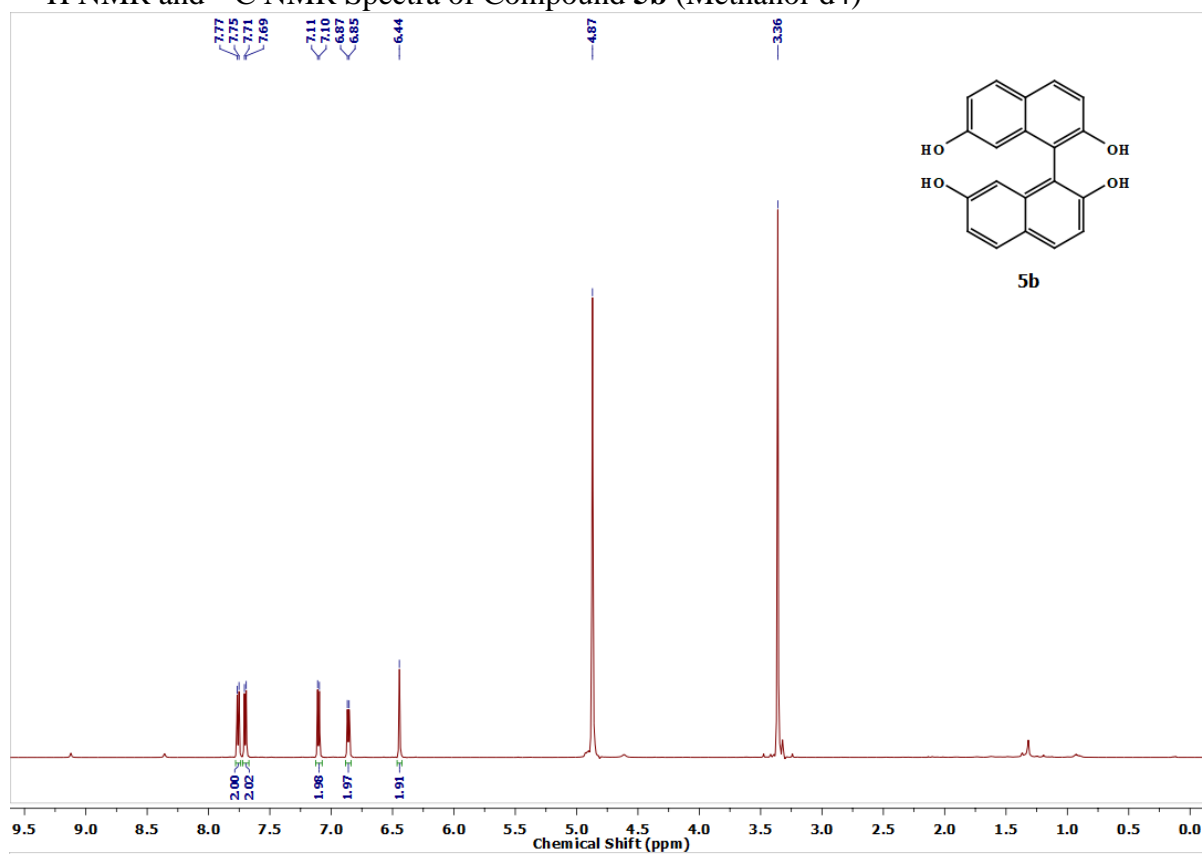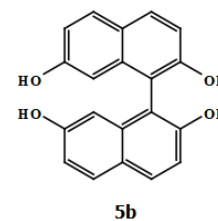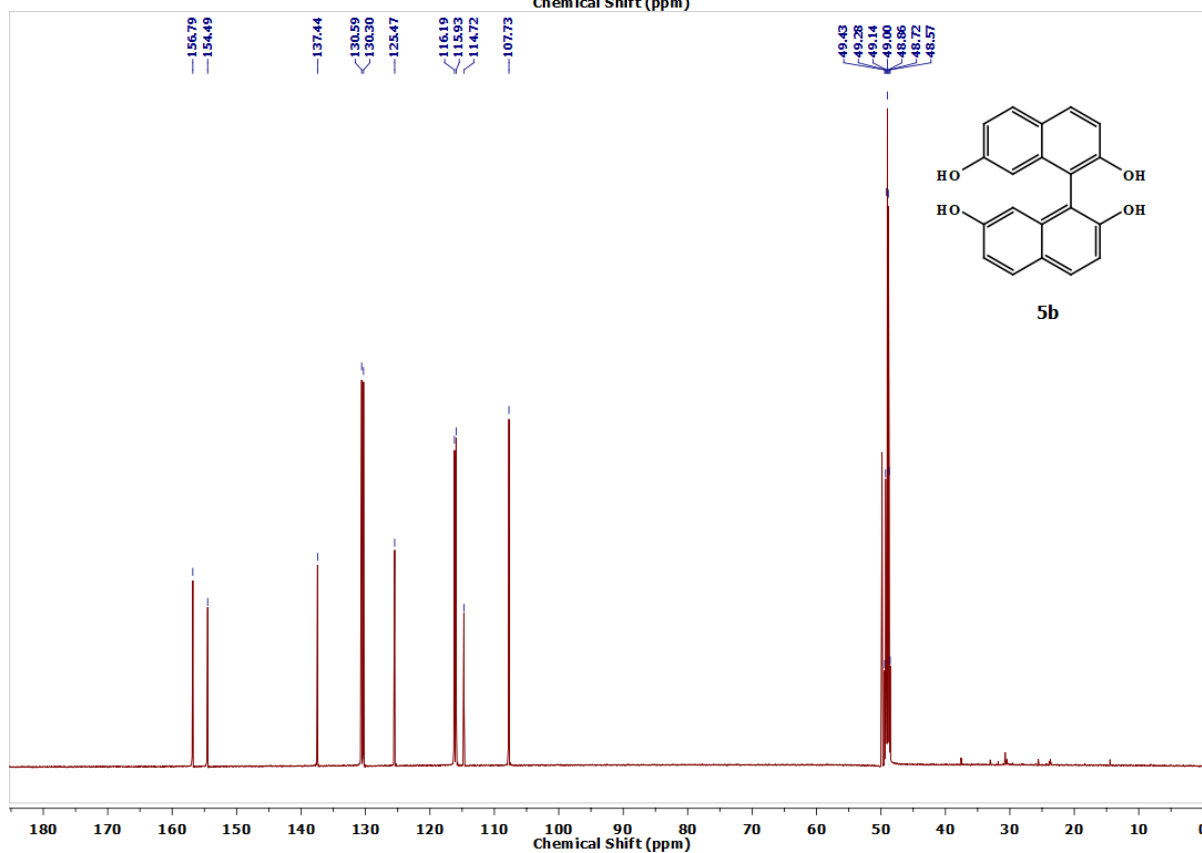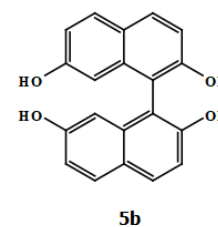

## Supporting Information

- $^1\text{H}$  NMR and  $^{13}\text{C}$  NMR Spectra of Compound **5c** ( $\text{CDCl}_3$ )

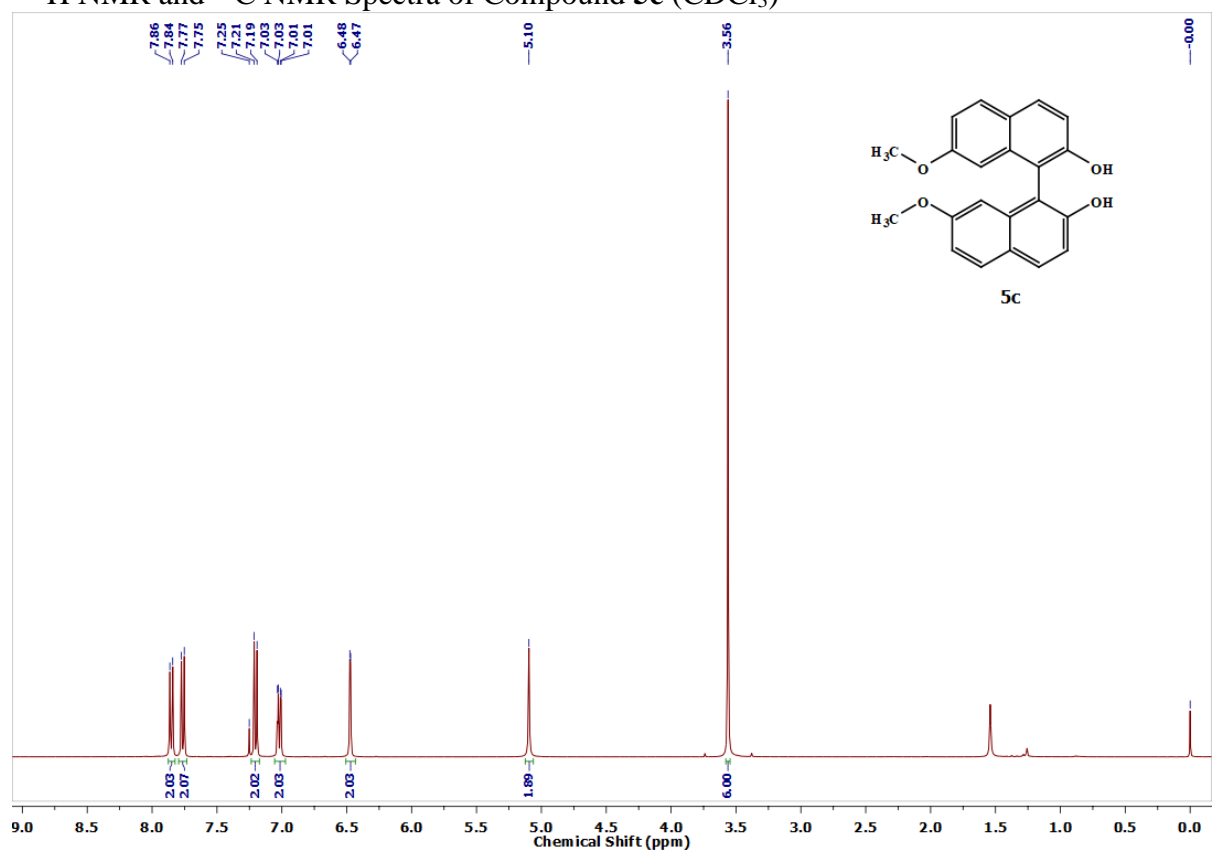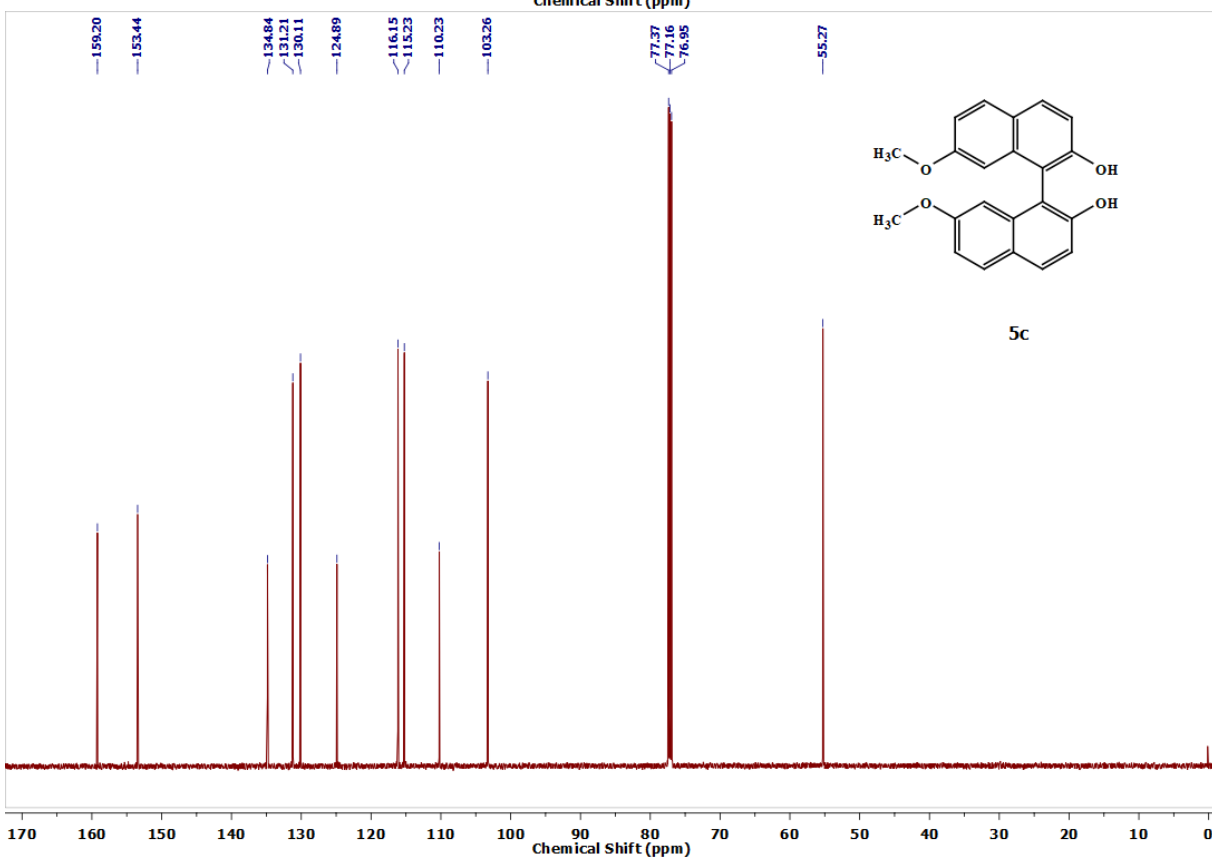

## Supporting Information

- $^1\text{H}$  NMR and  $^{13}\text{C}$  NMR Spectra of Compound **5d** (Methanol- $d_4$ )

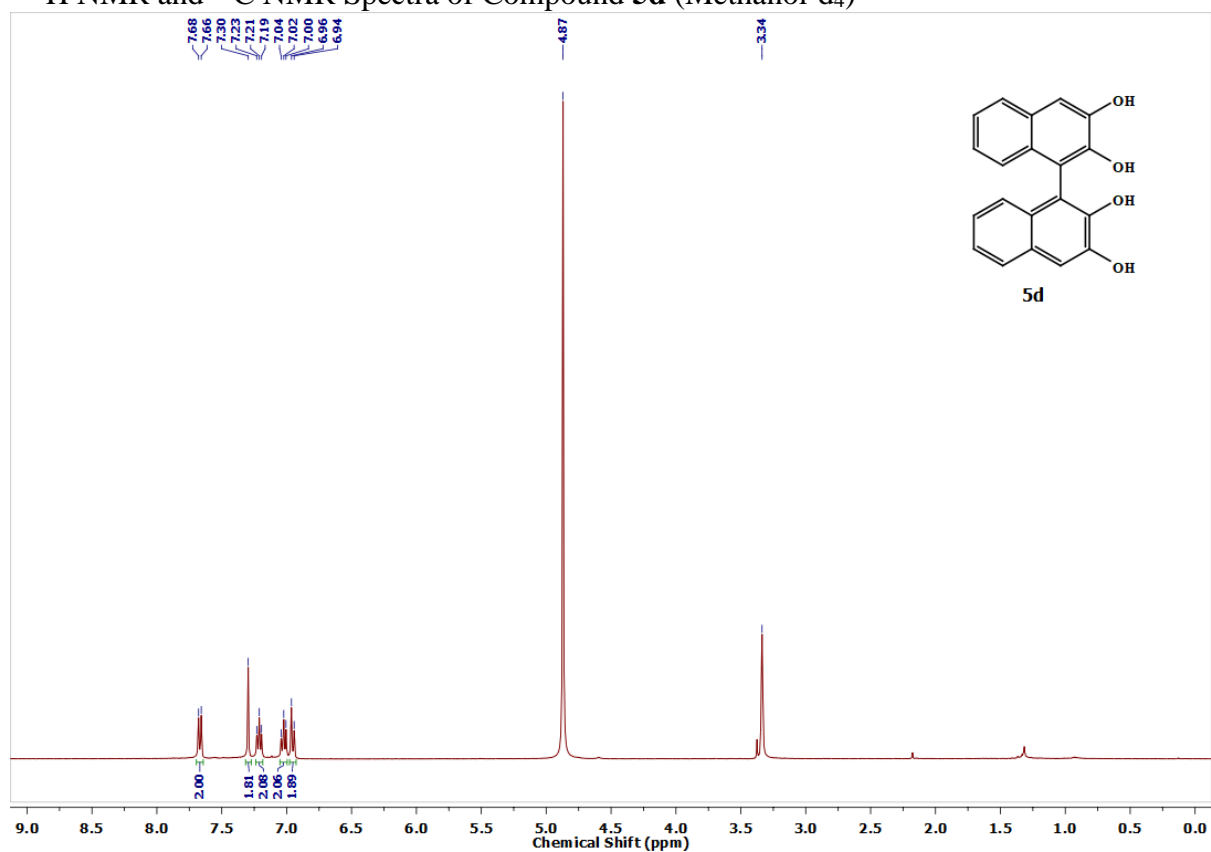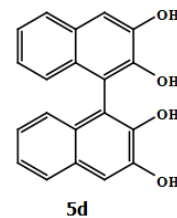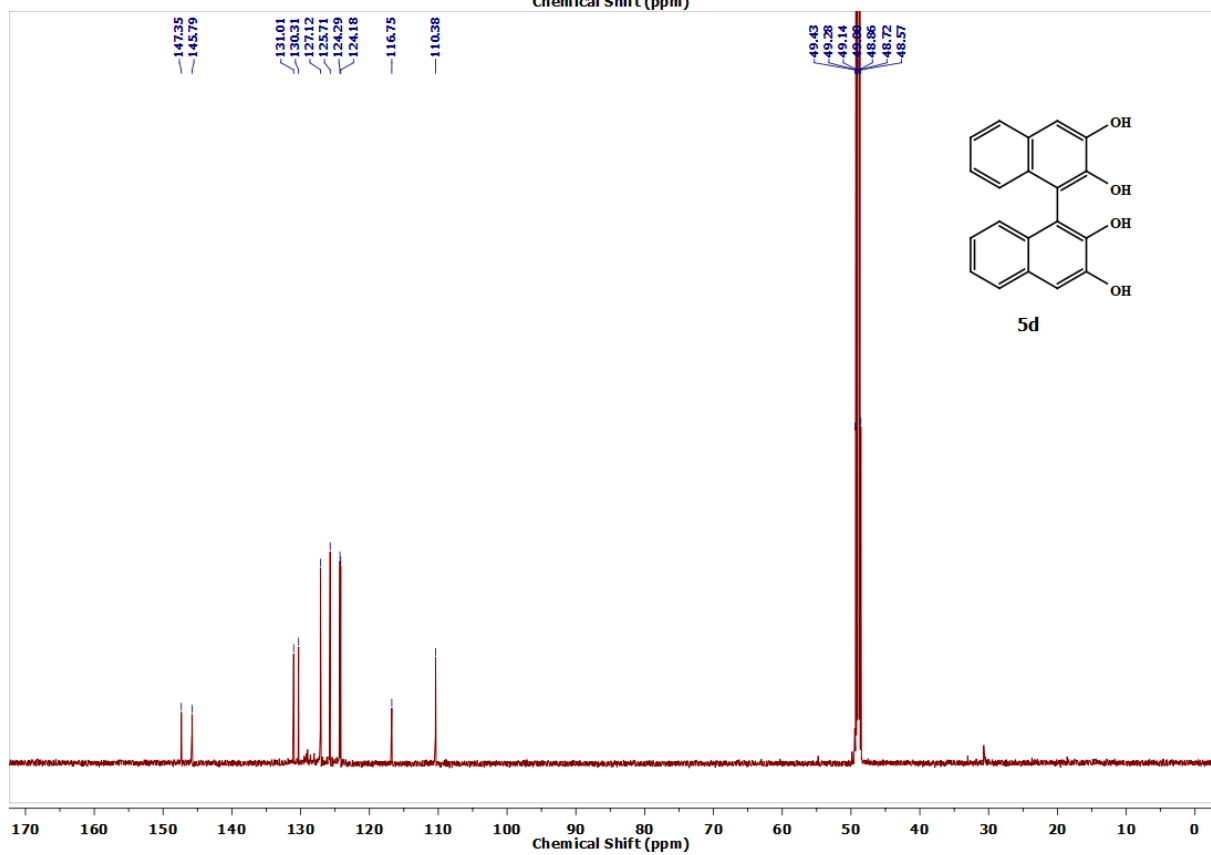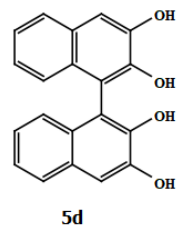

## Supporting Information

- $^1\text{H}$  NMR and  $^{13}\text{C}$  NMR Spectra of Compound **5e** ( $\text{DMSO-d}_6$ )

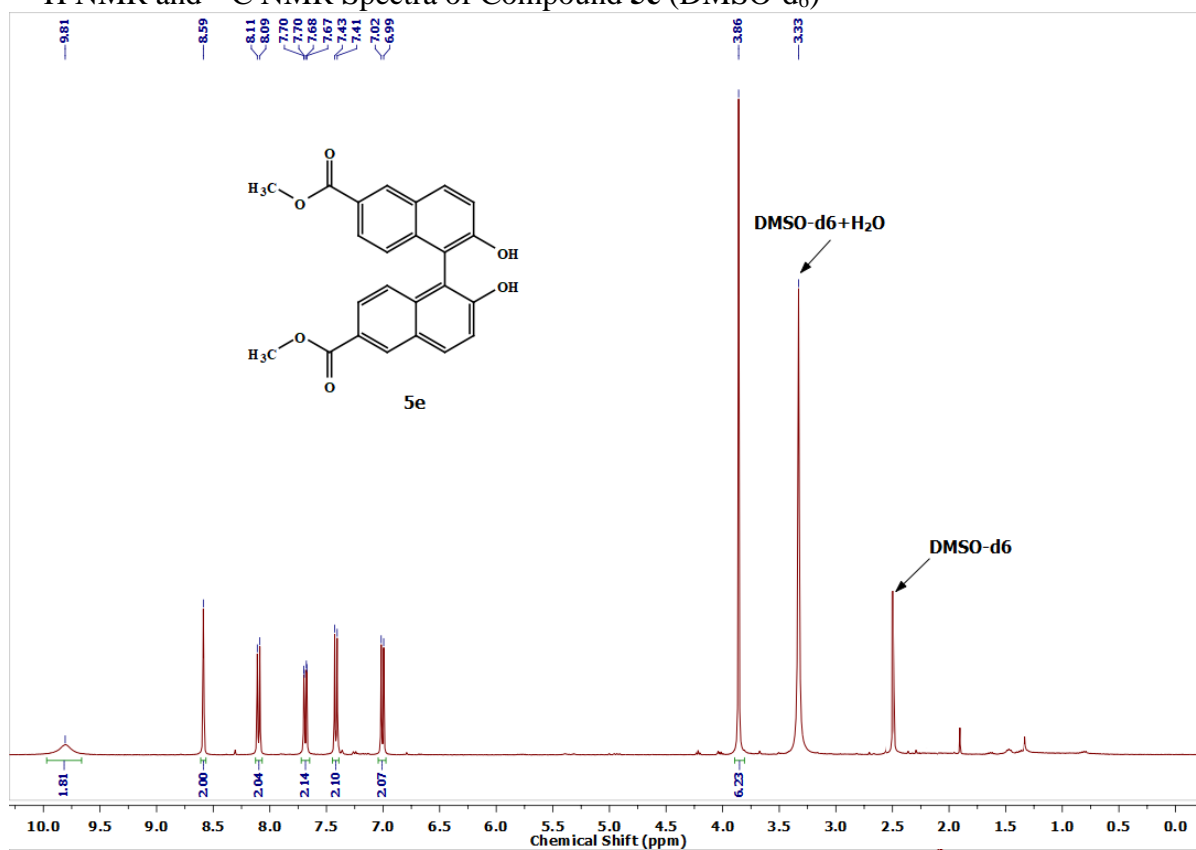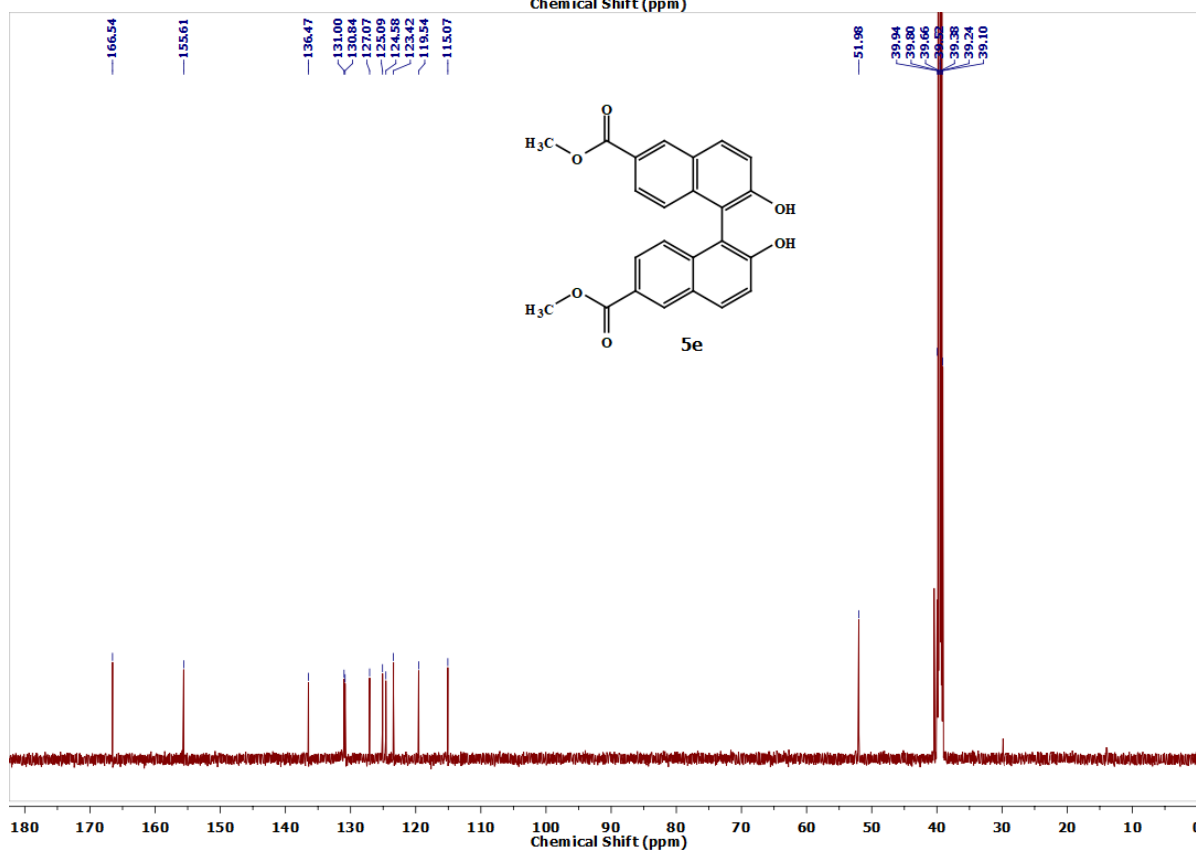

## Supporting Information

- $^1\text{H}$  NMR and  $^{13}\text{C}$  NMR Spectra of Compound **5f** ( $\text{CDCl}_3$ )

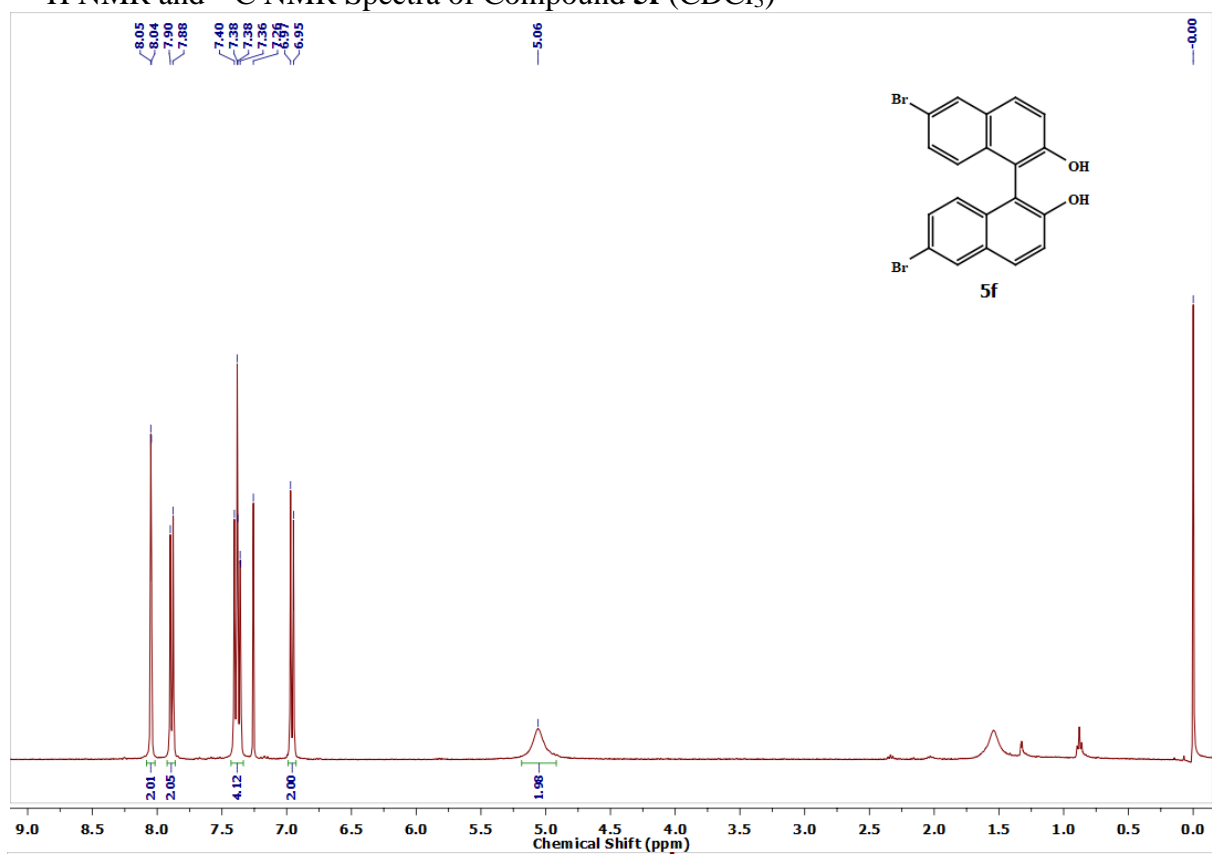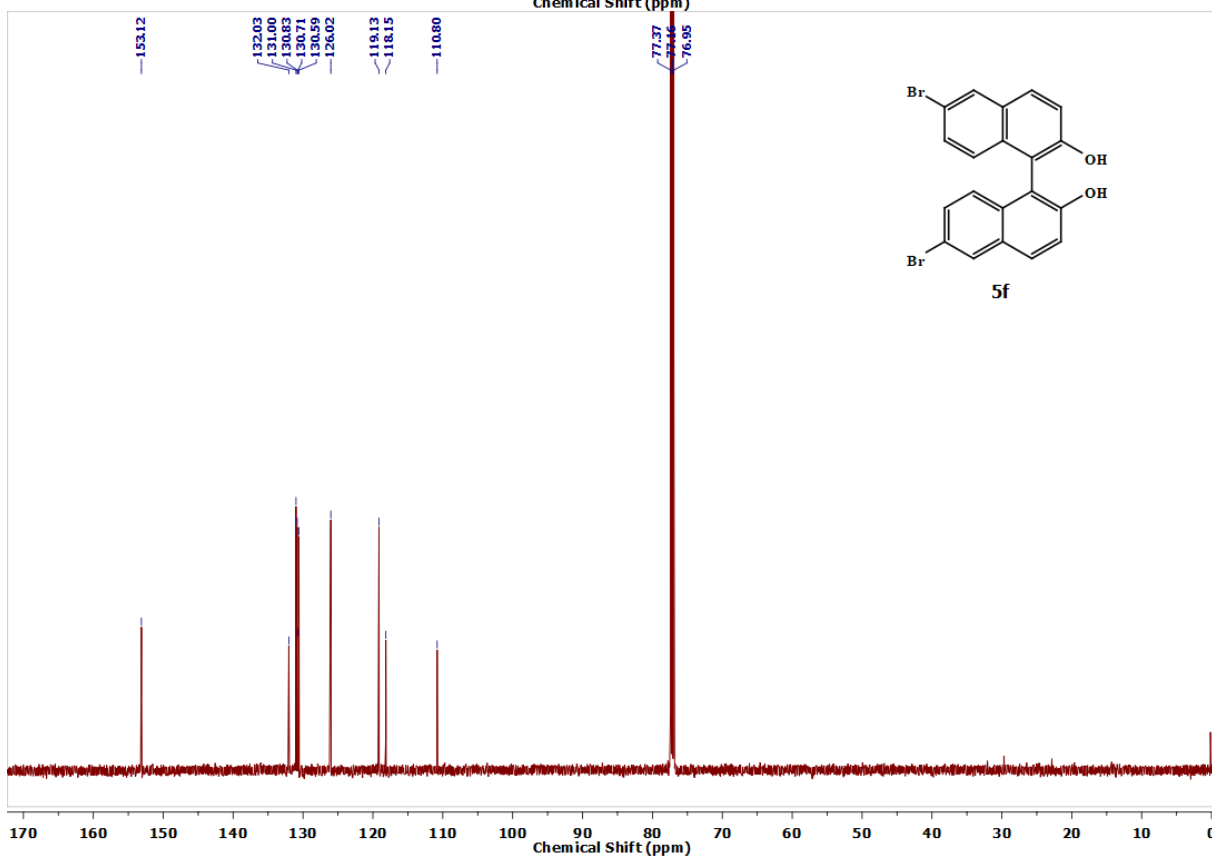



## Supporting Information

- $^1\text{H}$  NMR and  $^{13}\text{C}$  NMR Spectra of Compound **5g** ( $\text{CDCl}_3$ )

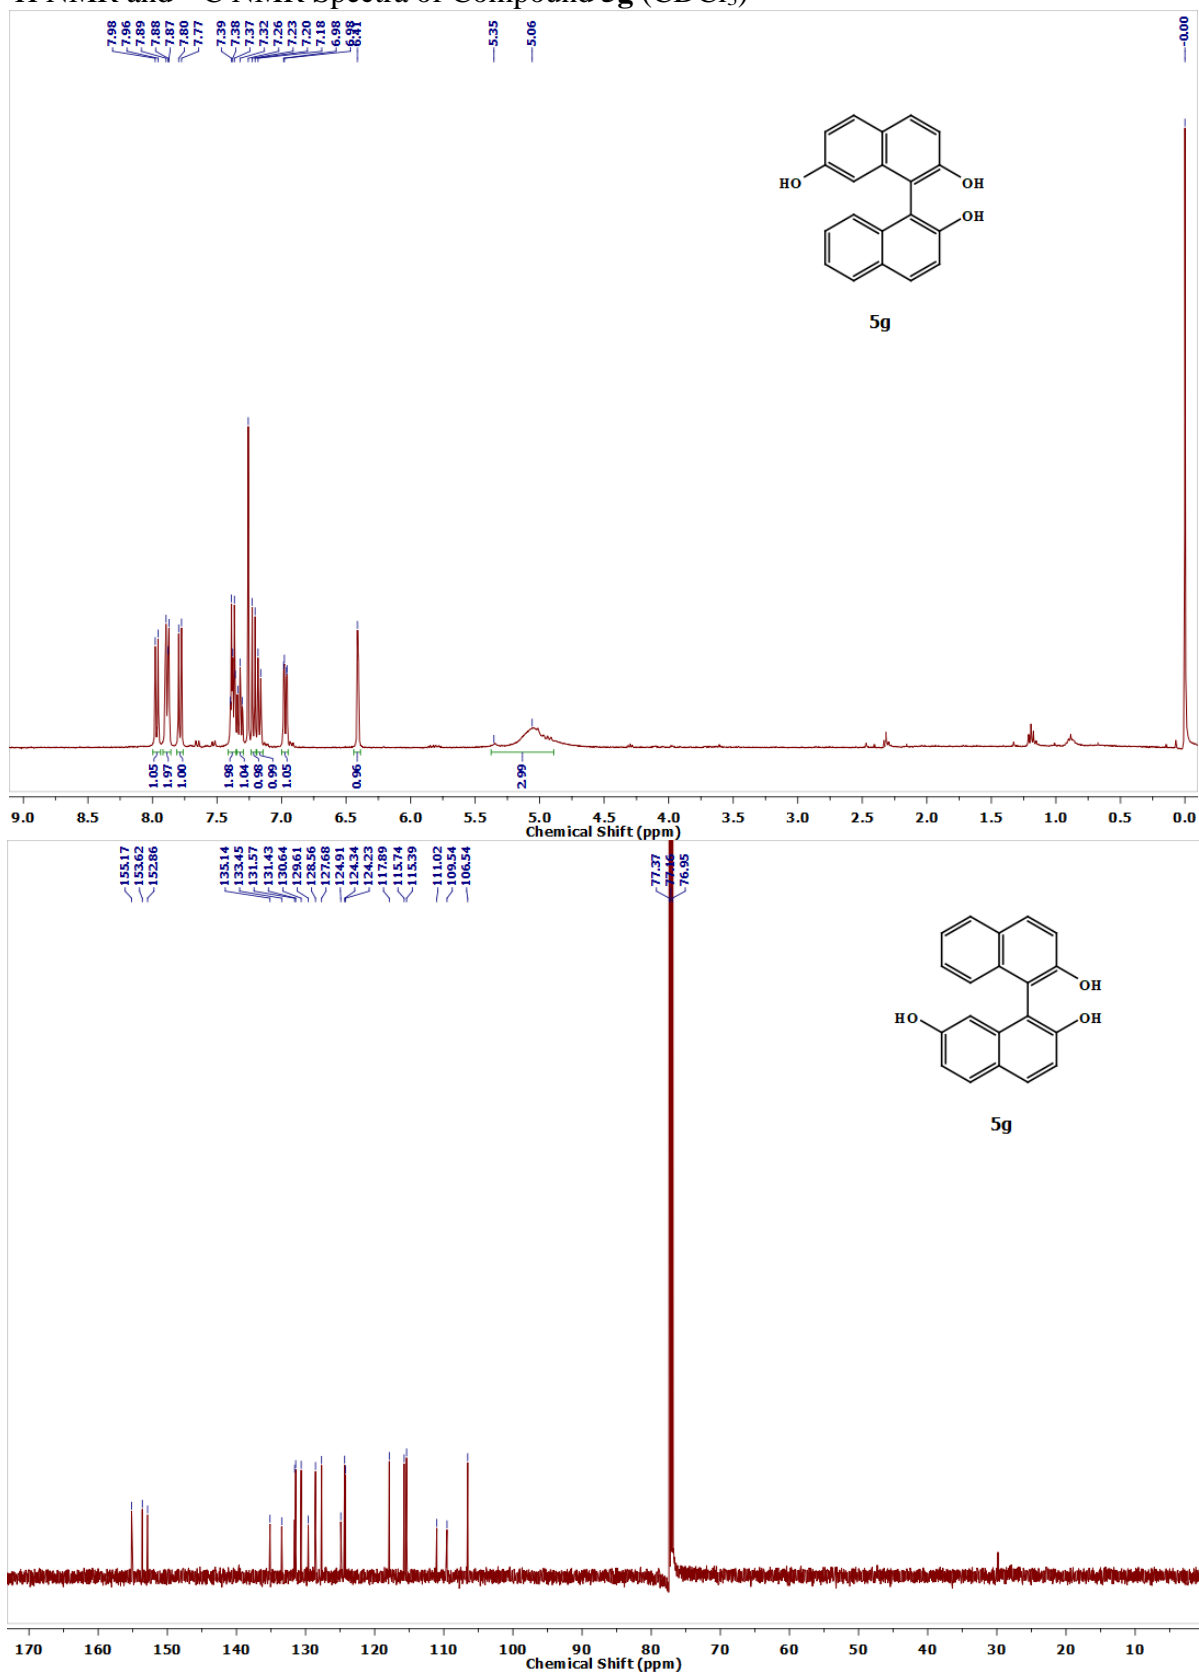

## Supporting Information

- $^1\text{H}$  NMR and  $^{13}\text{C}$  NMR Spectra of Compound **5h** ( $\text{CDCl}_3$ )

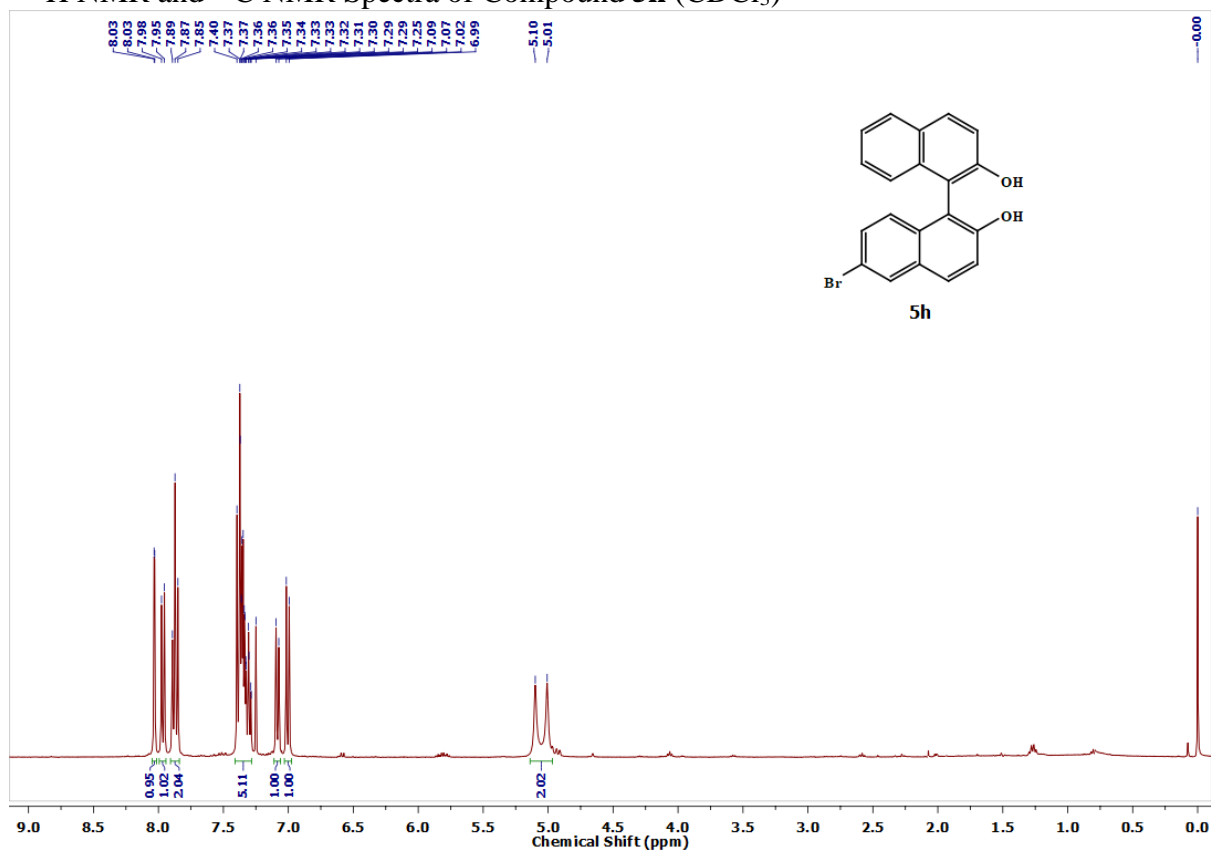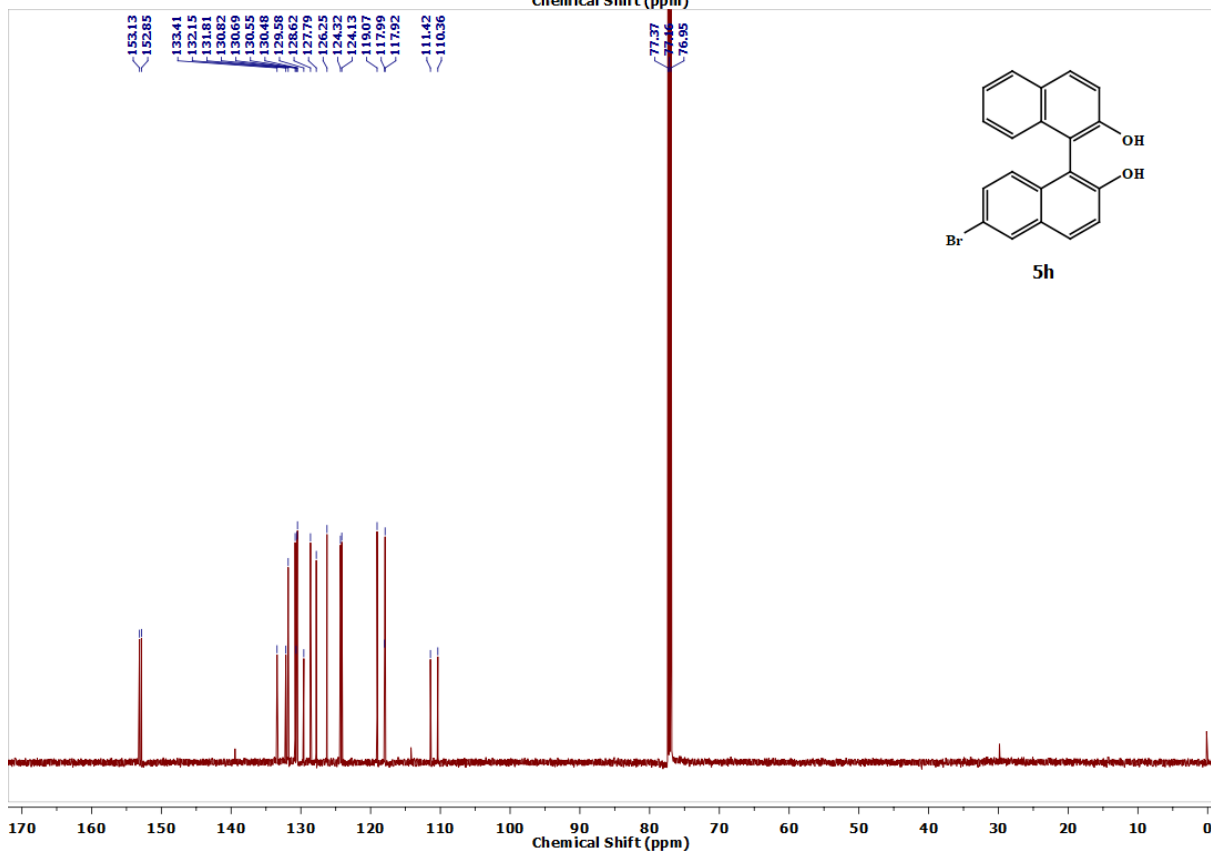

## Supporting Information

### FT-IR Spectra of all synthesized compound

### FT-IR Spectra of compound 3a-3o

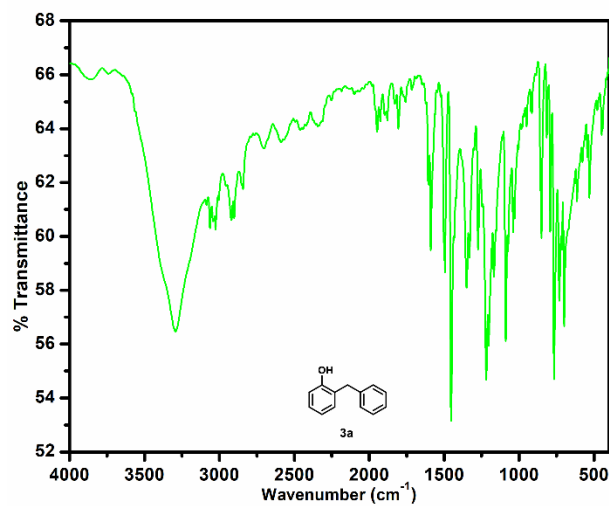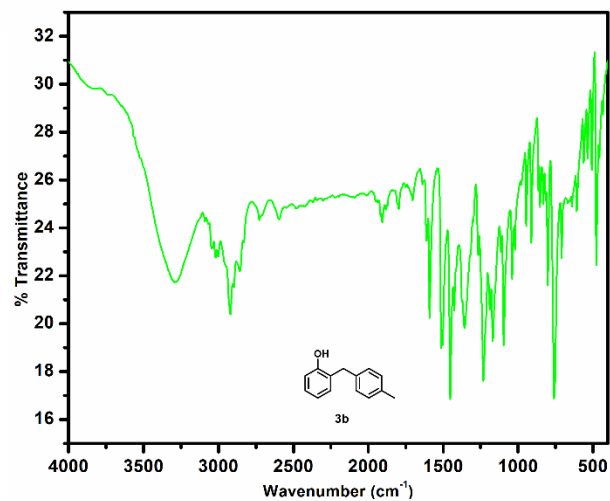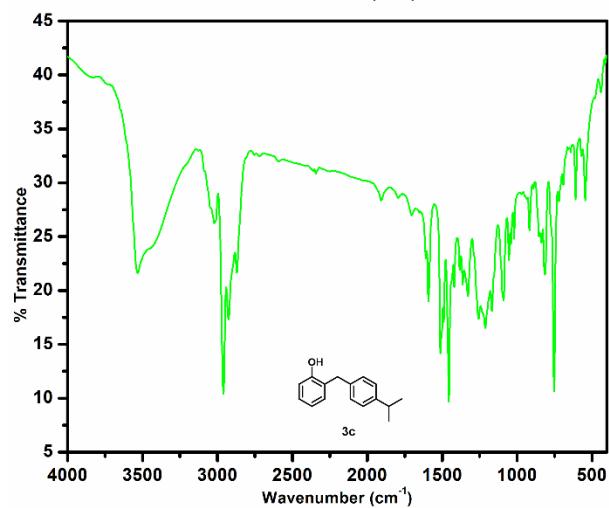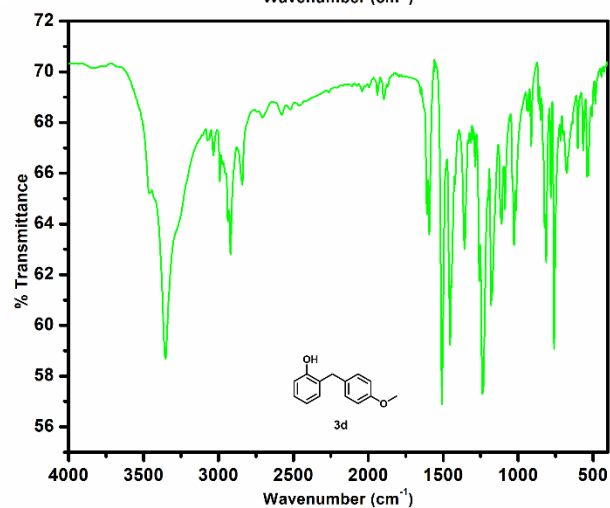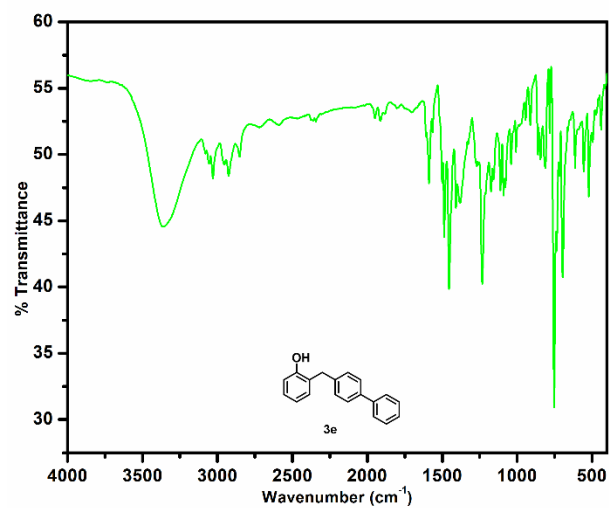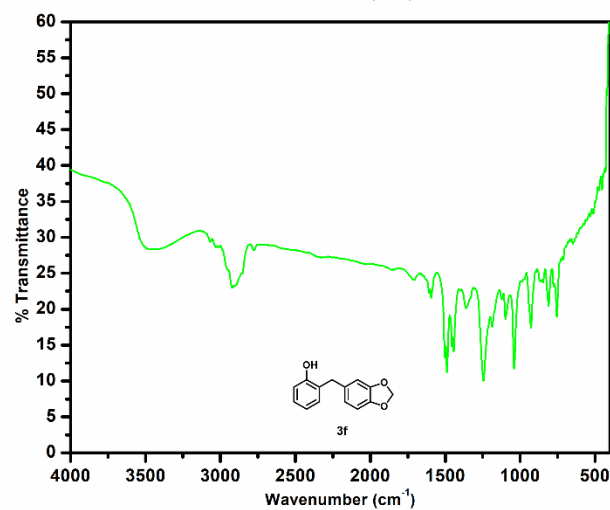

## Supporting Information

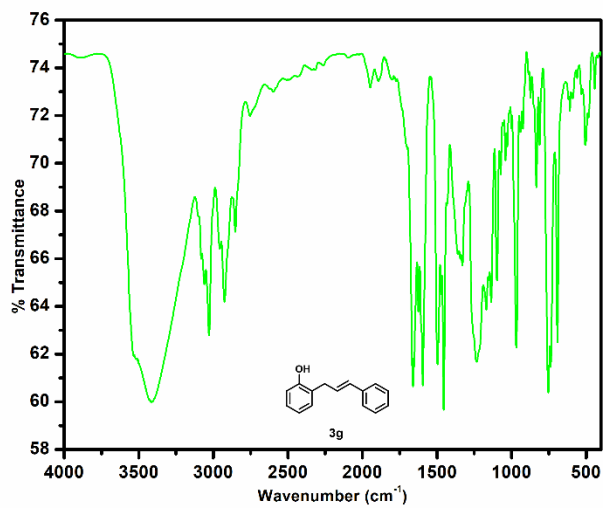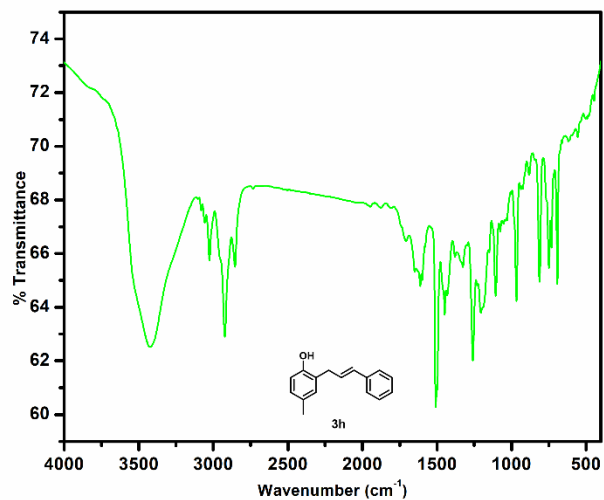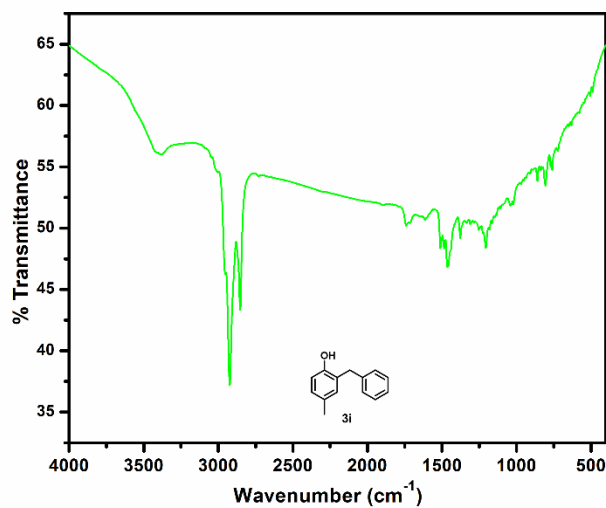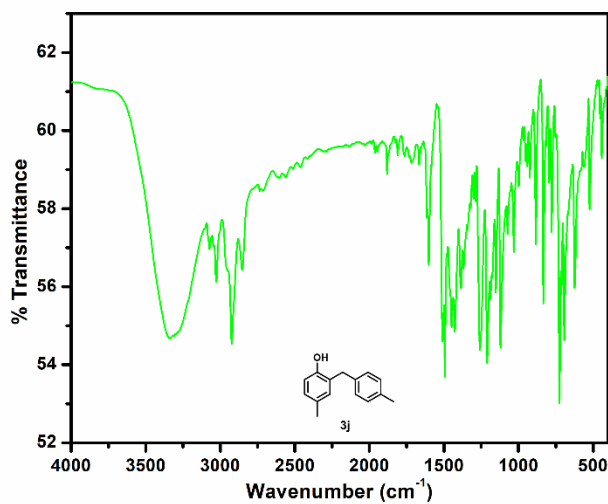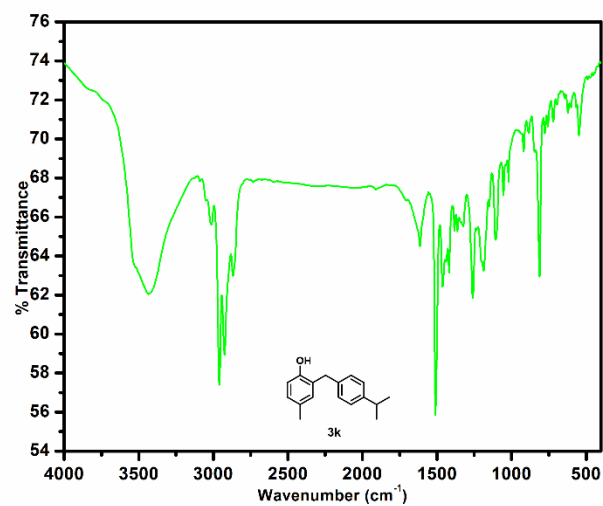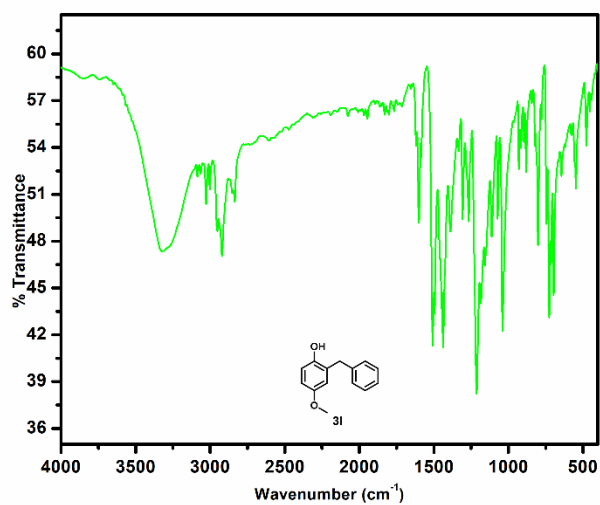

## Supporting Information

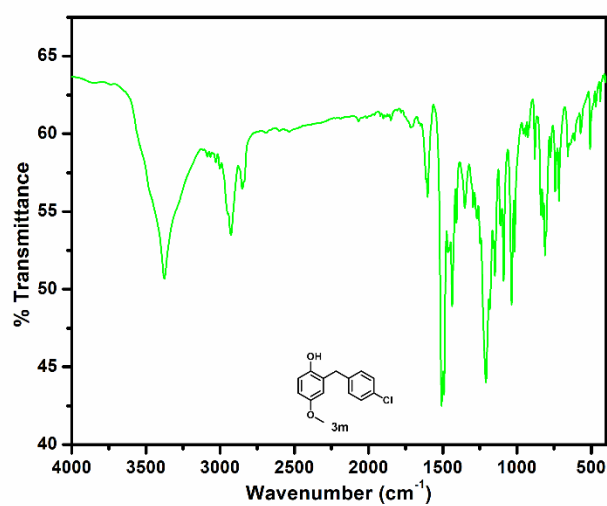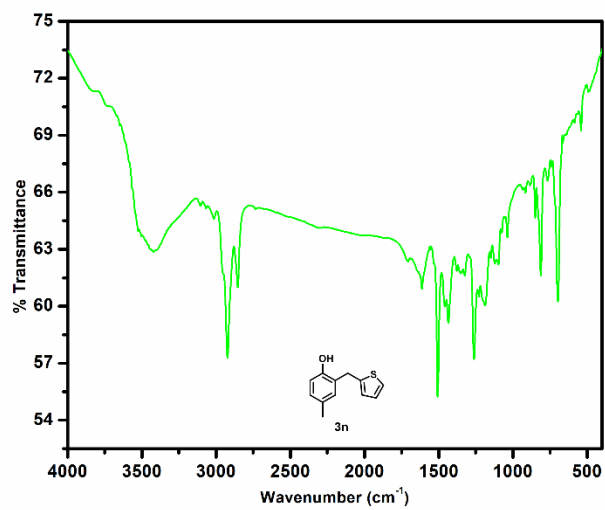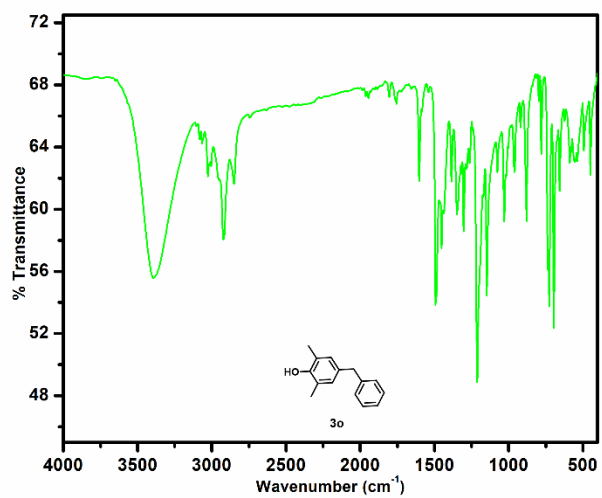

## Supporting Information

### FT-IR Spectra of compound 5a-5h

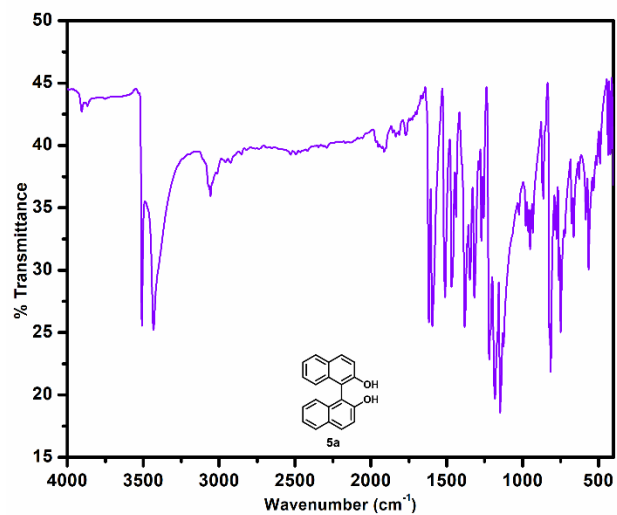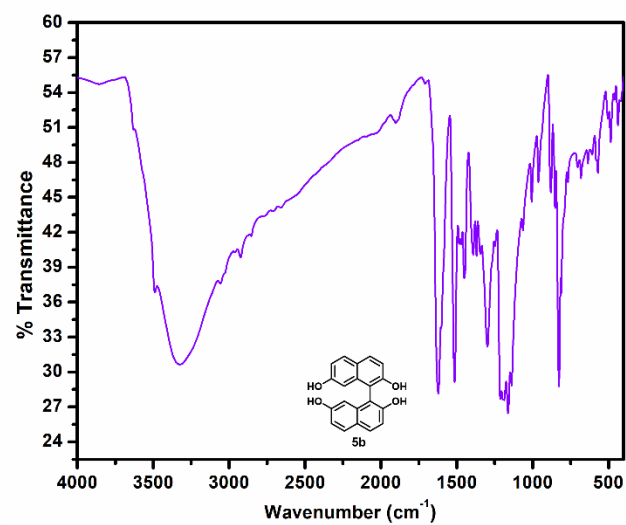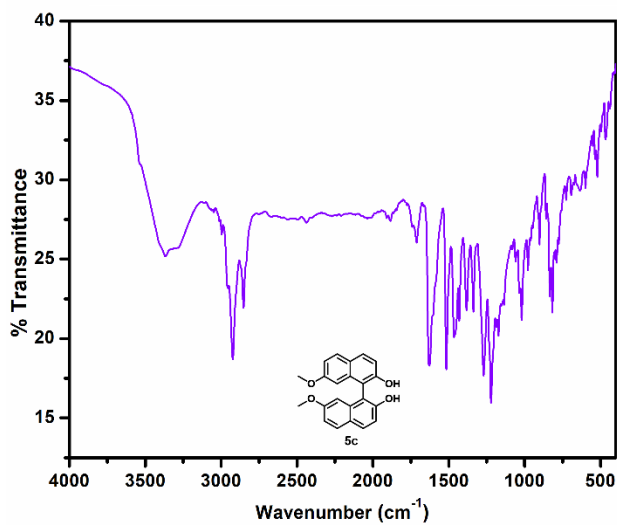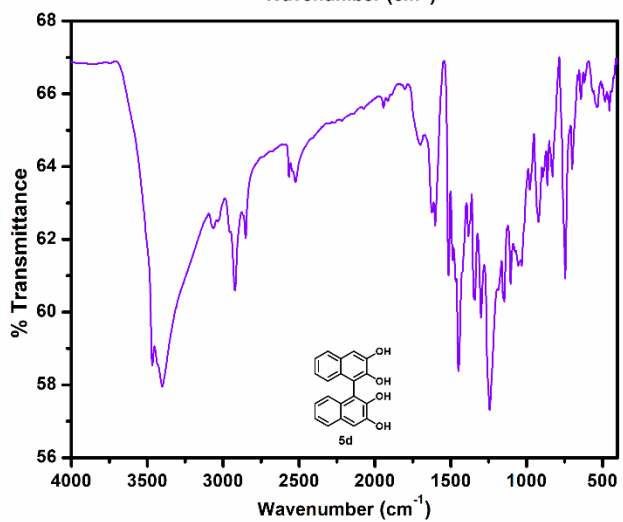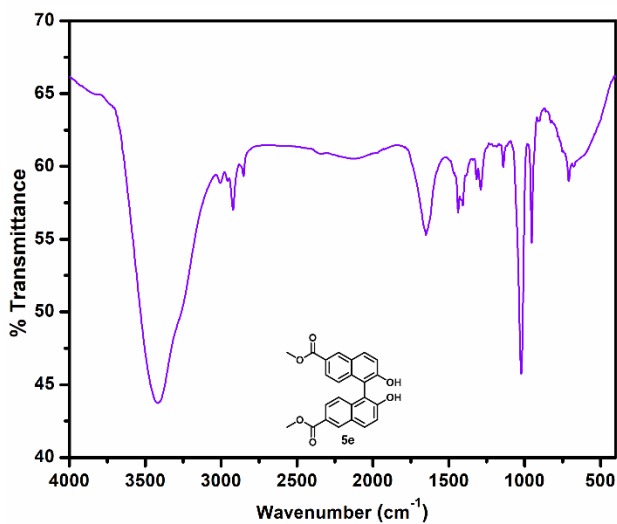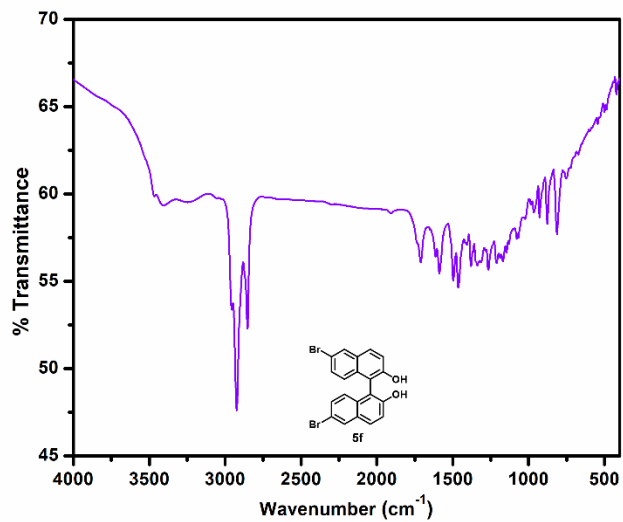

## Supporting Information

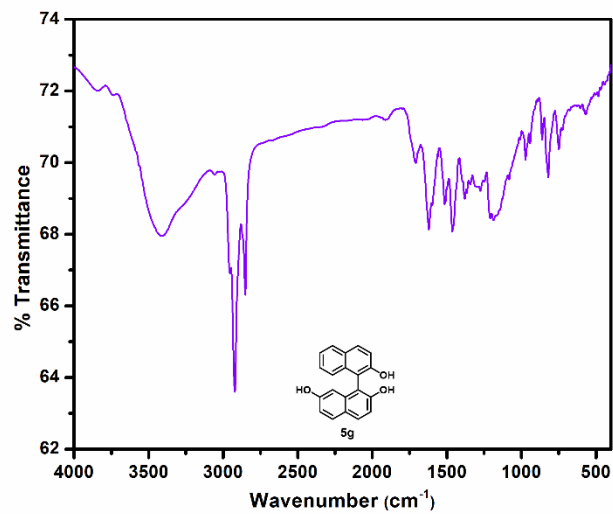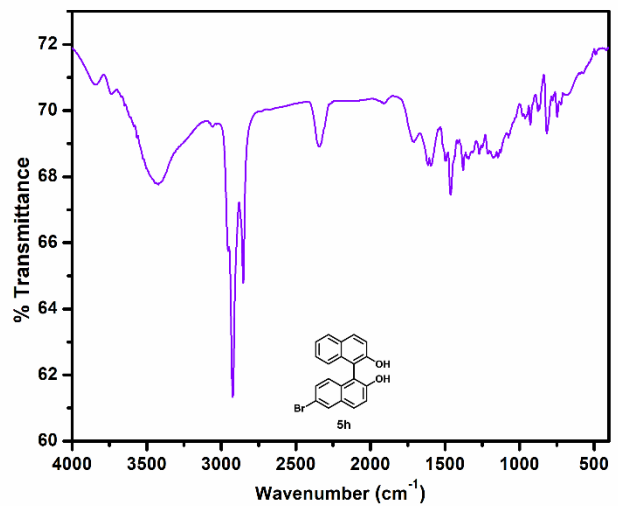

## Supporting Information

**Cartesian Coordinates of all the optimized geometries at B3LYP/6-311+G(d,p)/SDD level of theory**

| Species                                                                   | Atomic No. (Z) | Cartesian Coordinates (in Å) |              |              |
|---------------------------------------------------------------------------|----------------|------------------------------|--------------|--------------|
|                                                                           |                | X                            | Y            | Z            |
| <b>C<sub>6</sub>H<sub>5</sub>CH<sub>2</sub><sup>+</sup></b>               | 6              | 0.000001000                  | -1.126777000 | 1.202201000  |
|                                                                           | 6              | 0.000001000                  | 0.262009000  | 1.232929000  |
|                                                                           | 6              | 0.000001000                  | 0.962225000  | 0.000000000  |
|                                                                           | 6              | 0.000001000                  | 0.262009000  | -1.232929000 |
|                                                                           | 6              | 0.000001000                  | -1.126777000 | -1.202201000 |
|                                                                           | 6              | 0.000001000                  | -1.826630000 | 0.000000000  |
|                                                                           | 1              | 0.000003000                  | -1.656865000 | 2.148620000  |
|                                                                           | 1              | 0.000001000                  | 0.794913000  | 2.173769000  |
|                                                                           | 1              | 0.000001000                  | 0.794913000  | -2.173769000 |
|                                                                           | 1              | 0.000003000                  | -1.656865000 | -2.148620000 |
|                                                                           | 1              | 0.000001000                  | -2.909086000 | 0.000000000  |
|                                                                           | 6              | -0.000006000                 | 2.379194000  | 0.000000000  |
|                                                                           | 1              | 0.928979000                  | 2.960741000  | 0.000000000  |
|                                                                           | 1              | -0.928997000                 | 2.960731000  | 0.000000000  |
| <b>C<sub>6</sub>H<sub>5</sub>CH<sub>3</sub>CH<sub>2</sub><sup>+</sup></b> | 6              | -0.639392000                 | 1.227224000  | -0.010157000 |
|                                                                           | 6              | 0.731444000                  | 1.239836000  | -0.002465000 |
|                                                                           | 6              | 1.439273000                  | -0.000003000 | 0.001161000  |
|                                                                           | 6              | 0.731433000                  | -1.239837000 | -0.002526000 |
|                                                                           | 6              | -0.639401000                 | -1.227212000 | -0.010217000 |
|                                                                           | 6              | -1.353031000                 | 0.000011000  | -0.012748000 |
|                                                                           | 1              | -1.192671000                 | 2.158692000  | -0.016800000 |
|                                                                           | 1              | 1.280491000                  | 2.173890000  | -0.001729000 |
|                                                                           | 1              | 1.280472000                  | -2.173896000 | -0.001837000 |
|                                                                           | 1              | -1.192689000                 | -2.158674000 | -0.016907000 |
|                                                                           | 6              | 2.984052000                  | -0.000008000 | 0.009179000  |
|                                                                           | 1              | 3.525242000                  | 0.939202000  | 0.012687000  |



### Supporting Information

|                                                                           |             |              |              |              |
|---------------------------------------------------------------------------|-------------|--------------|--------------|--------------|
|                                                                           | 1           | 3.525238000  | -0.939220000 | 0.012641000  |
|                                                                           | 6           | -2.842468000 | 0.000002000  | 0.008128000  |
|                                                                           | 1           | -3.183079000 | -0.000383000 | 1.053824000  |
|                                                                           | 1           | -3.257248000 | 0.892964000  | -0.461694000 |
|                                                                           | 1           | -3.257220000 | -0.892658000 | -0.462303000 |
| <b>C<sub>6</sub>H<sub>5</sub>NO<sub>2</sub>CH<sub>2</sub><sup>+</sup></b> | 6           | -0.000781000 | 1.228558000  | -0.161249000 |
|                                                                           | 6           | -1.377911000 | 1.232100000  | -0.170603000 |
|                                                                           | 6           | -2.074422000 | 0.000000000  | 0.000000000  |
|                                                                           | 6           | -1.377911000 | -1.232100000 | 0.170603000  |
|                                                                           | 6           | -0.000781000 | -1.228559000 | 0.161249000  |
|                                                                           | 6           | 0.652381000  | 0.000000000  | 0.000000000  |
|                                                                           | 1           | 0.579041000  | 2.136669000  | -0.264284000 |
|                                                                           | 1           | -1.928405000 | 2.156087000  | -0.299745000 |
|                                                                           | 1           | -1.928405000 | -2.156087000 | 0.299745000  |
|                                                                           | 1           | 0.579041000  | -2.136670000 | 0.264284000  |
|                                                                           | 6           | -3.624022000 | 0.000000000  | 0.000000000  |
|                                                                           | 1           | -4.166277000 | 0.931927000  | -0.124503000 |
|                                                                           | 1           | -4.166277000 | -0.931927000 | 0.124504000  |
|                                                                           | 7           | 2.142663000  | 0.000000000  | 0.000000000  |
|                                                                           | 8           | 2.678333000  | 0.979691000  | 0.481888000  |
| 8                                                                         | 2.678333000 | -0.979691000 | -0.481888000 |              |
|                                                                           | 14          | 2.452232000  | 1.671559000  | 0.000044000  |
|                                                                           | 8           | 2.319587000  | -0.000104000 | -0.000095000 |
|                                                                           | 14          | -0.776240000 | -2.803102000 | -0.000171000 |
|                                                                           | 8           | 0.724168000  | -1.905064000 | 0.000244000  |
|                                                                           | 8           | -1.651761000 | -1.318116000 | 0.000184000  |
|                                                                           | 13          | -3.228289000 | 0.000150000  | 0.000011000  |
|                                                                           | 14          | -0.775963000 | 2.803179000  | -0.000249000 |
|                                                                           | 8           | 0.724361000  | 1.904972000  | 0.000276000  |

### Supporting Information

|                             |            |              |              |              |
|-----------------------------|------------|--------------|--------------|--------------|
| <b>Ru(III)-<br/>Zeolite</b> | 8          | -1.651713000 | 1.318308000  | 0.000016000  |
|                             | 1          | -3.753330000 | -0.000186000 | -1.465695000 |
|                             | 1          | -0.933566000 | -3.514943000 | 1.270115000  |
|                             | 1          | -0.933270000 | -3.514264000 | -1.270879000 |
|                             | 1          | 2.991663000  | -2.175356000 | -1.265180000 |
|                             | 1          | 2.992195000  | -2.175458000 | 1.264699000  |
|                             | 1          | 2.992303000  | 2.175088000  | 1.264937000  |
|                             | 1          | 2.991989000  | 2.175198000  | -1.264943000 |
|                             | 1          | -0.932834000 | 3.514359000  | -1.270966000 |
|                             | 1          | -0.933283000 | 3.515034000  | 1.270030000  |
|                             | 1          | -3.753569000 | 0.000290000  | 1.465599000  |
|                             | 14         | 2.452058000  | -1.671778000 | -0.000105000 |
|                             | 44         | -0.213793000 | 0.000007000  | 0.000088000  |
|                             | <b>IM1</b> | 14           | -1.715520000 | 2.625204000  |
| 8                           |            | -2.110573000 | 2.128383000  | -0.574151000 |
| 14                          |            | -2.436690000 | -1.894454000 | -0.697215000 |
| 8                           |            | -1.813132000 | -0.399502000 | -1.333387000 |
| 8                           |            | -1.178097000 | -2.013366000 | 0.431088000  |
| 13                          |            | -0.096933000 | -2.524764000 | 1.959978000  |
| 14                          |            | 0.346455000  | 0.717266000  | 2.622804000  |
| 8                           |            | -0.589974000 | 1.453189000  | 1.441053000  |
| 8                           |            | 0.630907000  | -0.741049000 | 1.772263000  |
| 1                           |            | -0.949234000 | -2.637302000 | 3.263067000  |
| 1                           |            | -2.352725000 | -2.944947000 | -1.715854000 |
| 1                           |            | -3.740129000 | -1.657771000 | -0.063171000 |
| 1                           |            | -3.995474000 | 0.851476000  | -1.820997000 |
| 1                           |            | -1.910184000 | 1.515727000  | -3.040384000 |
| 1                           |            | -1.040387000 | 3.926834000  | 0.876305000  |
| 1                           |            | -2.880091000 | 2.556425000  | 1.849768000  |
| 1                           |            | -0.413225000 | 0.429903000  | 3.847231000  |

### Supporting Information

|  |    |              |              |              |
|--|----|--------------|--------------|--------------|
|  | 1  | 1.613710000  | 1.439160000  | 2.795954000  |
|  | 1  | 0.982663000  | -3.473608000 | 1.299294000  |
|  | 14 | -2.551473000 | 1.123244000  | -1.780815000 |
|  | 44 | 0.015881000  | -0.482309000 | -0.166706000 |
|  | 6  | 1.609321000  | 0.588858000  | -1.517293000 |
|  | 6  | 2.731008000  | -0.230165000 | -1.161977000 |
|  | 6  | 3.772550000  | 0.322547000  | -0.435452000 |
|  | 6  | 3.734771000  | 1.677372000  | -0.074433000 |
|  | 6  | 2.644820000  | 2.490120000  | -0.408255000 |
|  | 6  | 1.595502000  | 1.959606000  | -1.144368000 |
|  | 1  | 1.004776000  | 0.287197000  | -2.375599000 |
|  | 1  | 4.625099000  | -0.284514000 | -0.152644000 |
|  | 1  | 4.568327000  | 2.101621000  | 0.474575000  |
|  | 1  | 2.646399000  | 3.538028000  | -0.133978000 |
|  | 1  | 0.787509000  | 2.597759000  | -1.482436000 |
|  | 6  | 2.679733000  | -1.687628000 | -1.540537000 |
|  | 1  | 2.775018000  | -1.833623000 | -2.619179000 |
|  | 1  | 3.451418000  | -2.266127000 | -1.033659000 |
|  | 1  | 1.356158000  | -2.163514000 | -1.145070000 |
|  | 8  | 1.420547000  | -2.937767000 | -0.557798000 |
|  | 14 | -2.041284000 | -1.109116000 | -2.438024000 |
|  | 8  | -1.900879000 | -2.277503000 | -1.302444000 |
|  | 14 | -0.412293000 | -1.644888000 | 2.718519000  |
|  | 8  | -0.964334000 | -1.832233000 | 1.107448000  |
|  | 8  | -0.445782000 | 0.069420000  | 2.593745000  |
|  | 13 | -1.221816000 | 3.692905000  | 1.133559000  |
|  | 14 | -1.939624000 | 2.021534000  | -1.569108000 |
|  | 8  | -1.725291000 | 0.328750000  | -1.511326000 |
|  | 8  | -1.401109000 | 2.246048000  | 0.039840000  |

**Supporting Information**

|            |             |              |              |              |
|------------|-------------|--------------|--------------|--------------|
| <b>IM2</b> | 1           | -1.738859000 | 4.982813000  | 0.427696000  |
|            | 1           | 0.958302000  | -2.138549000 | 2.895009000  |
|            | 1           | -1.434948000 | -2.112728000 | 3.658473000  |
|            | 1           | -2.429391000 | -3.897627000 | 0.621925000  |
|            | 1           | -0.105845000 | -3.824499000 | -0.293338000 |
|            | 1           | -0.977989000 | -1.202156000 | -3.447223000 |
|            | 1           | -3.414945000 | -0.990179000 | -2.940133000 |
|            | 1           | -3.358833000 | 2.369313000  | -1.715481000 |
|            | 1           | -1.008059000 | 2.634625000  | -2.524410000 |
|            | 1           | -0.576286000 | 3.255110000  | 2.484976000  |
|            | 14          | -1.359253000 | -3.114694000 | -0.005906000 |
|            | 44          | -0.941691000 | 0.235732000  | 0.503106000  |
|            | 6           | 3.593402000  | -0.975103000 | -1.049268000 |
|            | 6           | 4.940506000  | -1.235526000 | -0.822583000 |
|            | 6           | 5.762744000  | -0.238867000 | -0.293564000 |
|            | 6           | 5.239238000  | 1.020969000  | 0.003473000  |
|            | 6           | 3.892740000  | 1.283497000  | -0.224054000 |
|            | 6           | 3.062031000  | 0.289886000  | -0.760776000 |
|            | 1           | 2.960618000  | -1.746097000 | -1.476999000 |
|            | 1           | 5.353906000  | -2.206663000 | -1.066595000 |
|            | 1           | 6.813500000  | -0.440537000 | -0.122520000 |
|            | 1           | 5.883582000  | 1.796330000  | 0.399843000  |
|            | 1           | 3.493094000  | 2.269157000  | -0.008581000 |
|            | 6           | 1.612213000  | 0.569744000  | -1.002876000 |
|            | 1           | 1.434046000  | 1.625547000  | -1.231444000 |
|            | 1           | 1.205201000  | -0.049271000 | -1.807130000 |
|            | 8           | 0.924110000  | 0.247826000  | 0.243480000  |
| 1          | 0.284312000 | 0.609675000  | 2.928225000  |              |
|            | 14          | -0.142363000 | -2.460386000 | 0.033673000  |
|            | 8           | -1.752498000 | -2.616317000 | -0.189259000 |

### Supporting Information

|            |             |              |              |              |
|------------|-------------|--------------|--------------|--------------|
| <b>IM3</b> | 14          | -4.527086000 | 0.674771000  | -0.215928000 |
|            | 8           | -3.419682000 | -0.613257000 | -0.205355000 |
|            | 8           | -3.226759000 | 1.808235000  | -0.281162000 |
|            | 13          | 0.156863000  | 3.467394000  | -0.142328000 |
|            | 14          | 1.450430000  | 0.399263000  | -0.144086000 |
|            | 8           | 0.108679000  | -0.738823000 | -0.109779000 |
|            | 8           | 0.113940000  | 1.669092000  | -0.202168000 |
|            | 1           | 1.592067000  | 4.072704000  | -0.183785000 |
|            | 1           | -5.257653000 | 0.794989000  | 1.050909000  |
|            | 1           | -5.306386000 | 0.709007000  | -1.457558000 |
|            | 1           | -4.065575000 | -2.871986000 | -1.270878000 |
|            | 1           | -3.912297000 | -2.714023000 | 1.217563000  |
|            | 1           | 0.263202000  | -2.838951000 | 1.393605000  |
|            | 1           | 0.593436000  | -3.092952000 | -1.065660000 |
|            | 1           | 2.025358000  | 0.733341000  | -1.454314000 |
|            | 1           | 1.996285000  | 0.802636000  | 1.158359000  |
|            | 1           | -1.306631000 | 4.029161000  | -0.083129000 |
|            | 14          | -3.365024000 | -2.345333000 | -0.094197000 |
|            | 44          | -1.538402000 | 0.547163000  | 0.066498000  |
|            | 6           | 4.890982000  | -0.473243000 | 1.203443000  |
|            | 6           | 6.153602000  | 0.074543000  | 1.238664000  |
|            | 6           | 6.831350000  | 0.353245000  | 0.036902000  |
|            | 6           | 6.232099000  | 0.076136000  | -1.206213000 |
|            | 6           | 4.969923000  | -0.471965000 | -1.252879000 |
|            | 6           | 4.265322000  | -0.779395000 | -0.046265000 |
|            | 1           | 4.370293000  | -0.703876000 | 2.126272000  |
|            | 1           | 6.632868000  | 0.283645000  | 2.187182000  |
|            | 1           | 7.826181000  | 0.782183000  | 0.069106000  |
|            | 1           | 6.771413000  | 0.286174000  | -2.121712000 |
|            | 1           | 4.510192000  | -0.702916000 | -2.207418000 |
| 6          | 2.978358000 | -1.377525000 | -0.088730000 |              |

### Supporting Information

|            |             |              |              |              |
|------------|-------------|--------------|--------------|--------------|
|            | 1           | 2.699589000  | -1.864771000 | -1.019805000 |
|            | 1           | 2.644983000  | -1.864372000 | 0.826081000  |
|            | 8           | -1.687292000 | 0.501961000  | 1.790135000  |
|            | 1           | -3.271198000 | 2.754387000  | -0.081761000 |
| <b>IM4</b> | 14          | -2.575525000 | 0.992661000  | -2.710498000 |
|            | 8           | -2.739295000 | -0.623056000 | -2.521829000 |
|            | 14          | -1.916791000 | -2.708633000 | 1.103358000  |
|            | 8           | -2.447434000 | -2.072724000 | -0.325964000 |
|            | 8           | -1.710132000 | -1.201895000 | 1.922041000  |
|            | 13          | -4.902428000 | 1.022307000  | 2.593591000  |
|            | 14          | -4.114057000 | 2.275069000  | -0.259820000 |
|            | 8           | -2.792879000 | 1.642944000  | -1.126872000 |
|            | 8           | -3.957429000 | 1.268528000  | 1.089769000  |
|            | 1           | -6.205845000 | 1.879388000  | 2.657350000  |
|            | 1           | -0.615125000 | -3.381166000 | 0.980125000  |
|            | 1           | -2.957768000 | -3.474361000 | 1.803024000  |
|            | 1           | -3.896346000 | -2.879108000 | -2.278981000 |
|            | 1           | -1.430883000 | -2.826021000 | -2.557472000 |
|            | 1           | -1.216287000 | 1.358898000  | -3.124353000 |
|            | 1           | -3.666070000 | 1.539809000  | -3.530737000 |
|            | 1           | -5.365413000 | 2.028502000  | -0.993137000 |
|            | 1           | -3.848166000 | 3.673943000  | 0.100605000  |
|            | 1           | -4.203576000 | -0.008100000 | 3.539674000  |
|            | 14          | -2.633364000 | -2.181962000 | -2.003904000 |
|            | 44          | -1.916502000 | 0.397180000  | 0.480946000  |
|            | 6           | 5.503564000  | 2.256886000  | 0.915047000  |
|            | 6           | 6.869450000  | 2.061133000  | 0.927971000  |
|            | 6           | 7.489794000  | 1.434259000  | -0.162926000 |
| 6          | 6.750401000 | 0.998441000  | -1.270108000 |              |
| 6          | 5.383166000 | 1.192914000  | -1.296197000 |              |

### Supporting Information

|  |    |              |              |              |
|--|----|--------------|--------------|--------------|
|  | 6  | 4.732507000  | 1.836291000  | -0.205973000 |
|  | 1  | 5.009620000  | 2.747799000  | 1.746131000  |
|  | 1  | 7.464030000  | 2.394039000  | 1.769548000  |
|  | 1  | 8.564331000  | 1.289226000  | -0.151014000 |
|  | 1  | 7.252762000  | 0.520642000  | -2.101806000 |
|  | 1  | 4.799110000  | 0.873859000  | -2.151726000 |
|  | 6  | 3.356267000  | 2.079075000  | -0.247082000 |
|  | 1  | 2.802614000  | 1.918377000  | -1.163110000 |
|  | 1  | 2.885260000  | 2.689841000  | 0.511539000  |
|  | 8  | -0.253196000 | 0.328587000  | -0.085986000 |
|  | 1  | -1.411186000 | -1.131630000 | 2.836543000  |
|  | 6  | 3.969438000  | -1.226445000 | 1.398347000  |
|  | 6  | 3.007772000  | -0.853184000 | 0.461298000  |
|  | 6  | 2.709771000  | -1.665837000 | -0.634033000 |
|  | 6  | 3.372241000  | -2.883389000 | -0.772302000 |
|  | 6  | 4.333512000  | -3.272915000 | 0.161595000  |
|  | 6  | 4.630562000  | -2.443004000 | 1.242186000  |
|  | 1  | 4.172638000  | -0.580089000 | 2.243234000  |
|  | 1  | 1.969107000  | -1.350310000 | -1.360842000 |
|  | 1  | 3.144353000  | -3.524975000 | -1.615373000 |
|  | 1  | 4.848604000  | -4.218739000 | 0.046270000  |
|  | 1  | 5.372570000  | -2.745717000 | 1.971355000  |
|  | 8  | 2.380680000  | 0.373308000  | 0.639642000  |
|  | 1  | 1.452460000  | 0.349207000  | 0.303563000  |
|  | 14 | 1.869416000  | 1.810435000  | -2.059352000 |
|  | 8  | 2.280419000  | 2.751639000  | -0.801605000 |
|  | 14 | 4.517502000  | 0.787304000  | 1.454040000  |
|  | 8  | 3.999779000  | 2.294252000  | 1.163921000  |
|  | 8  | 3.098532000  | -0.228154000 | 1.567689000  |
|  | 13 | 2.390140000  | -4.019480000 | -0.580551000 |

### Supporting Information

|            |             |              |              |              |
|------------|-------------|--------------|--------------|--------------|
| <b>IM5</b> | 14          | 2.499585000  | -1.267632000 | -2.277916000 |
|            | 8           | 2.038183000  | 0.184687000  | -1.506181000 |
|            | 8           | 2.211560000  | -2.290447000 | -0.990352000 |
|            | 1           | 3.035426000  | -4.876284000 | -1.717017000 |
|            | 1           | 5.158915000  | 0.653978000  | 2.767874000  |
|            | 1           | 5.254872000  | 0.232993000  | 0.307456000  |
|            | 1           | 4.371675000  | 4.203534000  | -0.496439000 |
|            | 1           | 2.515568000  | 4.359689000  | 1.147644000  |
|            | 1           | 0.451707000  | 2.003563000  | -2.394491000 |
|            | 1           | 2.790037000  | 1.922201000  | -3.205891000 |
|            | 1           | 3.927043000  | -1.202440000 | -2.628849000 |
|            | 1           | 1.601585000  | -1.536590000 | -3.412949000 |
|            | 1           | 1.838099000  | -4.329777000 | 0.848753000  |
|            | 14          | 3.318401000  | 3.509482000  | 0.260394000  |
|            | 44          | 1.306659000  | -0.570763000 | 0.473433000  |
|            | 6           | -5.876383000 | 0.284401000  | -1.436910000 |
|            | 6           | -7.171781000 | 0.557244000  | -1.060486000 |
|            | 6           | -7.412758000 | 1.453524000  | -0.004625000 |
|            | 6           | -6.361098000 | 2.075750000  | 0.685496000  |
|            | 6           | -5.058578000 | 1.811282000  | 0.320373000  |
|            | 6           | -4.781999000 | 0.920535000  | -0.766239000 |
|            | 1           | -5.671332000 | -0.395251000 | -2.256236000 |
|            | 1           | -8.004413000 | 0.094191000  | -1.575109000 |
|            | 1           | -8.436097000 | 1.670400000  | 0.281906000  |
|            | 1           | -6.578227000 | 2.763328000  | 1.493313000  |
|            | 1           | -4.232941000 | 2.291418000  | 0.832173000  |
|            | 6           | -3.483555000 | 0.729085000  | -1.204610000 |
|            | 1           | -2.659785000 | 1.290221000  | -0.785922000 |
|            | 1           | -3.275919000 | 0.139549000  | -2.088494000 |
|            | 8           | 0.824563000  | -1.245804000 | 2.192482000  |
| 1          | 2.893028000 | -0.602067000 | 2.442136000  |              |



### Supporting Information

|  |    |              |              |              |
|--|----|--------------|--------------|--------------|
|  | 6  | -2.628647000 | -1.767090000 | -0.272564000 |
|  | 6  | -1.794977000 | -0.807064000 | 0.352904000  |
|  | 6  | -2.168022000 | -0.298577000 | 1.617314000  |
|  | 6  | -3.327065000 | -0.750576000 | 2.230739000  |
|  | 6  | -4.135083000 | -1.719798000 | 1.615400000  |
|  | 6  | -3.776639000 | -2.227947000 | 0.371356000  |
|  | 1  | -2.317795000 | -2.180107000 | -1.225417000 |
|  | 1  | -1.535725000 | 0.437407000  | 2.100210000  |
|  | 1  | -3.600934000 | -0.362668000 | 3.205259000  |
|  | 1  | -5.022192000 | -2.083494000 | 2.119320000  |
|  | 1  | -4.384651000 | -2.990311000 | -0.101729000 |
|  | 8  | -0.672654000 | -0.417662000 | -0.270403000 |
|  | 1  | 0.065035000  | -1.843618000 | 2.244987000  |
|  | 14 | 3.784320000  | -1.843665000 | -0.567712000 |
|  | 8  | 2.976571000  | -0.575962000 | -1.355807000 |
|  | 14 | 1.892856000  | 2.961976000  | -0.922552000 |
|  | 8  | 2.411482000  | 1.901556000  | -2.083487000 |
|  | 8  | 1.601026000  | 2.007176000  | 0.435961000  |
|  | 13 | 1.933831000  | 1.966997000  | 2.228300000  |
|  | 14 | 2.943789000  | -1.228433000 | 2.471333000  |
|  | 8  | 2.927785000  | -1.812475000 | 0.873837000  |
|  | 8  | 2.032415000  | 0.147831000  | 2.233703000  |
|  | 1  | 3.317461000  | 2.683168000  | 2.647245000  |
|  | 1  | 0.622761000  | 3.549453000  | -1.379475000 |
|  | 1  | 2.941103000  | 3.945374000  | -0.600998000 |
|  | 1  | 4.718430000  | 0.843091000  | -2.598814000 |
|  | 1  | 2.703486000  | 0.077102000  | -3.831696000 |
|  | 1  | 3.521088000  | -3.111079000 | -1.259604000 |
|  | 1  | 5.200611000  | -1.498804000 | -0.365331000 |
|  | 1  | 4.322355000  | -0.917797000 | 2.882779000  |

### Supporting Information

|            |    |              |              |              |
|------------|----|--------------|--------------|--------------|
| <b>IM6</b> | 1  | 2.229221000  | -2.201697000 | 3.307174000  |
|            | 1  | 0.664557000  | 2.493587000  | 3.079889000  |
|            | 14 | 3.266347000  | 0.598313000  | -2.578848000 |
|            | 44 | 1.172789000  | -0.201874000 | 0.148560000  |
|            | 6  | -5.689726000 | 1.035405000  | -0.821090000 |
|            | 6  | -6.562633000 | 1.502634000  | 0.140480000  |
|            | 6  | -6.092247000 | 1.765824000  | 1.444637000  |
|            | 6  | -4.734208000 | 1.558968000  | 1.767052000  |
|            | 6  | -3.865388000 | 1.092728000  | 0.803210000  |
|            | 6  | -4.324481000 | 0.815095000  | -0.512004000 |
|            | 1  | -6.045396000 | 0.847877000  | -1.827899000 |
|            | 1  | -7.604421000 | 1.675243000  | -0.100448000 |
|            | 1  | -6.775783000 | 2.136670000  | 2.199594000  |
|            | 1  | -4.381810000 | 1.779503000  | 2.767146000  |
|            | 1  | -2.817252000 | 0.957412000  | 1.043248000  |
|            | 6  | -3.379061000 | 0.329495000  | -1.579704000 |
|            | 1  | -3.854117000 | 0.429579000  | -2.556662000 |
|            | 1  | -2.476381000 | 0.946529000  | -1.588978000 |
|            | 6  | -2.911446000 | -1.164600000 | -1.435501000 |
|            | 6  | -1.773813000 | -1.369054000 | -0.458117000 |
|            | 6  | -1.813614000 | -2.469338000 | 0.433704000  |
|            | 6  | -2.895176000 | -3.314699000 | 0.441822000  |
|            | 6  | -4.021312000 | -3.155291000 | -0.433346000 |
|            | 6  | -4.042059000 | -2.132227000 | -1.311845000 |
|            | 1  | -2.439485000 | -1.393579000 | -2.409229000 |
|            | 1  | -0.983580000 | -2.624030000 | 1.113592000  |
|            | 1  | -2.901172000 | -4.145724000 | 1.140272000  |
|            | 1  | -4.838689000 | -3.863063000 | -0.376473000 |
|            | 1  | -4.878885000 | -2.000838000 | -1.989801000 |
|            | 8  | -0.796528000 | -0.555723000 | -0.517575000 |

## Supporting Information

### 8. References

---

1. SAINT Plus (v 6.14); Bruker AXS Inc.: Madison, WI, 2008.
2. H. Talukdar, G. Saikia, A. Das, S. Y. Sultana and N. S. Islam, *J. Ind. Eng. Chem.*, 2023, **121**, 249-263.
3. C. F. Macrae, I. Sovago, S. J. Cottrell, P. T. Galek, P. McCabe, E. Pidcock, M. Platings, G. P. Shields, J. S. Stevens, M. Towler and P. A. Wood, *J. Appl. Cryst.*, 2020, **53**, 226-235.
4. D. H. Lee, K. H. Kwon and C. S. Yi, *J. Am. Chem. Soc.*, 2012, **134**, 7325-7328.
5. G. D. Yadav and G. S. Pathre, *Synth. Commun.*, 2008, **38**, 2684-2691.
6. B. Smutek, W. Kunz and F. Goettmann, *C R Chim.*, 2012, **15**, 96-101.
7. M. Rueping, B. J. Nachtsheim and W. Ieawsuwan, *Adv. Synth. Catal.*, 2006, **348**, 1033-1037.
8. D. P. Sawant, A. Vinu, N. E. Jacob, F. Lefebvre and S. B. Halligudi, *J. Catal.*, 2005, **235**, 341-352.
9. S. I. Naya, Y. Hiramoto, M. Teranishi and H. Tada, *Chem. Commun.* 2015, **51**, 17669-17671.
10. Z. He, A. P. Pulis and D. J. Procter, *Angew. Chem., Int. Ed.*, 2019, **58**, 7813-7817.
11. M. Sharma, B. Das, M. J. Baruah, S. Biswas, S. Roy, A. Hazarika, S. K. Bhargava and K. K. Bania, *ACS Catal.*, 2019, **9**, 5860-5875.
12. B. Das, M. Sharma, M. J. Baruah, B. P. Mounash, G. V. Karunakar and K. K. Bania, *J. Environ. Chem. Eng.*, 2020, **8**, 104268.
13. N. J. Arokianathar, K. Kolodziejczak, E. F. Bugden F. K. Clark, T. Tuttle and A. Murphy, *Adv. Synth. Catal.*, 2020, **362**, 2260-2267.
14. Y. Ohtake, T. Sato, H. Matsuoka, M. Nishimoto, N. Taka, K. Takano, K. Yamamoto, M. Ohmori, T. Higuchi, M. Murakata, T. Kobayashi, K. Morikawa, N. Shimma, M. Suzuki, H. Hagita, K. Ozawa, K. Yamaguchi, M. Kato and S. Ikeda, *Bioorg. Med. Chem.*, 2011, **19**, 5334-5341.
15. (a) J. Kim, N. Pannilawithana and C. S. Yi, *ACS Catal.*, 2016, **6**, 8395-8398; (b) T. K. M. Shing, W. L. Ng, J. Y. W. Chan and C. B. S. Lau, *Angew. Chem., Int. Ed.*, 2013, **52**, 8401-8405.
16. L. Bering, K. Jeyakumar and A. P. Antonchick, *Org. Lett.*, 2018, **20**, 3911-3914.
17. T. Medina-Gil, A. Sadurní, L. A. Hammarback and A. M. Echavarren, *ACS catal.*, 2023, **13**, 10751-10755.
18. M. Rehan, R. Nallagonda, B. G. Das, T. Meena and P. Ghorai, *J. Org. Chem.*, 2017, **82**, 3411-3424.
19. J. Wang, T. Wang, H. Du, N. Chen, J. Xu and Z. Yang, *J. Org. Chem.*, 2023, **88**, 12572-12584.
20. N. Y. More and M. Jeganmohan, *Chem. Commun.*, 2017, **53**, 9616-9619.
21. Q. X. Guo, Z. J. Wu, Z. B. Luo, Q. Z. Liu, J. L. Ye, S. W. Luo and L. Z. Gong, *J. Am. Chem. Soc.*, 2007, **129**, 13927-13938.
22. E. Gaster, Y. Vainer, A. Regev, S. Narute, K. Sudheendran, A. Werbeloff, H. Shalit and D. Pappo, *Angew. Chem., Int. Ed.*, 2015, **54**, 4198-4202.
23. N. Lv, M. Xie, W. Gu, H. Ruan, S. Qiu, C. Zhou and Z. Cui, *Org. Lett.*, 2013, **15**, 2382-2385.
24. S. Narute, R. Parnes, F. D. Toste and D. Pappo, *J. Am. Chem. Soc.*, 2016, **138**, 16553-16560.
